# Supplementary material
Source: PubMed Central journal article supplement (PMC6035374)
Supplement: mmc3.pdf [file mmc3.pdf]

# Estimating SNP-Based Heritability and Genetic Correlation in Case-Control Studies Directly and with Summary Statistics

Omer Weissbrod,<sup>1,2,4,\*</sup> Jonathan Flint,<sup>3</sup> and Saharon Rosset<sup>1,\*</sup>

Methods that estimate SNP-based heritability and genetic correlations from genome-wide association studies have proven to be powerful tools for investigating the genetic architecture of common diseases and exposing unexpected relationships between disorders. Many relevant studies employ a case-control design, yet most methods are primarily geared toward analyzing quantitative traits. Here we investigate the validity of three common methods for estimating SNP-based heritability and genetic correlation between diseases. We find that the phenotype-correlation-genotype-correlation (PCGC) approach is the only method that can estimate both quantities accurately in the presence of important non-genetic risk factors, such as age and sex. We extend PCGC to work with arbitrary genetic architectures and with summary statistics that take the case-control sampling into account, and we demonstrate that our new method, PCGC-s, accurately estimates both SNP-based heritability and genetic correlations and can be applied to large datasets without requiring individual-level genotypic or phenotypic information. Finally, we use PCGC-s to estimate the genetic correlation between schizophrenia and bipolar disorder and demonstrate that previous estimates are biased, partially due to incorrect handling of sex as a strong risk factor.

## Introduction

Much of the theory underlying methods for estimating two key measures of disease genetic architecture, SNP-based heritability and genetic correlation, was designed for cohort studies of quantitative phenotypes. Consequently, when applied to studies of categorical traits, these methods may contain unacknowledged biases that may affect estimation accuracy.

The problem of accurately estimating SNP-based heritability and genetic correlation is usually translated into questions about variance and covariance components in properly defined mathematical models. A commonly held misconception states that variance components can be accurately calculated in case-control studies by virtue of applying a correction factor to results derived under a quantitative trait framework.<sup>1–4</sup> However, this is not true when risk factors (including risk variants) exert a strong influence on disease risk. In this paper we examine the validity of approaches for estimating heritability, genetic covariance, and correlation (covariance standardized to a  $[-1, 1]$  scale) in case-control studies of disease.

Broadly speaking, there are three common approaches for carrying out these tasks. The first is based on restricted maximum likelihood estimation (REML) in the linear mixed model (LMM)<sup>5</sup> framework and is implemented in some widely used tools.<sup>6–8</sup> This approach has been extensively applied to heritability estimation<sup>1,5,7</sup> and to genetic correlation estimation.<sup>7,9–11</sup>

The second approach is based on regression of phenotype correlations on genotype correlations and relies on

less restrictive assumptions than the LMM approach. This approach was originally designed for quantitative phenotypes, in which case it is known as Haseman-Elston (HE) regression.<sup>12,13</sup> It has recently been adapted for case-control studies, in which case it is called PCGC.<sup>14,15</sup> A common misconception states that PCGC is the same as HE regression (up to a scaling factor), but this equivalence holds only in the absence of covariates.<sup>14</sup> Rather than being an extension of HE regression, PCGC was carefully derived from first principles to apply to all relevant situations in case-control studies. In this paper we extend PCGC to also estimate genetic correlation and to accommodate arbitrary genetic architectures.

The third approach is the family of linkage disequilibrium score regression (LDSC) methods, which estimate heritability and genetic correlation while accounting for LD,<sup>2,16</sup> and have recently been applied to numerous large-scale studies.<sup>17–33</sup> LDSC is attractive because it requires only publicly available summary statistics from genetic studies, thereby avoiding privacy and logistical concerns.<sup>34</sup> Other summary-statistics-based methods have also been proposed recently but we focus on LDSC, as alternative methods cannot be applied in the presence of LD<sup>3</sup> or are not directly designed for categorical phenotypes.<sup>4,35,36</sup>

Here we examine all three approaches under a common set of assumptions that is shared by all of them. We demonstrate that even when these assumptions hold, LDSC and REML yield biased estimates in the presence of covariates representing major risk factors such as sex and age, due to incorrect modeling of case-control

<sup>1</sup>Statistics Department, Tel Aviv University, Ramat Aviv 6997801, Israel; <sup>2</sup>Computer Science Department, Technion - Israel Institute of Technology, Haifa 3200003, Israel; <sup>3</sup>Semel Institute for Neuroscience and Human Behavior, University of California Los Angeles, Los Angeles, CA 90405, USA

<sup>4</sup>Present address: Department of Epidemiology, Harvard T.H. Chan School of Public Health, Boston, MA 02115, USA

\*Correspondence: [oweissbrod@hsph.harvard.edu](mailto:oweissbrod@hsph.harvard.edu) (O.W.), [saharon@post.tau.ac.il](mailto:saharon@post.tau.ac.il) (S.R.)

<https://doi.org/10.1016/j.ajhg.2018.06.002>

© 2018 American Society of Human Genetics.

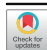

ascertainment. In contrast, PCGC remains unbiased under all settings. We further develop a new version of PCGC, called PCGC-s, that can work with summary statistics that explicitly take the case-control sampling into account.

We demonstrate the value of PCGC-s by investigating the genetic correlation between schizophrenia and bipolar disorder and between type 1 diabetes and coronary artery disease. We demonstrate that the estimates of both quantities are severely biased under alternative methods, partially due to incorrect handling of sex—an important risk factor. Finally, we provide best practice recommendations depending on the available data and the trait characteristics.

## Material and Methods

### Underlying Mixed Effects Model

We adopt the theoretical framework of the liability threshold model,<sup>37,38</sup> which is the same model assumed by REML<sup>1</sup> and LDSC<sup>2</sup> for analysis of case-control studies. This model assumes that every individual  $i$  has a latent normally distributed liability value for trait  $t$ ,  $a_t^i$ , such that case subjects of trait  $t$  are individuals whose liability exceeds a given cutoff.

We additionally assume that the liability of trait  $t$  can be decomposed into three terms corresponding to a covariates effect  $q_t^i$ , a genetic effect  $g_t^i$ , and an environmental effect  $e_t^i$ ,  $a_t^i = q_t^i + g_t^i + e_t^i$ , such that the vectors of covariate effects  $\mathbf{q}_t = [q_t^1, \dots, q_t^m]^T$ , of genetic effects  $\mathbf{g}_t = [g_t^1, \dots, g_t^m]^T$ , and of environmental effects  $\mathbf{e}_t = [e_t^1, \dots, e_t^m]^T$  are given by:

$$\mathbf{q}_t = \mathbf{C}_t \boldsymbol{\beta}_t$$

$$\mathbf{g}_t \sim \mathcal{N}\left(0; \sigma_{gt}^2 \mathbf{G}_t\right)$$

$$\mathbf{e}_t \sim \mathcal{N}\left(0; \left(1 - \sigma_{gt}^2\right) \mathbf{I}\right).$$

Here,  $\mathbf{C}_t$  is a design matrix of covariates,  $\boldsymbol{\beta}_t$  is a column vector of fixed effects,  $\mathbf{G}_t$  is a matrix of genetic similarity coefficients (defined below),  $\sigma_{gt}^2$  is a genetic variance parameter, and  $\mathbf{I}$  is the identity matrix. The matrix  $\mathbf{G}_t$  is typically given by  $\mathbf{G}_t = \mathbf{X}_t \mathbf{W} \mathbf{X}_t^T$ , where  $\mathbf{X}_t$  is an  $n \times m$  matrix of  $m$  standardized single-nucleotide polymorphisms (SNPs), and  $\mathbf{W}$  is an  $m \times m$  diagonal weighting matrix, which assigns different weights to different SNPs. This definition can accommodate any linear genetic architecture; it includes the standard model used by common REML software packages<sup>6,7</sup> and by LDSC<sup>2,16</sup> under the special case  $\mathbf{W} = (1/m) \mathbf{I}$ . However, it can also accommodate minor allele frequency (MAF)-dependent and LD-dependent architectures,<sup>8,39</sup> which correspond to a suitable choice of  $\mathbf{W}$  (Supplemental Methods).

Under these assumptions, every individual  $i$  has an observed affection status indicator for trait  $t$ ,  $y_t^i$ , such that  $y_t^i = 1$  if and only if  $a_t^i > \tau_t$ , where  $\tau_t = \Phi^{-1}(1 - K_t) + E[\mathbf{C}_t]^T \boldsymbol{\beta}_t$  is the affection cutoff for trait  $t$  with prevalence  $K_t$ , and where  $\Phi^{-1}(\cdot)$  is the inverse cumulative standard normal density.

For a pair of traits  $t_1, t_2$ , the concatenated liabilities vector follows a multivariate normal distribution,

$$\begin{bmatrix} \mathbf{a}_{t_1} \\ \mathbf{a}_{t_2} \end{bmatrix} \sim \mathcal{N} \left( \begin{bmatrix} \mathbf{C}_{t_1} \boldsymbol{\beta}_{t_1} \\ \mathbf{C}_{t_2} \boldsymbol{\beta}_{t_2} \end{bmatrix}, \begin{bmatrix} \sigma_{gt_1}^2 \mathbf{G}_{t_1} + (1 - \sigma_{gt_1}^2) \mathbf{I}_{t_1} & \rho_{t_1, t_2} \mathbf{G}_{t_1, t_2} \\ \rho_{t_1, t_2} (\mathbf{G}_{t_1, t_2})^T & \sigma_{gt_2}^2 \mathbf{G}_{t_2} + (1 - \sigma_{gt_2}^2) \mathbf{I}_{t_2} \end{bmatrix} \right),$$

where  $\mathbf{G}_{t_1, t_2} = \mathbf{X}_{t_1} \mathbf{W} \mathbf{X}_{t_2}^T$  is the matrix of between-study genetic similarity coefficients (i.e., the genetic similarity coefficients between each individual in study 1 and each individual in study 2),  $\rho_{t_1, t_2}$  is the genetic covariance, and  $\mathbf{I}_{t_1}, \mathbf{I}_{t_2}$  are identity matrices of suitable dimensions.

The quantities we investigate in this paper are defined as follows:

- The SNP-based heritability of trait  $t$ , defined as  $h_t^2 \triangleq \text{var}(g_t^i) / \text{var}(a_t^i)$ .
- The SNP-based genetic covariance of two traits  $t_1, t_2$ , defined as  $\rho_{t_1, t_2} \triangleq \text{cov}(g_{t_1}^i, g_{t_2}^i)$ .
- The SNP-based genetic correlation of two traits  $t_1, t_2$ , defined as  $r_g \triangleq \rho_{t_1, t_2} / \sqrt{\text{var}(g_{t_1}^i) \text{var}(g_{t_2}^i)}$ .

In the remainder of this article we use the shortened terms “heritability,” “genetic covariance,” and “genetic correlation” for brevity.

### The Effect of Ignoring Covariates

The main contribution of PCGC-s over LDSC is its ability to account for covariates. Although it is rarely possible to measure all covariates affecting the trait of interest, covariates with a strong effect (such as the effect of sex on coronary artery disease) are often measured. This raises the question of whether omission of such important covariates affects heritability and genetic correlation estimates. We prove in the Supplemental Methods that if a method can provide unbiased estimates in settings with no covariates, it can also provide unbiased estimates in settings with covariates by simply ignoring these covariates, assuming that the covariate effects are (1) normally distributed and (2) uncorrelated with the genetic effect. The main idea behind the derivation is that the environmental effect represents the aggregated effect of unmeasured covariates and can thus absorb the effect of omitted covariates when these assumptions hold.

The assumption of normality approximately holds if a trait is influenced by a large number of covariates with small effects, owing to the central limit theorem. However, many traits are strongly influenced by a small number of non-normally distributed covariates, such as sex. Heritability estimates with omitted covariates can become inaccurate in the presence of such strong covariates. In contrast, genetic correlation is accurately estimated in the simulations even in the presence of strong non-normal covariates, suggesting that the errors in the estimation of genetic covariance and genetic variance approximately cancel out when dividing one by the other. However, this observation is currently unsupported by statistical theory.

The assumption that covariates are uncorrelated with the genetic effect is often violated when using heritable covariates, such as genetic principal components. This problem can be circumvented by regressing the omitted covariates out of the

genotypes and correcting the individual-level affection cutoffs prior to parameter estimation or to computing summary statistics (Supplemental Methods). We caution that regression of covariates out of binary phenotypes as suggested in Bulik-Sullivan<sup>40</sup> can yield incorrect estimates in case-control studies, even for genetic correlation (as verified in the Results).

### Marginal and Conditional Heritability

An important point often overlooked in heritability estimation is that covariates such as sex and age also contribute to the liability variance. Since the liability is non-identifiable, it is typically assumed to have a unit variance when conditioning on measured covariates. The liability is defined as  $a_t^i = g_t^i + e_t^i + (\mathbf{C}_t^i)^T \boldsymbol{\beta}_t$ , and thus its marginal variance is given by  $\text{var}[g_t^i + e_t^i] + \text{var}[(\mathbf{C}_t^i)^T \boldsymbol{\beta}_t] = 1 + \text{var}[(\mathbf{C}_t^i)^T \boldsymbol{\beta}_t]$  (assuming that covariates are uncorrelated with the genetic effects). Consequently, heritability is given by  $\sigma_{gt}^2 / (1 + \text{var}[(\mathbf{C}_t^i)^T \boldsymbol{\beta}_t])$  (Supplemental Methods). Alternatively, one could assume that the marginal variance is 1, in which case the conditional variance is smaller than 1.

In practice, many studies define the genetic variance  $\sigma_{gt}^2$  as the heritability, even in the presence of covariates. We therefore denote the former definition as marginal heritability and the latter definition as conditional heritability, because the latter definition uses the variance of the liability conditional on measured covariates.

In this paper we consider marginal heritability for two reasons: (1) this definition is arguably more natural, as different studies using different covariates are ultimately interested in estimating the same quantity; and (2) LDSC tends to severely underestimate the conditional heritability (as compared to less severe overestimation of marginal heritability). Therefore, we do not consider estimation of conditional heritability further in this paper.

### PCGC-s with No Covariates

PCGC with no covariates estimates  $\rho_{t_1, t_2}$  by regressing standardized phenotypic correlations  $\tilde{y}_{t_1}^i \tilde{y}_{t_2}^j$  on genetic similarity coefficients  $G_{t_1, t_2}^{ij}$  and then dividing the resulting estimator by a constant  $f(t_1, t_2)$  (Supplemental Methods). This estimation encapsulates both genetic covariance and heritability, which for a trait  $t$  with no covariates is given by  $\rho_{t,t}$ .

The PCGC estimator can be computed without individual-level data by using the following two summary statistics:

$$z_t^k \triangleq \frac{1}{\sqrt{n_t}} \sum_{i=1}^{n_t} \tilde{y}_t^i X_t^{k,i}$$

$$\hat{r}_t^{k,h} \triangleq \frac{1}{n_t} \sum_{i=1}^{n_t} X_t^{k,i} X_t^{h,i}$$

where  $n_t$  is the sample size of study  $t$  and  $X_t^{k,i}$  is the value of the  $k$ th variant of individual  $i$  in study  $t$ , after standardization. It is also possible to use logistic regression-based or other types of summary statistics, but this constitutes an approximation (Supplemental Methods).

Using these quantities and denoting  $S_{t_1, t_2}$  as the set of all pairs of indices  $i, j$  that refer to the same individual shared between the two studies, the PCGC estimator can be written as:

$$\hat{\rho}_{t_1, t_2}^{\text{pcgc-s}} \triangleq \frac{1}{f(t_1, t_2)} \frac{\frac{\sqrt{n_{t_1} n_{t_2}} \sum_{k=1}^m z_{t_1}^k z_{t_2}^k - \sum_{(i,j) \in S_{t_1, t_2}} G_{t_1, t_2}^{ij} (\tilde{y}_{t_1}^i \tilde{y}_{t_2}^j)}{m}}{\frac{n_{t_1} n_{t_2} \sum_{k,h=1}^m \hat{r}_{t_1}^{k,h} \hat{r}_{t_2}^{k,h} - \sum_{(i,j) \in S_{t_1, t_2}} (G_{t_1, t_2}^{ij})^2}}{m^2}}$$

where  $m$  is the number of variants and  $f(t_1, t_2)$  is given by:

$$f(t_1, t_2) = \frac{\sqrt{P_{t_1}(1-P_{t_1})P_{t_2}(1-P_{t_2})}\phi(\tau_{t_1})\phi(\tau_{t_2})}{K_{t_1}(1-K_{t_1})K_{t_2}(1-K_{t_2})}$$

Here,  $K_t$  and  $P_t$  are the prevalence of trait  $t$  and the case-control proportion of study  $t$ , respectively,  $\tau_t = \Phi^{-1}(1-K_t)$  is the liability cutoff, and  $\phi(\cdot)$ ,  $\Phi(\cdot)$  are the density and cumulative distribution of the standard normal distribution, respectively.

The resulting estimator approximately coincides with the LDSC estimator if there are no overlapping individuals (i.e., individuals that are included in both studies) and the in-sample LD estimates in both studies are the same as in the reference population used by LDSC.<sup>40</sup> The extension to estimating multiple variance components or for using MAF and LD-dependent genetic architectures is straightforward (Supplemental Methods).

The second term of the numerator and of the denominator can be computed by research groups with access to the genotypes and phenotypes of overlapping individuals, which often consist of control cohorts, or can be approximated via the approximation  $G_{t_1, t_2}^{ij} \approx 1.0$  for overlapping individuals, as done implicitly in LDSC.<sup>2</sup> However, we caution that even minor deviations (which can occur for example by regressing principal components out of genotypes) can affect the approximation (Supplemental Methods).

A particularly convenient property of  $\hat{\rho}_{t_1, t_2}^{\text{pcgc-s}}$  in the absence of covariates is that when estimating the genetic correlation, all terms dependent on the trait prevalence vanish. This is convenient because the true trait prevalence is often not known with certainty.

### PCGC-s with Covariates

In the presence of covariates, PCGC estimates  $\rho_{t_1, t_2}$  by regressing  $\tilde{y}_{t_1}^i \tilde{y}_{t_2}^j$  on  $G_{t_1, t_2}^{ij} Q_{t_1, t_2}^{ij}$ , where  $Q_{t_1, t_2}^{ij}$  is a quantity that depends on the covariates of individuals  $i$  and  $j$ , and so the regression constant is different for every pair of individuals.<sup>14</sup> The corresponding PCGC-s estimator is given by:

$$\hat{\rho}_{t_1, t_2}^{\text{pcgc-covar-s}} \triangleq \frac{\frac{1}{m} \sum_{k=1}^m z_{t_1}^{k, \text{covar}} z_{t_2}^{k, \text{covar}} - \sum_{(i,j) \in S_{t_1, t_2}} \tilde{y}_{t_1}^i \tilde{y}_{t_2}^j G_{t_1, t_2}^{ij} Q_{t_1, t_2}^{ij}}{\frac{1}{m^2} \sum_{k,h=1}^m \hat{r}_{t_1}^{k,h, \text{covar}} \hat{r}_{t_2}^{k,h, \text{covar}} - \sum_{(i,j) \in S_{t_1, t_2}} (G_{t_1, t_2}^{ij} Q_{t_1, t_2}^{ij})^2}}$$

The above quantities are defined as follows:

$$z_t^{k, \text{covar}} \triangleq \sum_{i=1}^{n_t} \tilde{y}_t^i X_t^{k,i} \sum_{a=0}^1 u_{t,a}^i$$

$$\hat{r}_t^{k,h, \text{covar}} \triangleq \sum_{i=1}^{n_t} X_t^{k,i} X_t^{h,i} \sum_{a,b=0}^1 u_{t,a}^i u_{t,b}^i$$

$$Q_{t_1, t_2}^{ij} \triangleq \sum_{a,b=0}^1 u_{t_1,a}^i u_{t_2,b}^j, \text{ where } u_{t,0}^i, u_{t,1}^i \text{ are given by:}$$

$$u_{t,0}^i \triangleq \frac{\phi(\tau_t^i)}{\sqrt{P_t(1-P_t)} \left( K_t^i + (1-K_t) \frac{K_t(1-P_t)}{P_t(1-K_t)} \right)} \frac{K_t(1-P_t) P_t^i}{P_t(1-K_t)}$$

$$u_{i,1}^i \triangleq \frac{\phi(\tau_t^i)}{\sqrt{P_t^i(1-P_t^i) \left( K_t^i + (1-K_t^i) \frac{K_t(1-P_t)}{P_t(1-K_t)} \right)}} (1-P_t^i).$$

Here,  $K_t^i$  is the probability of individual  $i$  being a case conditional on her covariates,  $P_t^i$  is the probability of individual  $i$  being a case conditional on her covariates and on being ascertained into the study, and  $\tau_t^i = \Phi^{-1}(1 - K_t^i)$  is the liability cutoff of individual  $i$  conditional on her covariates.

The full derivation, extensions for multiple variance components and for MAF and LD-dependent architectures, and an approximation that requires a single summary statistic instead of using  $\hat{r}_t^{k,h,covar}$  (which requires a number of statistics equal to the number of pairs of variants) are provided in the [Supplemental Methods](#).

As in the case of no covariates, the second term of the numerator and denominator can be computed by research groups with access to overlapping individuals, which often consist of control cohorts. Third parties with no access to overlapping individuals can approximate the terms on the right-hand sides of the numerator and the denominator given appropriate summary statistics ([Supplemental Methods](#)).

## Results

We are interested in estimating the following quantities (see [Material and Methods](#) for exact definitions): (a) heritability, the fraction of liability variance explained by genetics; (b) genetic covariance, the covariance between the genetic components of two traits on the liability scale; and (c) genetic correlation, the genetic covariance standardized to a  $[-1,1]$  scale.

We are concerned with the three following questions:

1. Can quantities (a)–(c) be estimated reliably given genotypic and phenotypic data?
2. Can quantities (a)–(c) be estimated reliably given summary statistics via LDSC?
3. Can quantities (a)–(c) be estimated reliably given summary statistics via an alternative method?

The answers to questions 1 and 2 are summarized in [Table S1](#). Briefly, PCGC is the only method that can estimate all quantities of interest under all investigated settings. REML provides inconsistent estimates of quantities (a) and (b) and empirically provides consistent estimates of quantity (c). LDSC can provide consistent estimates of quantities (a) and (b) in the absence of covariates and provides consistent estimates of quantity (c) when no covariates are included in the analysis. To answer question 3, we present a reformulation of PCGC called PCGC-s that can estimate quantities (a)–(c) reliably using only summary statistics, both with and without covariates ([Supplemental Methods](#)).

## Simulation Studies

We conducted simulation studies to investigate the behavior of the evaluated methods in case-control studies;

such simulations require first obtaining a very large pool with hundreds of thousands of individuals, and then sampling a small fraction of case subjects according to the trait prevalence.<sup>1,14,16,41</sup>

Our simulations were based on the liability threshold model. Briefly, for every non-genetic covariate  $k$  we sampled two independent effect for two different traits ( $t_1$  and  $t_2$ ), denoted as  $\beta_{t_1}^k, \beta_{t_2}^k$ , from a normal distribution. In addition, for every SNP  $j$  we sampled two correlated effect sizes,  $b_{t_1}^j, b_{t_2}^j$ . A subset of these effects were equal to zero (determined according to the desired trait polygenicity). Every other pair of effects was sampled independently from a bivariate normal distribution, whose covariance matrix was determined according to the desired heritabilities and genetic correlation of the two traits. In most simulations the variance of all pairs of effects was the same, though we also evaluated MAF and LD-dependent architectures, as described below.

For every individual  $i$ , we generated a vector of uniformly spaced SNPs whose LD decays exponentially with distance, denoted as  $\mathbf{x}^i$ , and a vector of independent covariates denoted as  $\mathbf{c}^i$ . Finally, for every individual  $i$  and for every trait  $t \in \{t_1, t_2\}$ , we generated (1) a normally distributed environmental effect  $e_t^i$ ; (2) a liability given by  $a_t^i = (\mathbf{x}^i)^T \boldsymbol{\beta}_t + (\mathbf{c}^i)^T \boldsymbol{\beta}_t + e_t^i$ ; and (3) a case/control label, where case subjects are individuals with  $a_t^i > \tau_t$ , with  $\tau_t$  being the empirical  $1 - K_t$  percentile of the liabilities in the population, and  $K_t$  is the prevalence of trait  $t$ . We kept on sampling individuals until obtaining the desired number of case and control subjects. The full simulation details are provided in the [Supplemental Methods](#).

Our simulations span a wide range of scenarios, with various levels of prevalence, heritability, genetic correlation, sample sizes, number of SNPs, number of covariates, LD patterns, fraction of shared controls, and trait polygenicity. In each experiment we varied one or more of the above parameters while keeping the others fixed. The default simulation parameters used 1% prevalence, 50% heritability, and 50% genetic correlation, with each study having 2,000 case subjects, 1,000 unique and 1,000 overlapping control subjects, and 10,000 SNPs whose LD decays exponentially with distance, and with a correlation of between 25% and 90% between consecutive SNPs (consequently, the correlation between every pair of SNPs separated by at least 25 SNPs is  $<0.001$  in all settings). In most simulations all SNPs influenced the phenotype, though we verified that relaxing this assumption does not affect the results (see details below). 100 simulations were conducted for each unique combination of settings.

The examined methods included (1) PCGC-s; (2) PCGC-s-LD, which is an approximate version of PCGC-s that uses external LD estimates (but uses data about overlapping individuals; [Supplemental Methods](#)); (3) LDSC with omitted covariates (LDSC-omit); and (4) REML, using the implementation in GCTA<sup>6</sup> (exact execution details are provided in the [Supplemental Methods](#)). Note that PCGC-s is exactly equivalent to PCGC when all required summary

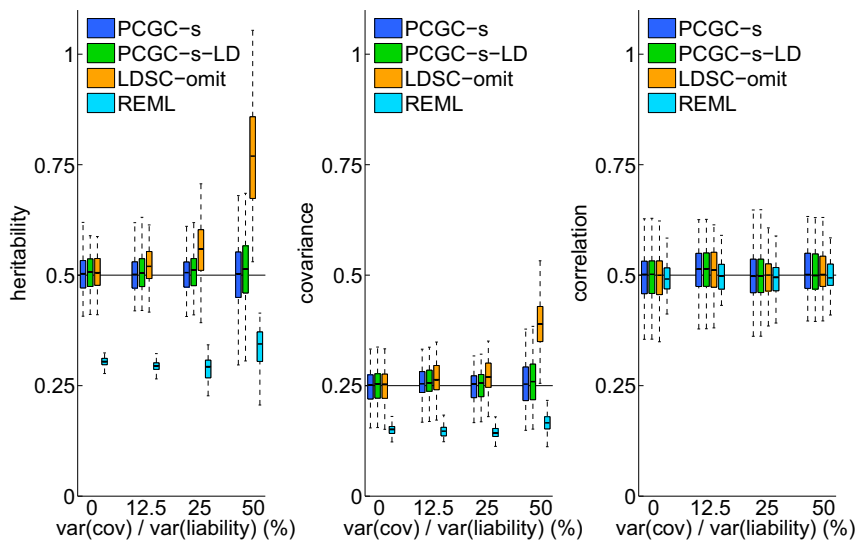

**Figure 1. The Effect of Covariate Strength** PCGC-s and PCGC-s-LD estimate all parameters accurately under all settings; LDSC-omit estimates of heritability and genetic covariance become increasingly inaccurate as the covariates strength increases; REML misestimates heritability and genetic covariance under all settings. All methods estimate genetic correlation accurately. The black horizontal lines indicate the true parameter values. 100 experiments were performed for each unique combination of settings, and each study included 2,000 case subjects and 2,000 control subjects.

statistics are provided. LDSC-omit refers to LDSC that does not include any covariates in the analysis and was used because explicit inclusion of covariates can lead to highly biased estimates, as demonstrated below. In most simulations LDSC-omit was based on our own implementation, to avoid confounding the analysis by implementation details. Specifically, our implementation of LDSC-omit used a predetermined intercept and did not weight summary statistics by their posterior variance, similarly to PCGC-s-LD (see [Discussion](#) for elaboration on these issues). In additional simulations described below, we demonstrated that when using the `ldsc` software instead of our own implementation, LDSC-omit became less accurate.

Our first experiment examined the impact of covariate effect magnitude on the estimation of heritability, genetic covariance, and genetic correlation. We simulated datasets with five binary covariates that explained various fractions of the liability variance, where the first covariate accounted for 95% of the aggregated covariates effect. All methods estimated correlation well, but PCGC-s and PCGC-s-LD were the only methods that estimated the two other quantities accurately ([Figure 1](#)). Both PCGC-s and PCGC-s-LD estimated heritability significantly more accurately than LDSC-omit ( $p < 2.1 \times 10^{-2}$ ,  $p < 1.7 \times 10^{-6}$ ,  $p < 6.5 \times 10^{-24}$  for covariates explaining 12.5%, 25%, and 50% of the liability variance, respectively; binomial test for PCGC-s-LD; PCGC-s results were effectively the same). The accuracy of LDSC-omit improved as effect sizes became smaller; LDSC-omit and PCGC give very similar estimates in the absence of covariates, as expected from theory ([Supplemental Methods](#)). REML consistently underestimated heritability despite using the correction for case-control ascertainment implemented in GCTA.<sup>1</sup> We note that the extent of under-estimation by REML is not fixed with a known ratio but depends on various unknown parameters.<sup>14</sup> We also obtained similar results when ignoring the contribution of covariates to the liability variance ([Material and Methods](#), [Figure S1](#)).

The next experiment examined the implications of having normal versus non-normal covariate effects, by considering three settings: (1) a single binary covariate, (2) a single normally distributed covariate, and (3) 20 equally strong binary covariates. In all settings the covariates jointly explained 40% of the liability variance. Setting 1 encodes a non-normal aggregated effect, whereas settings 2 and 3 encode a normal and an approximately normal effect (owing to the central limit theorem), respectively. In setting 1, LDSC-omit was substantially less accurate than PCGC-s ( $p < 3.21 \times 10^{-19}$ ; binomial test) and PCGC-s-LD ( $p < 2.73 \times 10^{-20}$ ; binomial test), because its underlying model is violated in the presence of strong non-normally distributed covariates ([Figure 2](#), [Material and Methods](#)). The bias of LDSC-omit decreased when decreasing the magnitude of the covariate effects, similarly to the results shown in [Figure 1](#).

In additional experiments, we simulated data with one strong and four weak binary covariates as in the first experiment, where the covariates jointly explained 25% of the liability variance, and verified that the results remained similar under various levels of heritability ([Figure S2](#)), genetic correlation ([Figure S3](#)), prevalence ([Figure S4](#)), LD ([Figure S5](#)), fraction of shared controls ([Figure S6](#)), numbers of covariates ([Figure S7](#)), sample sizes ([Figure S8](#)), numbers of simulated causal SNPs ([Figure S9](#)), and trait polygenicity ([Figure S10](#)). We also explored running LDSC-omit using the `ldsc` software ([Figure S11](#)) and using logistic regression-based summary statistics ([Figures S12](#) and [S13](#)).

We also examined the effect of using LDSC without omitting covariates, by regressing measured covariates out of the phenotypes and genotypes prior to computing summary statistics, as previously recommended.<sup>16,40</sup> Our results demonstrate that LDSC estimates are severely down-biased in this setting, with an average bias of more than 10% in heritability and covariance estimation, and of more than 5% in correlation estimation, under realistic settings ([Figures S14](#) and [S15](#)).

Next, we performed a set of experiments with a MAF and LD-dependent genetic architectures. Specifically, we simulated phenotypes according to the LDK model,<sup>8</sup> which

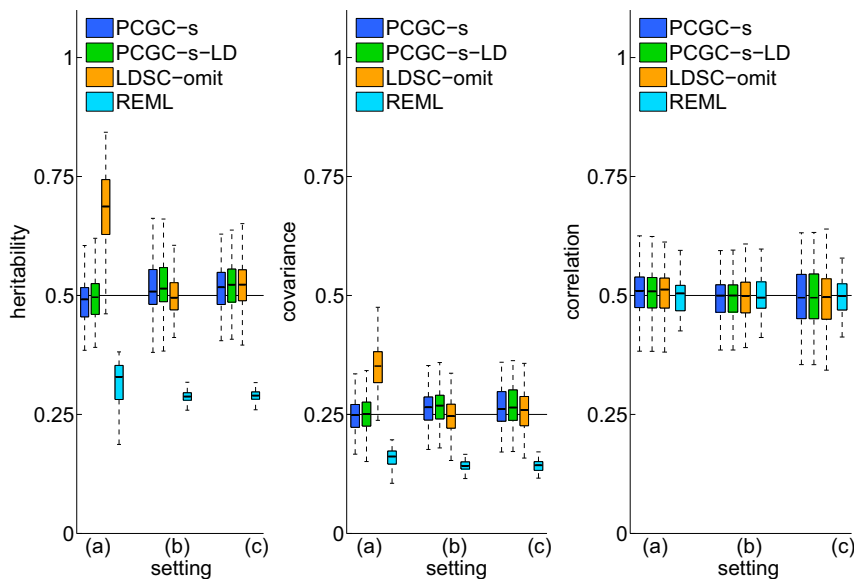

**Figure 2. The Effect of the Covariate Effects Distribution**

Setting (a) includes a single binary covariate; setting (b) includes a single normally distributed covariate; setting (c) includes 20 binary variables with equal strength, yielding an approximately normal aggregated effect owing to the central limit theorem. PCGC-s and PCGC-s-LD are the only methods that accurately estimate heritability and genetic covariance in setting (a), where the covariates effects distribution is far from normal. 100 experiments were performed for each unique combination of settings, and each study included 2,000 case subjects and 2,000 control subjects.

The PCGC-s heritability estimates for SCZ and BP were 39.2% and 41.7%, respectively. The estimated genetic correlation was 42.4%, which is substantially

lower than previous estimates of 68% using REML<sup>10</sup> and 79% using LDSC.<sup>2</sup> We further verified that when omitting covariates, the PCGC-s estimates increased to 60%, suggesting that incorrect treatment of non-genetic risk factors can lead to inflated estimates. When invoking LDSC on the same data using the *ldsc* software, the estimated correlation could not be computed when omitting covariates due to negative estimated heritabilities and was 15.8% when regressing the covariates out of the phenotypes (Table 1). We also estimated the heritabilities and genetic correlation under the LDK model<sup>8</sup> and obtained very similar estimates (Table S3). Namely, the heritability estimates for SCZ and BP were 40.0% and 46.1%, respectively, and the estimated genetic correlation was 43.8%. Overall, we conclude that improper handling of covariates and of sample overlap in case-control studies can lead to substantially biased estimates and to incorrect conclusions regarding the genetic architecture of genetic diseases.

replaces the standard genetic similarity matrix  $\mathbf{G}_t = \mathbf{X}_t \mathbf{X}_t^T / m$  with the matrix  $\mathbf{G}_t = \mathbf{X}_t \mathbf{W} \mathbf{X}_t^T / M$ , where  $\mathbf{W} = \text{diag}[(p^j(1-p^j))^{0.75} w^j]$ ,  $p^j$  is the MAF of SNP  $j$ ,  $w^j$  minimizes the  $L_2$  norm of  $(1 - \sum_{k=1}^m (r^{k,j})^2 w^k)$ , and  $M = \sum_k W_{kk}$ . All methods yielded biased estimates of heritability and genetic covariance when using the incorrect genetic similarity matrix  $\mathbf{G}_t = \mathbf{X}_t \mathbf{X}_t^T / m$  (Figure S16). However, PCGC-s and PCGC-s-LD became unbiased when using the correct genetic similarity matrix, whereas the other methods remained biased even when using the correct genetic similarity matrix (Figure S17). Interestingly, all methods yielded empirically unbiased estimates of genetic correlation even when using an incorrect model, suggesting that the approximation errors cancel themselves out, similarly to the patterns observed when not correctly modeling case-control ascertainment. A numerical summary of all the results reported in this section is provided in Table S2.

Finally, we note that PCGC-s-LD is highly computationally efficient. Since PCGC-s-LD uses only summary statistics, it can perform estimation for data with millions of variants and hundreds of thousands of individuals in less than 1 hr (results not shown).

### Estimating the Genetic Architecture of Schizophrenia and Bipolar Disorder

To demonstrate the behavior of the methods on real data, we studied the heritability and genetic correlation of schizophrenia (SCZ)<sup>42</sup> and bipolar disorder (BP).<sup>43</sup> To prevent confounding due to population stratification,<sup>44</sup> we restricted the analysis to two highly concordant Swedish datasets consisting of 1,745 SCZ-affected case subjects, 1,268 BP-affected case subjects, and 6,293 control subjects, 2,566 of which are shared between the studies<sup>42,43</sup> (Supplemental Methods). The covariates included 10 principal components and sex, which is a major risk factor for both diseases.

### Estimating the Genetic Architecture of Type 1 Diabetes and Coronary Artery Disease

To further evaluate PCGC-s, we studied the correlation between type 1 diabetes (T1D) and coronary artery disease (CAD), using data from the Wellcome Trust Case Control Consortium 1 (WTCCC1).<sup>45</sup> It is known that T1D is associated with an increased risk for CAD,<sup>46</sup> but the role of genetics in this association is not clear. We chose to explore this example because of the expected impact of covariates on the result: T1D is very strongly affected by SNPs in the major histocompatibility complex (MHC) region, and sex is a major risk factor for CAD. We thus modeled the effects of these risk factors as fixed rather than random and investigated the implications of inclusion and exclusion of these covariates. The analysis details are provided in the Supplemental Methods.

The results demonstrated the existence of a positive genetic correlation between T1D and CAD and corroborated

**Table 1. Results of Real Data Analysis of Psychiatric Disorders**

| Covariates |                      | SCZ                |               | BP                 |               | Correlation   |
|------------|----------------------|--------------------|---------------|--------------------|---------------|---------------|
|            |                      | $\hat{\sigma}_g^2$ | $\hat{h}^2$   | $\hat{\sigma}_g^2$ | $\hat{h}^2$   |               |
| Omitted    | PCGC-s               | 0.127 (0.059)      | 0.127 (0.059) | 0.259 (0.044)      | 0.259 (0.044) | 0.561 (0.149) |
|            | PCGC-s-LD            | 0.139 (0.047)      | 0.139 (0.047) | 0.282 (0.057)      | 0.282 (0.057) | 0.602 (0.178) |
|            | LDSC-omit            | 0.467 (0.101)      | 0.467 (0.101) | 0.293 (0.109)      | 0.293 (0.109) | 0.451 (0.190) |
|            | LDSC-omit +intercept | 0.467 (0.101)      | 0.467 (0.101) | 0.293 (0.109)      | 0.293 (0.109) | –             |
| Included   | PCGC-s               | 0.399 (0.068)      | 0.392 (0.062) | 0.426 (0.051)      | 0.417 (0.045) | 0.437 (0.077) |
|            | PCGC-s-LD            | 0.438 (0.059)      | 0.430 (0.049) | 0.465 (0.059)      | 0.455 (0.058) | 0.424 (0.084) |
|            | LDSC                 | 0.412 (0.084)      | 0.405 (0.070) | 0.356 (0.105)      | 0.348 (0.103) | 0.527 (0.176) |
|            | LDSC+intercept       | 0.412 (0.084)      | 0.405 (0.077) | 0.356 (0.105)      | 0.349 (0.093) | 0.158 (0.112) |

Shown are the estimated values of the genetic variance  $\sigma_g^2$  (also termed the conditional heritability in this paper), the marginal heritability  $h^2$  (which is equal to  $\sigma_g^2$  when no covariates are present and smaller than  $\sigma_g^2$  in the presence of covariates) and the genetic correlation. Standard errors were computed via a block jackknife of 200 blocks of consecutive SNPs. LDSC+intercept is the LDSC estimator when fitting an intercept from the data.<sup>2</sup> LDSC-omit is different from PCGC-s-LD with omitted covariates because of differences in the predetermined intercept value due to normalization (Supplemental Methods). LDSC results were computed using the ldsc software. Values marked with “–” could not be computed because of negative or illegal parameter estimates.

the simulation studies (Table 2, Table S4). As expected, inclusion of covariates had a minor effect on PCGC-s estimates, decreasing the heritability estimate for T1D from 23.7% to 18.3% and for CAD from 40.5% to 39.9%, and slightly increasing the genetic correlation estimate from 18.1% to 19.2%. The LDSC heritability estimates for T1D and CAD when omitting covariates (35% and 58.8%, respectively) were greater than those of PCGC-s (consistent with our simulation results) and the correlation estimate was also greater (28.4%). LDSC heritability estimates were nonsensical (non-positive or greater than one) when including covariates or fitting an intercept rather than using a predetermined one. REML estimation of genetic correlation using gcta failed to converge.

We conclude that accounting for covariates can substantially affect heritability and genetic correlation estimates. However, we caution that the results are sensitive to preprocessing of the data (Tables S5–S7, Supplemental Methods; see Discussion). We also present genetic correlation estimates between all phenotypes included in the WTCCC1 study, confirming some well-known significant correlations, such as between hypertension and coronary artery disease; and others that have been tentatively suggested in the literature, such as between rheumatoid arthritis and coronary artery disease<sup>47,48</sup> (Table S8).

## Discussion

Our major conclusions regarding the existing approaches can be summarized as follows. (1) REML severely misestimates heritability and genetic covariance in case-control studies under all settings (as has been pointed out previously<sup>7,14,41</sup>). In settings without binary covariates, REML accurately estimates genetic correlation, but it can become slightly biased in the presence of such covariates. (2) LDSC estimates are accurate in the absence of covariates but can

become biased in the presence of binary covariates with strong effects. Importantly, regressing covariates out of phenotypes prior to running LDSC can lead to a very severe bias and should always be avoided. We further caution that the software implementation of LDSC can lead to different estimates than those of PCGC-s even in the absence of covariates due to different data preprocessing procedures, as discussed below. (3) PCGC accurately estimates all quantities of interest directly or with summary statistics. (4) Standard summary statistics cannot be used to estimate genetic correlation for traits with binary non-genetic risk factors; we propose here a novel formulation of privacy-preserving summary statistics which can be used for this task.

Another potentially problematic aspect of genetic correlation estimation is analysis of cohorts from ancestrally divergent populations. Our preliminary analysis demonstrated that analysis of such cohorts can lead to inflated and unstable genetic correlation estimates for all methods, even when using a large number of PCs as covariates (results not shown). We therefore opted to focus our analysis on two Swedish cohorts. Previous estimates of the genetic correlation between schizophrenia and bipolar disorder were based on cohorts from divergent European populations, which may be another reason for the large difference between our estimates and previous ones.<sup>2,10,44</sup>

When comparing different methods, it is important to distinguish between the underlying mathematics and the software implementation. Even though PCGC-s and LDSC are roughly equivalent in the absence of covariates, the software implementation of PCGC-s is careful to perform case-control-aware data preprocessing (e.g., avoiding in-sample SNP standardization, and avoid assuming that the diagonal of the genetic similarity matrix is exactly 1.0; Supplemental Methods). This can lead to major differences between the estimates of the software implementations in real data analysis. We therefore recommend that

**Table 2. Results of Real Data Analysis of T1D and CAD**

| Covariates |                      | T1D                |               | CAD                |               | Correlation   |
|------------|----------------------|--------------------|---------------|--------------------|---------------|---------------|
|            |                      | $\hat{\sigma}_g^2$ | $\hat{h}^2$   | $\hat{\sigma}_g^2$ | $\hat{h}^2$   |               |
| Omitted    | PCGC-s               | 0.237 (0.044)      | 0.237 (0.044) | 0.405 (0.063)      | 0.405 (0.063) | 0.181 (0.115) |
|            | PCGC-s-LD            | 0.245 (0.045)      | 0.245 (0.045) | 0.420 (0.065)      | 0.420 (0.065) | 0.181 (0.115) |
|            | LDSC-omit            | 0.350 (0.046)      | 0.350 (0.046) | 0.588 (0.066)      | 0.588 (0.066) | 0.284 (0.074) |
|            | LDSC-omit +intercept | 0.013 (0.105)      | 0.013 (0.105) | 0.020 (0.109)      | 0.020 (0.109) | –             |
| Included   | PCGC-s               | 0.241 (0.066)      | 0.183 (0.050) | 0.435 (0.070)      | 0.399 (0.062) | 0.192 (0.139) |
|            | PCGC-s-LD            | 0.250 (0.069)      | 0.190 (0.052) | 0.451 (0.065)      | 0.413 (0.060) | 0.191 (0.139) |
|            | LDSC                 | –1.75 (0.038)      | –             | –0.33 (0.058)      | –             | –             |
|            | LDSC+intercept       | –0.03 (0.046)      | –             | –0.07 (0.09)       | –             | –             |

The table fields are the same as in Table 1. LDSC results are based on our own implementation to provide a detailed comparison with PCGC-s that is not confounded by implementation details. Results using the ldsc software are provided in Table S4.

researchers use our software implementation of PCGC-s for analysis of case-control studies regardless of the presence of covariates, because PCGC-s is careful to preprocess case-control data correctly.

An important issue often raised in the context of heritability estimation regards the validity of the assumed model. One specific concern concerns the use of allele frequency and LD-dependent architectures.<sup>8,39,49,50</sup> While important, this concern is not directly related to our results, as PCGC-s can accommodate arbitrary linear genetic architectures (Supplemental Methods). Additional concerns include the difference between “SNP heritability” and “narrow sense heritability” which assumes that all causal SNPs are measured<sup>7,51</sup> and the potentially larger difference between narrow sense heritability and the true genetic heritability in the presence of non-additive effects.<sup>52</sup> These concerns are well founded and should certainly be addressed in practice. However, they are not directly related to our study, which focuses on the performance of different methods when the model assumed by these methods (liability threshold model and additivity) holds. We believe our conclusion, that commonly used methods can be biased under their own modeling assumptions, is of major interest even given the concerns about the validity of the assumptions themselves.

An important question that has been debated recently concerns the relationship between causal effect sizes and MAF and LD patterns.<sup>8,39,49</sup> PCGC-s can be readily modified to use any linear genetic architecture and can thus accommodate different genetic architectures. Several researchers recently advocated comparing between different models via the data likelihood,<sup>8</sup> but unfortunately exact likelihood estimation is infeasible in ascertained case-control studies. The determination of genetic architectures under case-control studies is therefore a potential line of future work.

Finally, the LDSC framework includes several techniques not considered in this work: estimation of the contribution of functional annotations to the liability variance,<sup>53</sup>

improved estimation by weighting of summary statistic,<sup>16</sup> and fitting an intercept from the data rather than using a predetermined one.<sup>16</sup> The first technique can be readily adapted into the PCGC-s framework (Supplemental Methods). We do not recommend using the other techniques in case-control studies, as the derivations underlying these techniques assume an additive phenotype with genotype-environment independence. Adapting these procedures into case-control studies under a formal theoretical framework remains a potential avenue for future work.

### Supplemental Data

Supplemental Data include 17 figures, 8 tables, and Supplemental Methods (mathematical derivations) and can be found with this article online at <https://doi.org/10.1016/j.ajhg.2018.06.002>.

### Acknowledgments

This study makes use of data generated by the Wellcome Trust Case Control Consortium. A full list of the investigators who contributed to the generation of the data is available from <https://www.wtccc.org.uk>. Funding for the project was provided by the Wellcome Trust under awards 076113, 085475, and 090355. We wish to thank the Swedish Bipolar Collection (SWEbic, PI Mikael Landén) for making data available. The authors thank Noah Zaitlen, Joel Mefford, and Na Cai for useful discussions.

This work was supported by the Israeli Science Foundation grant 1804/16. This collaboration started at the Computational Genomics Summer Institute funded by NIH grant GM112625. The funders had no role in study design, data collection and analysis, decision to publish, or preparation of the manuscript.

### Declaration of Interests

The authors declare no competing interests.

Received: February 2, 2018

Accepted: June 6, 2018

Published: July 5, 2018



## Web Resources

PCGC-s, <https://github.com/omerwe/PCGCs>

## References

1. Lee, S.H., Wray, N.R., Goddard, M.E., and Visscher, P.M. (2011). Estimating missing heritability for disease from genome-wide association studies. *Am. J. Hum. Genet.* *88*, 294–305.
2. Bulik-Sullivan, B., Finucane, H.K., Anttila, V., Gusev, A., Day, F.R., Loh, P.R., Duncan, L., Perry, J.R., Patterson, N., Robinson, E.B., et al.; ReproGen Consortium; Psychiatric Genomics Consortium; and Genetic Consortium for Anorexia Nervosa of the Wellcome Trust Case Control Consortium 3 (2015). An atlas of genetic correlations across human diseases and traits. *Nat. Genet.* *47*, 1236–1241.
3. Palla, L., and Dudbridge, F. (2015). A fast method that uses polygenic scores to estimate the variance explained by genome-wide marker panels and the proportion of variants affecting a trait. *Am. J. Hum. Genet.* *97*, 250–259.
4. Zhou, X. (2017). A unified framework for variance component estimation with summary statistics in genome-wide association studies. *Ann. Appl. Stat.* *11*, 2027–2051.
5. Yang, J., Benyamin, B., McEvoy, B.P., Gordon, S., Henders, A.K., Nyholt, D.R., Madden, P.A., Heath, A.C., Martin, N.G., Montgomery, G.W., et al. (2010). Common SNPs explain a large proportion of the heritability for human height. *Nat. Genet.* *42*, 565–569.
6. Yang, J., Lee, S.H., Goddard, M.E., and Visscher, P.M. (2011). GCTA: a tool for genome-wide complex trait analysis. *Am. J. Hum. Genet.* *88*, 76–82.
7. Loh, P.-R., Bhatia, G., Gusev, A., Finucane, H.K., Bulik-Sullivan, B.K., Pollack, S.J., de Candia, T.R., Lee, S.H., Wray, N.R., Kendler, K.S., et al.; Schizophrenia Working Group of Psychiatric Genomics Consortium (2015). Contrasting genetic architectures of schizophrenia and other complex diseases using fast variance-components analysis. *Nat. Genet.* *47*, 1385–1392.
8. Speed, D., Cai, N., Johnson, M.R., Nejentsev, S., Balding, D.J.; and UCLEB Consortium (2017). Reevaluation of SNP heritability in complex human traits. *Nat. Genet.* *49*, 986–992.
9. Lee, S.H., Yang, J., Goddard, M.E., Visscher, P.M., and Wray, N.R. (2012). Estimation of pleiotropy between complex diseases using single-nucleotide polymorphism-derived genomic relationships and restricted maximum likelihood. *Bioinformatics* *28*, 2540–2542.
10. Lee, S.H., Ripke, S., Neale, B.M., Faraone, S.V., Purcell, S.M., Perlis, R.H., Mowry, B.J., Thapar, A., Goddard, M.E., Witte, J.S., et al.; Cross-Disorder Group of the Psychiatric Genomics Consortium; and International Inflammatory Bowel Disease Genetics Consortium (IIBDGC) (2013). Genetic relationship between five psychiatric disorders estimated from genome-wide SNPs. *Nat. Genet.* *45*, 984–994.
11. Chen, G.B., Lee, S.H., Brion, M.J., Montgomery, G.W., Wray, N.R., Radford-Smith, G.L., Visscher, P.M.; and International IBD Genetics Consortium (2014). Estimation and partitioning of (co)heritability of inflammatory bowel disease from GWAS and immunochip data. *Hum. Mol. Genet.* *23*, 4710–4720.
12. Haseman, J.K., and Elston, R.C. (1972). The investigation of linkage between a quantitative trait and a marker locus. *Behav. Genet.* *2*, 3–19.
13. Chen, G.-B. (2014). Estimating heritability of complex traits from genome-wide association studies using IBS-based Haseman-Elston regression. *Front. Genet.* *5*, 107.
14. Golan, D., Lander, E.S., and Rosset, S. (2014). Measuring missing heritability: inferring the contribution of common variants. *Proc. Natl. Acad. Sci. USA* *111*, E5272–E5281.
15. Bonnet, A. (2018). Heritability estimation of diseases in case-control studies. *Electron. J. Stat.* *12*, 1662–1716.
16. Bulik-Sullivan, B.K., Loh, P.R., Finucane, H.K., Ripke, S., Yang, J., Patterson, N., Daly, M.J., Price, A.L., Neale, B.M.; and Schizophrenia Working Group of the Psychiatric Genomics Consortium (2015). LD Score regression distinguishes confounding from polygenicity in genome-wide association studies. *Nat. Genet.* *47*, 291–295.
17. Robinson, E.B., St Pourcain, B., Anttila, V., Kosmicki, J.A., Bulik-Sullivan, B., Grove, J., Maller, J., Samocha, K.E., Sanders, S.J., Ripke, S., et al.; iPSYCH-SSI-Broad Autism Group (2016). Genetic risk for autism spectrum disorders and neuropsychiatric variation in the general population. *Nat. Genet.* *48*, 552–555.
18. The Brainstorm Consortium, Anttila, V., Bulik-Sullivan, B., Finucane, H.K., Walters, R.K., Bras, J., Duncan, L., Escott-Price, V., Falcone, G.J., Gormley, P., et al. (2018). Analysis of shared heritability in common disorders of the brain. *Science* *360*, eaap8757.
19. Lo, M.-T., Hinds, D.A., Tung, J.Y., Franz, C., Fan, C.-C., Wang, Y., Smeland, O.B., Schork, A., Holland, D., Kauppi, K., et al. (2017). Genome-wide analyses for personality traits identify six genomic loci and show correlations with psychiatric disorders. *Nat. Genet.* *49*, 152–156.
20. Li, Z., Chen, J., Yu, H., He, L., Xu, Y., Zhang, D., Yi, Q., Li, C., Li, X., Shen, J., et al. (2017). Genome-wide association analysis identifies 30 new susceptibility loci for schizophrenia. *Nat. Genet.* *49*, 1576–1583.
21. Sniekers, S., Stringer, S., Watanabe, K., Jansen, P.R., Coleman, J.R.I., Krapohl, E., Taskesen, E., Hammerschlag, A.R., Okbay, A., Zabaneh, D., et al. (2017). Genome-wide association meta-analysis of 78,308 individuals identifies new loci and genes influencing human intelligence. *Nat. Genet.* *49*, 1107–1112.
22. Hobbs, B.D., de Jong, K., Lamontagne, M., Bossé, Y., Shrine, N., Artigas, M.S., Wain, L.V., Hall, I.P., Jackson, V.E., Wyss, A.B., et al.; COPDGen Investigators; ECLIPSE Investigators; LifeLines Investigators; SPIROMICS Research Group; International COPD Genetics Network Investigators; UK BiLEVE Investigators; and International COPD Genetics Consortium (2017). Genetic loci associated with chronic obstructive pulmonary disease overlap with loci for lung function and pulmonary fibrosis. *Nat. Genet.* *49*, 426–432.
23. Luciano, M., Hagenaars, S.P., Davies, G., Hill, W.D., Clarke, T.-K., Shiri, M., Harris, S.E., Marioni, R.E., Liewald, D.C., Fawns-Ritchie, C., et al. (2018). Association analysis in over 329,000 individuals identifies 116 independent variants influencing neuroticism. *Nat. Genet.* *50*, 6–11.
24. Lane, J.M., Liang, J., Vlasac, I., Anderson, S.G., Bechtold, D.A., Bowden, J., Emsley, R., Gill, S., Little, M.A., Luik, A.I., et al. (2017). Genome-wide association analyses of sleep disturbance traits identify new loci and highlight shared genetics

- with neuropsychiatric and metabolic traits. *Nat. Genet.* 49, 274–281.
25. Ji, S.-G., Juran, B.D., Mucha, S., Folseraas, T., Jostins, L., Melum, E., Kumasaka, N., Atkinson, E.J., Schlicht, E.M., Liu, J.Z., et al.; UK-PSC Consortium; International IBD Genetics Consortium; and International PSC Study Group (2017). Genome-wide association study of primary sclerosing cholangitis identifies new risk loci and quantifies the genetic relationship with inflammatory bowel disease. *Nat. Genet.* 49, 269–273.
  26. Day, F.R., Thompson, D.J., Helgason, H., Chasman, D.I., Finucane, H., Sulem, P., Ruth, K.S., Whalen, S., Sarkar, A.K., Albrecht, E., et al.; LifeLines Cohort Study; InterAct Consortium; kConFab/AOCS Investigators; Endometrial Cancer Association Consortium; Ovarian Cancer Association Consortium; and PRACTICAL consortium (2017). Genomic analyses identify hundreds of variants associated with age at menarche and support a role for puberty timing in cancer risk. *Nat. Genet.* 49, 834–841.
  27. Kanai, M., Akiyama, M., Takahashi, A., Matoba, N., Momozawa, Y., Ikeda, M., Iwata, N., Ikegawa, S., Hirata, M., Matsuda, K., et al. (2018). Genetic analysis of quantitative traits in the Japanese population links cell types to complex human diseases. *Nat. Genet.* 50, 390–400.
  28. McKay, J.D., Hung, R.J., Han, Y., Zong, X., Carreras-Torres, R., Christiani, D.C., Caporaso, N.E., Johansson, M., Xiao, X., Li, Y., et al.; SpiroMeta Consortium (2017). Large-scale association analysis identifies new lung cancer susceptibility loci and heterogeneity in genetic susceptibility across histological subtypes. *Nat. Genet.* 49, 1126–1132.
  29. Pardiñas, A.F., Holmans, P., Pocklington, A.J., Escott-Price, V., Ripke, S., Carrera, N., Legge, S.E., Bishop, S., Cameron, D., Hamshere, M.L., et al.; GERAD1 Consortium; CRESTAR Consortium; GERAD1 Consortium; CRESTAR Consortium; GERAD1 Consortium; and CRESTAR Consortium (2018). Common schizophrenia alleles are enriched in mutation-intolerant genes and in regions under strong background selection. *Nat. Genet.* 50, 381–389.
  30. Hammerslag, A.R., Stringer, S., de Leeuw, C.A., Snickers, S., Taskesen, E., Watanabe, K., Blanken, T.F., Dekker, K., Te Lindert, B.H.W., Wassing, R., et al. (2017). Genome-wide association analysis of insomnia complaints identifies risk genes and genetic overlap with psychiatric and metabolic traits. *Nat. Genet.* 49, 1584–1592.
  31. Ferreira, M.A., Vonk, J.M., Baurecht, H., Marenholz, I., Tian, C., Hoffman, J.D., Helmer, Q., Tillander, A., Ullemer, V., van Dongen, J., et al.; 23andMe Research Team; AAGC collaborators; BIOS consortium; and LifeLines Cohort Study (2017). Shared genetic origin of asthma, hay fever and eczema elucidates allergic disease biology. *Nat. Genet.* 49, 1752–1757.
  32. Kemp, J.P., Morris, J.A., Medina-Gomez, C., Forgetta, V., Warrington, N.M., Youten, S.E., Zheng, J., Gregson, C.L., Grundberg, E., Trajanoska, K., et al. (2017). Identification of 153 new loci associated with heel bone mineral density and functional involvement of GPC6 in osteoporosis. *Nat. Genet.* 49, 1468–1475.
  33. Sanchez-Roige, S., Fontanillas, P., Elson, S.L., Pandit, A., Schmidt, E.M., Foerster, J.R., Abecasis, G.R., Gray, J.C., de Wit, H., Davis, L.K., et al.; 23andMe Research Team (2018). Genome-wide association study of delay discounting in 23,217 adult research participants of European ancestry. *Nat. Neurosci.* 21, 16–18.
  34. Pasaniuc, B., and Price, A.L. (2017). Dissecting the genetics of complex traits using summary association statistics. *Nat. Rev. Genet.* 18, 117–127.
  35. Shi, H., Kichaev, G., and Pasaniuc, B. (2016). Contrasting the Genetic Architecture of 30 Complex Traits from Summary Association Data. *Am. J. Hum. Genet.* 99, 139–153.
  36. Zhu, X., and Stephens, M. (2017). Bayesian large-scale multiple regression with summary statistics from genome-wide association studies. *Ann. Appl. Stat.* 11, 1561–1592.
  37. Dempster, E.R., and Lerner, I.M. (1950). Heritability of Threshold Characters. *Genetics* 35, 212–236.
  38. Falconer, D.S. (1965). The inheritance of liability to certain diseases, estimated from the incidence among relatives. *Ann. Hum. Genet.* 29, 51–76.
  39. Gazal, S., Finucane, H.K., and Price, A.L. (2018). Reconciling S-LDSC and LDK functional enrichment estimates. *bioRxiv*. <https://www.biorxiv.org/content/early/2018/01/30/256412>.
  40. Bulik-Sullivan, B. (2015). Relationship between LD Score and Haseman-Elston Regression. *bioRxiv*, 018283. <https://www.biorxiv.org/content/early/2015/04/20/018283>.
  41. Hayeck, T.J., Zaitlen, N.A., Loh, P.R., Vilhjalmsón, B., Pollack, S., Gusev, A., Yang, J., Chen, G.B., Goddard, M.E., Visscher, P.M., et al. (2015). Mixed model with correction for case-control ascertainment increases association power. *Am. J. Hum. Genet.* 96, 720–730.
  42. Schizophrenia Working Group of the Psychiatric Genomics Consortium (2014). Biological insights from 108 schizophrenia-associated genetic loci. *Nature* 511, 421–427.
  43. Charney, A.W., Ruderfer, D.M., Stahl, E.A., Moran, J.L., Chamberlain, K., Belliveau, R.A., Forty, L., Gordon-Smith, K., Di Florio, A., Lee, P.H., et al. (2017). Evidence for genetic heterogeneity between clinical subtypes of bipolar disorder. *Transl. Psychiatry* 7, e993–e993.
  44. Bhatia, G., Gusev, A., Loh, P.-R., Finucane, H.K., Vilhjalmsón, B.J., Ripke, S., Purcell, S., Stahl, E., Daly, M., de Candia, T.R., et al. (2016). Subtle stratification confounds estimates of heritability from rare variants. *bioRxiv*, 048181. <https://www.biorxiv.org/content/early/2016/04/12/048181>.
  45. Wellcome Trust Case Control Consortium (2007). Genome-wide association study of 14,000 cases of seven common diseases and 3,000 shared controls. *Nature* 447, 661–678.
  46. Orchard, T.J., Costacou, T., Kretowski, A., and Nesto, R.W. (2006). Type 1 diabetes and coronary artery disease. *Diabetes Care* 29, 2528–2538.
  47. Goodson, N. (2002). Coronary artery disease and rheumatoid arthritis. *Curr. Opin. Rheumatol.* 14, 115–120.
  48. Maradit-Kremers, H., Nicola, P.J., Crowson, C.S., Ballman, K.V., and Gabriel, S.E. (2005). Cardiovascular death in rheumatoid arthritis: a population-based study. *Arthritis Rheum.* 52, 722–732.
  49. Yang, J., Zeng, J., Goddard, M.E., Wray, N.R., and Visscher, P.M. (2017). Concepts, estimation and interpretation of SNP-based heritability. *Nat. Genet.* 49, 1304–1310.
  50. Speed, D., and Balding, D. (2018). Better estimation of SNP heritability from summary statistics provides a new understanding of the genetic architecture of complex traits. *bioRxiv*. <https://www.biorxiv.org/content/early/2018/03/19/284976>.
  51. Yang, J., Bakshi, A., Zhu, Z., Hemani, G., Vinkhuyzen, A.A., Lee, S.H., Robinson, M.R., Perry, J.R., Nolte, I.M., van Vliet-Ostaptchouk, J.V., et al.; LifeLines Cohort Study (2015). Genetic

- variance estimation with imputed variants finds negligible missing heritability for human height and body mass index. *Nat. Genet.* *47*, 1114–1120.
52. Zuk, O., Hechter, E., Sunyaev, S.R., and Lander, E.S. (2012). The mystery of missing heritability: Genetic interactions create phantom heritability. *Proc. Natl. Acad. Sci. USA* *109*, 1193–1198.
53. Finucane, H.K., Bulik-Sullivan, B., Gusev, A., Trynka, G., Reshef, Y., Loh, P.R., Anttila, V., Xu, H., Zang, C., Farh, K., et al.; ReproGen Consortium; Schizophrenia Working Group of the Psychiatric Genomics Consortium; and RACI Consortium (2015). Partitioning heritability by functional annotation using genome-wide association summary statistics. *Nat. Genet.* *47*, 1228–1235.

**The American Journal of Human Genetics, Volume 103**

**Supplemental Data**

**Estimating SNP-Based Heritability  
and Genetic Correlation in Case-Control Studies  
Directly and with Summary Statistics**

**Omer Weissbrod, Jonathan Flint, and Saharon Rosset**

# Contents

|           |                                                                |           |
|-----------|----------------------------------------------------------------|-----------|
| <b>1</b>  | <b>Supplemental Tables</b>                                     | <b>2</b>  |
| <b>2</b>  | <b>Supplemental Figures</b>                                    | <b>6</b>  |
| <b>3</b>  | <b>PCGC without Covariates</b>                                 | <b>16</b> |
| <b>4</b>  | <b>PCGC with Covariates</b>                                    | <b>19</b> |
| <b>5</b>  | <b>Adapting PCGC to use Summary Statistics</b>                 | <b>21</b> |
| 5.1       | Approximate Summary Statistics without LD . . . . .            | 24        |
| 5.2       | Third Party Approximations . . . . .                           | 25        |
| <b>6</b>  | <b>Allele-frequency and LD Dependent Genetic Architectures</b> | <b>26</b> |
| <b>7</b>  | <b>Extension to Multiple Variance Components</b>               | <b>26</b> |
| <b>8</b>  | <b>Estimating the Liability Variance Due to Covariates</b>     | <b>27</b> |
| <b>9</b>  | <b>Logistic Regression based Summary Statistics</b>            | <b>28</b> |
| <b>10</b> | <b>Additional Summary Statistics</b>                           | <b>31</b> |
| <b>11</b> | <b>The Effect of Ignoring Covariates</b>                       | <b>34</b> |
| <b>12</b> | <b>Real Data Analysis</b>                                      | <b>34</b> |
| <b>13</b> | <b>The Effects of Preprocessing the Data</b>                   | <b>36</b> |
| <b>14</b> | <b>Simulations</b>                                             | <b>37</b> |
| <b>15</b> | <b>Use of Alternative Methods</b>                              | <b>39</b> |

# 1 Supplemental Tables

Table S1: **Estimation correctness of the investigated methods.** LDSC behaves differently depending on whether covariates are present. The entries marked with \* indicate that although the estimated quantity is empirically unbiased in simulations, it is given by the division of two biased estimates (the estimate in the second column divided by the product of the square roots of the estimates in the first column), suggesting that estimation errors cancel each other in the division. We are not currently aware of a theoretical justification for this behavior. The entry marked with \*\* is only empirically correct as long as covariates are excluded from the analysis.

|                 |      | heritability | genetic covariance | genetic correlation |
|-----------------|------|--------------|--------------------|---------------------|
| no covariates   | PCGC | ✓            | ✓                  | ✓                   |
|                 | LDSC | ✓            | ✓                  | ✓                   |
|                 | REML | ✗            | ✗                  | ✓*                  |
| with covariates | PCGC | ✓            | ✓                  | ✓                   |
|                 | LDSC | ✗            | ✗                  | ✓**                 |
|                 | REML | ✗            | ✗                  | ✓*                  |

Table S2: Please see Supplemental Excel file

Table S3: **Results of real data analysis of schizophrenia (SCZ) and bipolar disorder (BIP), when using the LDAK model assumptions [6] instead of the standard assumptions used in the results reported in the main text.**

| Covariates |           | SCZ                |                  | BIP                |                  | Correlation      |
|------------|-----------|--------------------|------------------|--------------------|------------------|------------------|
|            |           | $\hat{\sigma}_g^2$ | $\hat{h}^2$      | $\hat{\sigma}_g^2$ | $\hat{h}^2$      |                  |
| Omitted    | PCGC-s    | 0.048<br>(0.051)   | 0.048<br>(0.051) | 0.254<br>(0.056)   | 0.254<br>(0.056) | 0.850<br>(0.439) |
|            | PCGC-s-LD | 0.052<br>(0.059)   | 0.052<br>(0.059) | 0.288<br>(0.064)   | 0.288<br>(0.064) | 0.862<br>(0.488) |
| Included   | PCGC-s    | 0.407<br>(0.054)   | 0.400<br>(0.055) | 0.471<br>(0.057)   | 0.461<br>(0.059) | 0.438<br>(0.080) |
|            | PCGC-s-LD | 0.410<br>(0.060)   | 0.403<br>(0.062) | 0.486<br>(0.063)   | 0.476<br>(0.066) | 0.442<br>(0.086) |

Table S4: **Results of real data analysis of type 1 diabetes (T1D) and coronary artery disease (CAD), using the ldsc software**<sup>1</sup>. Shown are the estimated genetic variance  $\sigma_g^2$  and the genetic correlation, as obtained from the ldsc software. Marginal heritability estimates are not reported because they are not estimated in the ldsc software. Values marked with "-" could not be computed because of negative or illegal parameter estimates.

| Covariates |                     | T1D                | CAD                |               |
|------------|---------------------|--------------------|--------------------|---------------|
|            |                     | $\hat{\sigma}_g^2$ | $\hat{\sigma}_g^2$ | Correlation   |
| Omitted    | LDSC-omit           | 0.385 (0.049)      | 0.644 (0.069)      | 0.298 (0.069) |
|            | LDSC-omit+intercept | 0.055 (0.066)      | 0.102 (0.102)      | -1.07 (1.90)  |
| Included   | LDSC                | -1.80 (0.040)      | -0.338 (0.060)     | -             |
|            | LDSC+intercept      | -0.016 (0.037)     | 0.037 (0.090)      | -             |

Table S5: **Results of real data analysis, using in-sample SNP normalization.** The table is similar to Table 2 in the main text, but both studies estimated the minor allele frequencies based on the (shared) controls rather than using HapMap 3 estimates.

| Covariates |                       | T1D                |                  | CAD                |                  |                  |
|------------|-----------------------|--------------------|------------------|--------------------|------------------|------------------|
|            |                       | $\hat{\sigma}_g^2$ | $\hat{h}^2$      | $\hat{\sigma}_g^2$ | $\hat{h}^2$      | Correlation      |
| Omitted    | PCGC-s                | 0.295<br>(0.051)   | 0.295<br>(0.051) | 0.469<br>(0.064)   | 0.469<br>(0.064) | 0.231<br>(0.090) |
|            | PCGC-s-LD             | 0.291<br>(0.050)   | 0.291<br>(0.050) | 0.465<br>(0.064)   | 0.465<br>(0.064) | 0.231<br>(0.090) |
|            | LDSC-omit             | 0.284<br>(0.050)   | 0.284<br>(0.050) | 0.451<br>(0.064)   | 0.451<br>(0.064) | 0.215<br>(0.094) |
|            | LDSC-omit + intercept | 0.505<br>(0.552)   | 0.505<br>(0.552) | 0.014<br>(0.131)   | 0.014<br>(0.131) | -<br>-           |
| Included   | PCGC-s                | 0.277<br>(0.069)   | 0.210<br>(0.052) | 0.498<br>(0.072)   | 0.457<br>(0.066) | 0.239<br>(0.119) |
|            | PCGC-s-LD             | 0.274<br>(0.068)   | 0.208<br>(0.052) | 0.493<br>(0.064)   | 0.452<br>(0.059) | 0.239<br>(0.119) |
|            | LDSC                  | -1.80<br>(0.042)   | -<br>-           | -0.45<br>(0.057)   | -<br>-           | -<br>-           |
|            | LDSC + intercept      | 0.040<br>(0.080)   | 0.030<br>(0.060) | -0.065<br>(0.099)  | -<br>-           | -<br>-           |

<sup>1</sup><https://github.com/bulik/ldsc>

Table S6: **Results of real data analysis when regressing the top 10 principal components out of the genotypes and possibly using them as additional covariates.**

| Covariates |                       | T1D                |                   | CAD                |                   | Correlation      |
|------------|-----------------------|--------------------|-------------------|--------------------|-------------------|------------------|
|            |                       | $\hat{\sigma}_g^2$ | $\hat{h}^2$       | $\hat{\sigma}_g^2$ | $\hat{h}^2$       |                  |
| Omitted    | PCGC-s                | 0.219<br>(0.043)   | 0.219<br>(0.043)  | 0.406<br>(0.063)   | 0.406<br>(0.063)  | 0.200<br>(0.117) |
|            | PCGC-s-LD             | 0.226<br>(0.044)   | 0.226<br>(0.044)  | 0.419<br>(0.065)   | 0.419<br>(0.065)  | 0.198<br>(0.116) |
|            | LDSC-omit             | 0.301<br>(0.045)   | 0.301<br>(0.045)  | 0.538<br>(0.066)   | 0.538<br>(0.066)  | 0.241<br>(0.085) |
|            | LDSC-omit + intercept | -0.016<br>(0.097)  | -0.016<br>(0.097) | -0.057<br>(0.112)  | -0.057<br>(0.112) | -<br>-           |
| Included   | PCGC-s                | 0.258<br>(0.066)   | 0.196<br>(0.050)  | 0.471<br>(0.069)   | 0.432<br>(0.063)  | 0.287<br>(0.123) |
|            | PCGC-s-LD             | 0.266<br>(0.068)   | 0.202<br>(0.052)  | 0.487<br>(0.065)   | 0.446<br>(0.060)  | 0.284<br>(0.122) |
|            | LDSC                  | -1.78<br>(0.039)   | -<br>-            | -0.36<br>(0.057)   | -<br>-            | -<br>-           |
|            | LDSC + intercept      | -0.060<br>(0.044)  | -<br>-            | -0.11<br>(0.096)   | -<br>-            | -<br>-           |

Table S7: **Results of real data analysis when using in-sample SNP normalization and regressing the top 10 principal components out of the genotypes.** The table is similar to Supplemental Table 6, but both studies estimated the minor allele frequencies based on the (shared) controls rather than using HapMap 3 estimates.

| Covariates |                       | T1D                |                  | CAD                |                  | Correlation      |
|------------|-----------------------|--------------------|------------------|--------------------|------------------|------------------|
|            |                       | $\hat{\sigma}_g^2$ | $\hat{h}^2$      | $\hat{\sigma}_g^2$ | $\hat{h}^2$      |                  |
| Omitted    | PCGC-s                | 0.237<br>(0.045)   | 0.237<br>(0.045) | 0.456<br>(0.064)   | 0.456<br>(0.064) | 0.210<br>(0.103) |
|            | PCGC-s-LD             | 0.232<br>(0.044)   | 0.232<br>(0.044) | 0.447<br>(0.063)   | 0.447<br>(0.063) | 0.207<br>(0.102) |
|            | LDSC-omit             | 0.195<br>(0.045)   | 0.195<br>(0.045) | 0.383<br>(0.064)   | 0.383<br>(0.064) | 0.091<br>(0.135) |
|            | LDSC-omit + intercept | -0.081<br>(0.080)  | -<br>-           | -0.096<br>(0.129)  | -<br>-           | -<br>-           |
| Included   | PCGC-s                | 0.278<br>(0.068)   | 0.211<br>(0.052) | 0.534<br>(0.072)   | 0.489<br>(0.066) | 0.306<br>(0.110) |
|            | PCGC-s-LD             | 0.273<br>(0.066)   | 0.207<br>(0.050) | 0.524<br>(0.065)   | 0.479<br>(0.059) | 0.303<br>(0.108) |
|            | LDSC                  | -1.84<br>(0.041)   | -<br>-           | -0.50<br>(0.056)   | -<br>-           | -<br>-           |
|            | LDSC + intercept      | -0.065<br>(0.046)  | -<br>-           | -0.14<br>(0.106)   | -<br>-           | -<br>-           |



Table S8: **PCGC-s genetic correlation estimates between WTCCC1 phenotypes.** The traits and their assumed prevalences (following [1]) are Crohn’s disease (CD, 0.1%), type 1 diabetes (T1D; 0.5%), bipolar disorder (BD, 0.5%), rheumatoid arthritis (RA; 0.75%), type 2 diabetes (T2D; 3%), coronary artery disease (CAD; 3.5%) and hypertension (HT; 5%). All analyses included sex as a covariate. T1D and RA analyses additionally excluded the MHC region from the analysis and used MHC SNPs as covariates (Supplemental Note).

|     | CD               | T1D               | BD                | RA                | T2D               | CAD              | HT               |
|-----|------------------|-------------------|-------------------|-------------------|-------------------|------------------|------------------|
| CD  |                  | 0.067<br>(0.128)  | 0.217<br>(0.077)  | 0.047<br>(0.104)  | 0.155<br>(0.098)  | 0.114<br>(0.097) | 0.259<br>(0.087) |
| T1D | 0.067<br>(0.128) |                   | 0.090<br>(0.128)  | 0.387<br>(0.137)  | -0.054<br>(0.161) | 0.192<br>(0.139) | 0.089<br>(0.155) |
| BD  | 0.217<br>(0.077) | 0.090<br>(0.128)  |                   | -0.012<br>(0.117) | -0.145<br>(0.116) | 0.011<br>(0.103) | 0.136<br>(0.100) |
| RA  | 0.047<br>(0.104) | 0.387<br>(0.137)  | -0.012<br>(0.117) |                   | 0.228<br>(0.121)  | 0.314<br>(0.105) | 0.226<br>(0.124) |
| T2D | 0.155<br>(0.098) | -0.054<br>(0.161) | -0.145<br>(0.116) | 0.228<br>(0.121)  |                   | 0.343<br>(0.097) | 0.371<br>(0.092) |
| CAD | 0.114<br>(0.097) | 0.192<br>(0.139)  | 0.011<br>(0.103)  | 0.314<br>(0.105)  | 0.343<br>(0.097)  |                  | 0.280<br>(0.096) |
| HT  | 0.259<br>(0.087) | 0.089<br>(0.155)  | 0.136<br>(0.100)  | 0.226<br>(0.124)  | 0.371<br>(0.092)  | 0.280<br>(0.096) |                  |

## 2 Supplemental Figures

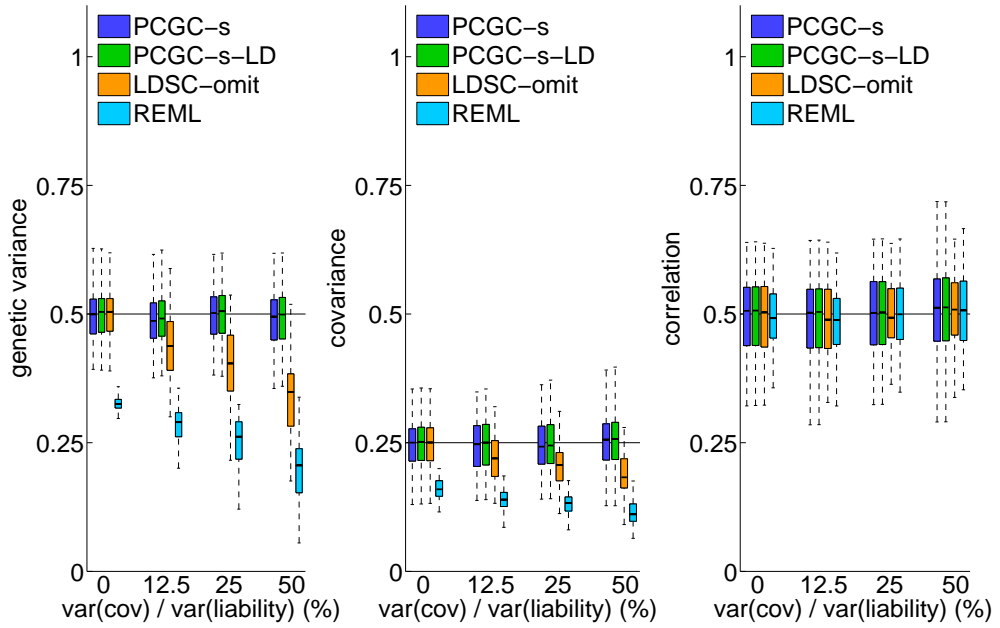

Figure S1: The performance of the evaluated methods when measuring the genetic variance  $\sigma_g^{2t}$  (also called the conditional heritability in the main text) instead of the marginal heritability  $h^{2t} = \frac{\sigma_g^{2t}}{1 + \text{var}(C_i^t \beta)}$  (see Methods in main text for further clarification regarding these terms).

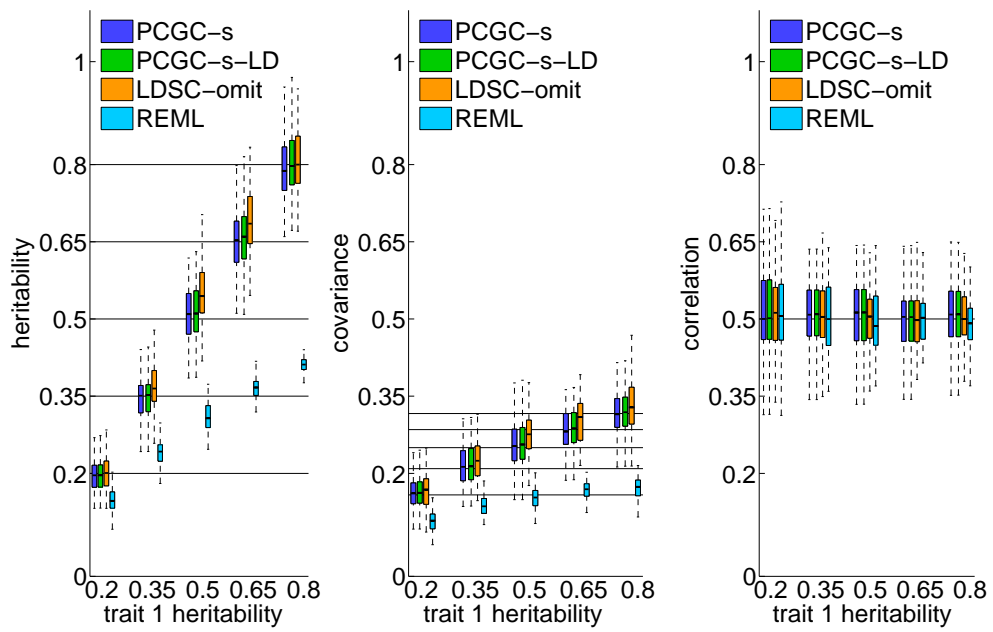

Figure S2: The performance of the evaluated methods under different heritability levels for trait 1. The black horizontal lines indicate the true parameter values. The genetic covariance values were set to obtain a genetic correlation of 50%.

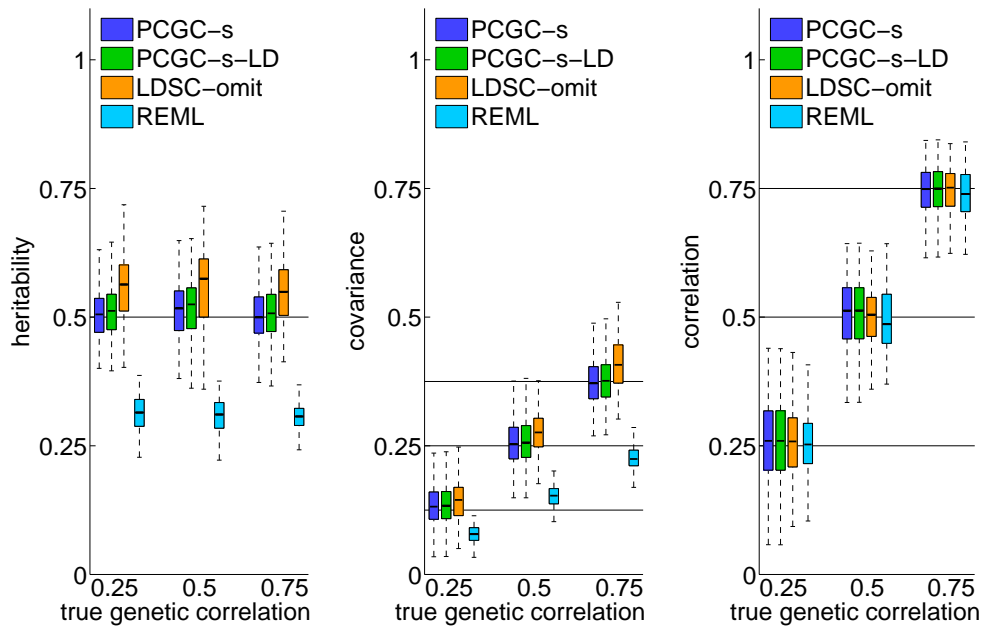

Figure S3: The performance of the evaluated methods under different genetic correlation levels. The black horizontal lines indicate the true parameter values.

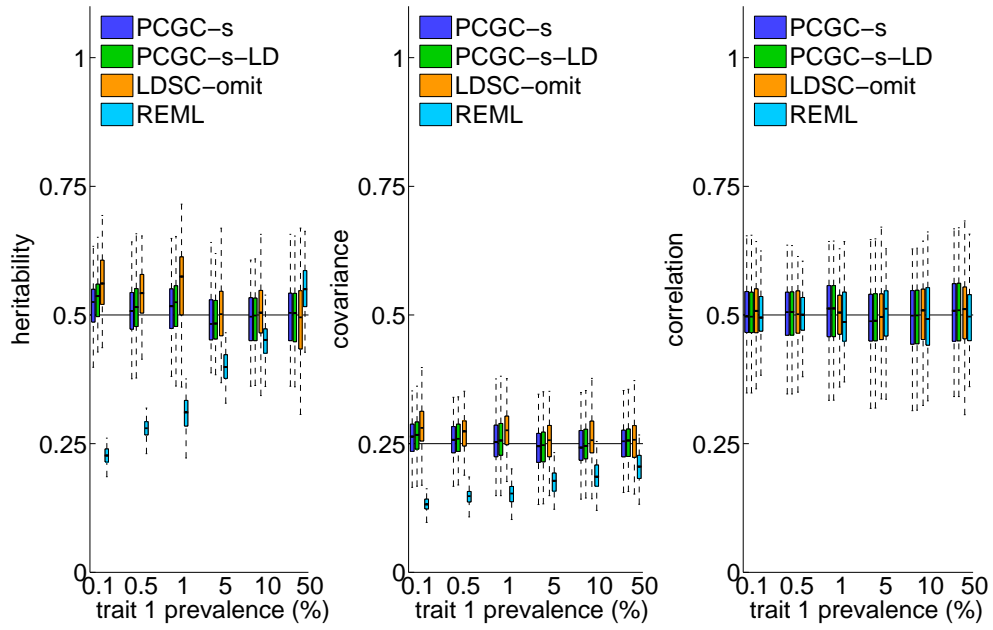

Figure S4: The performance of the evaluated methods under different prevalence levels. The in-sample case control ratio was 50% in all experiments.

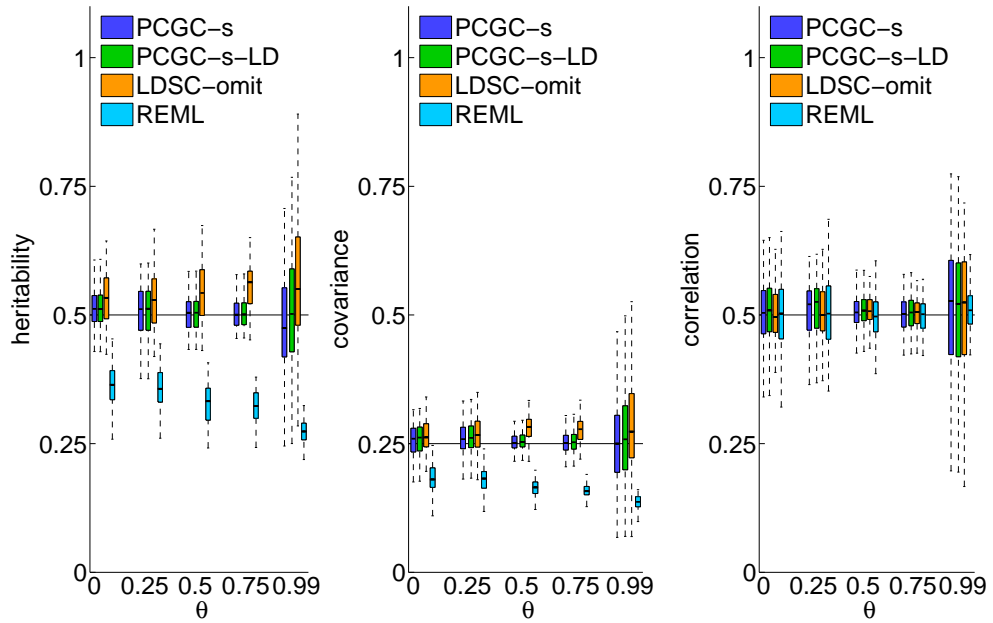

Figure S5: The effect of the LD parameter  $\theta$ . Larger values of  $\theta$  lead to a stronger correlation between adjacent SNPs. The standard error of all methods increases with the degree of LD.

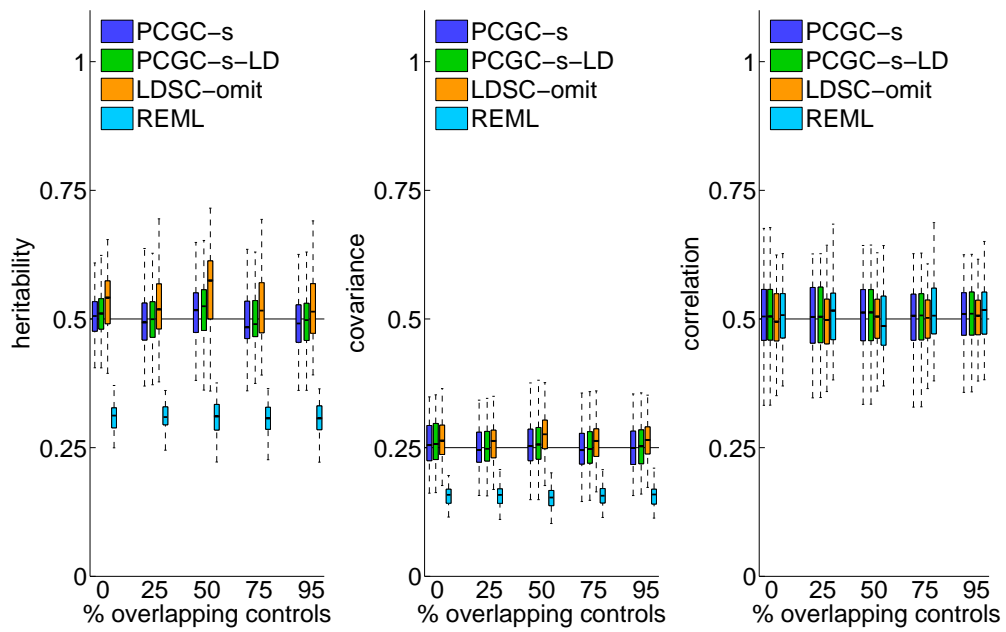

Figure S6: The performance of the evaluated methods under different levels of overlap between the control groups of the two studies.

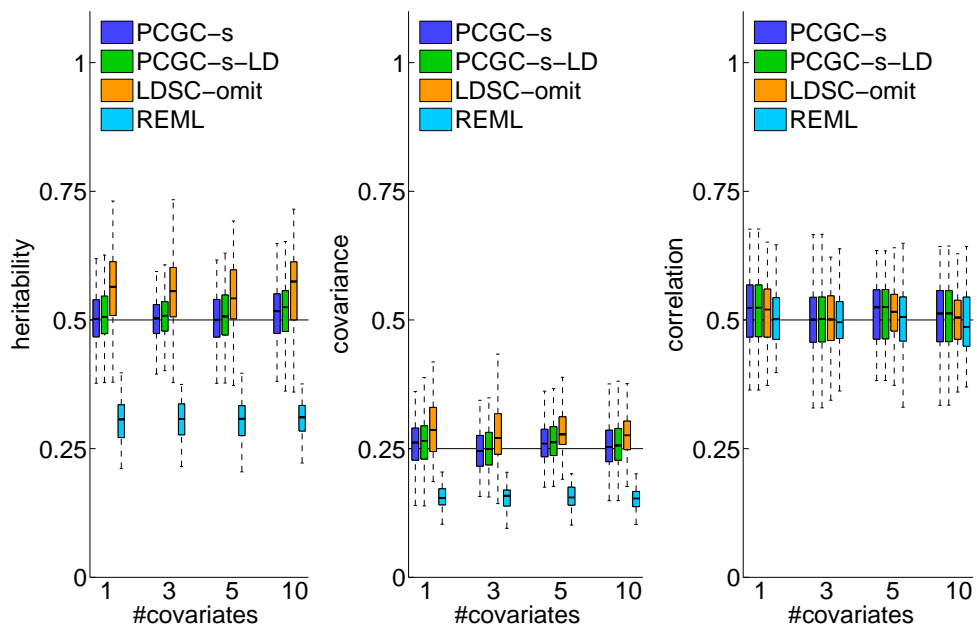

Figure S7: The performance of the evaluated methods under different numbers of measured covariates.

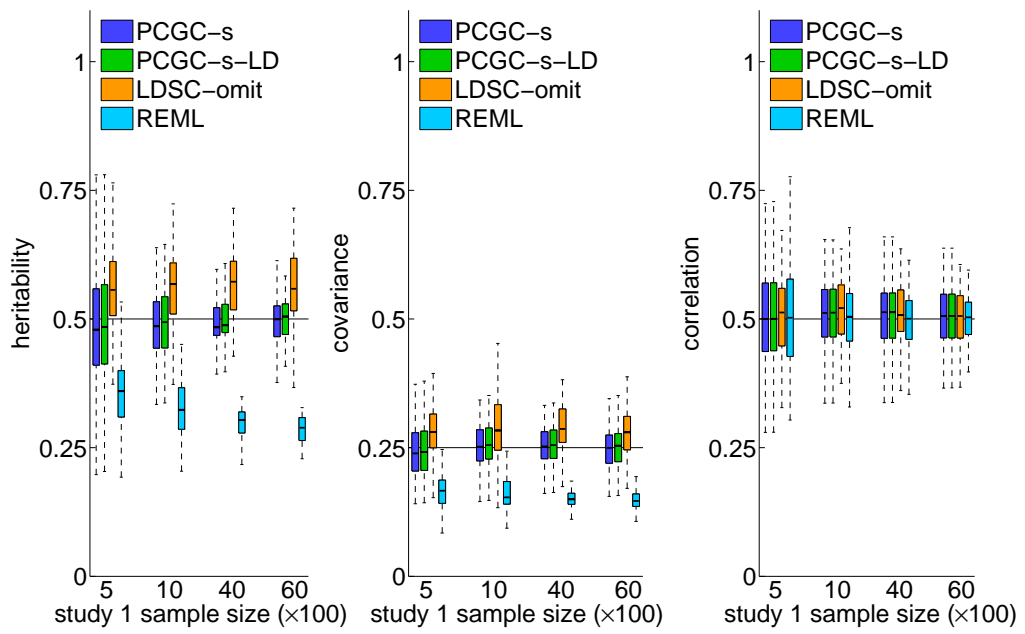

Figure S8: The performance of the evaluated methods under different sample sizes for study 1. PCGC and PCGC-s become increasingly more accurate as sample sizes increase.

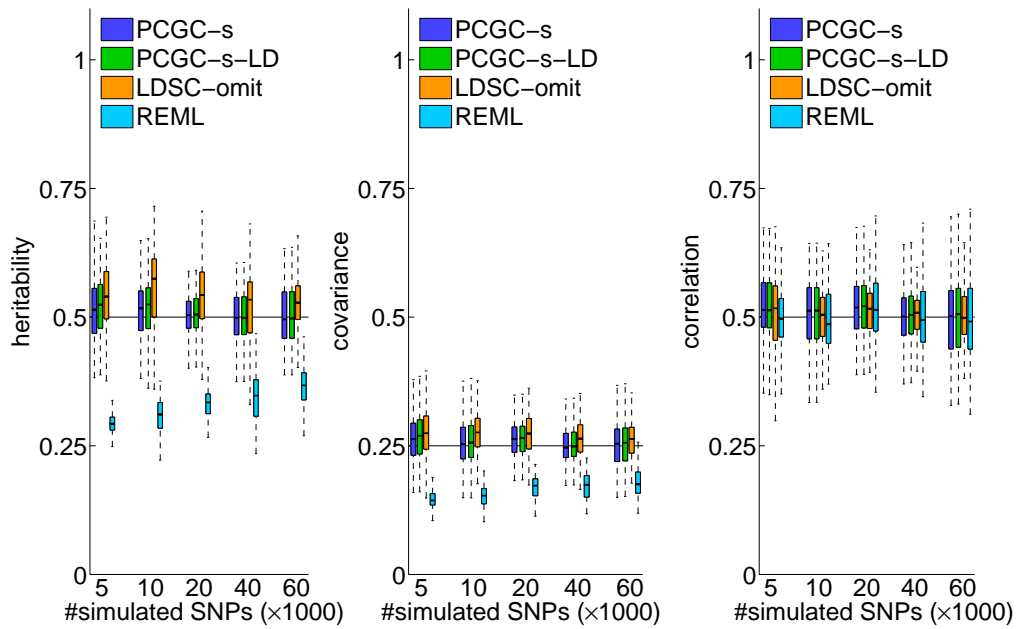

Figure S9: The performance of the evaluated methods under different numbers of simulated SNPs.

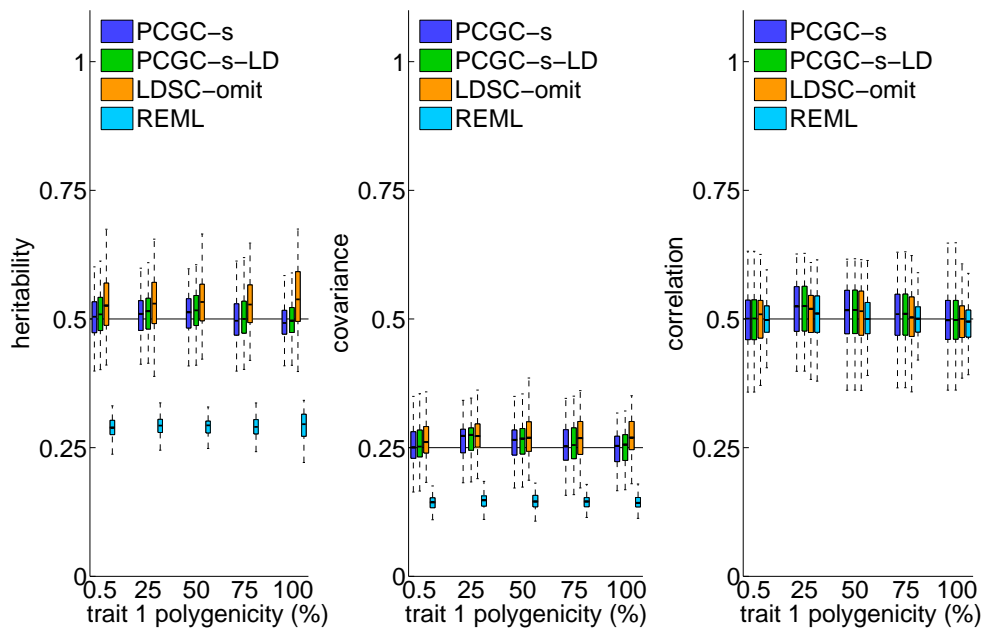

Figure S10: The performance of the evaluated methods under different polygenicity levels. The x axis is the fraction of SNPs in the genome that influence the trait of study 1.

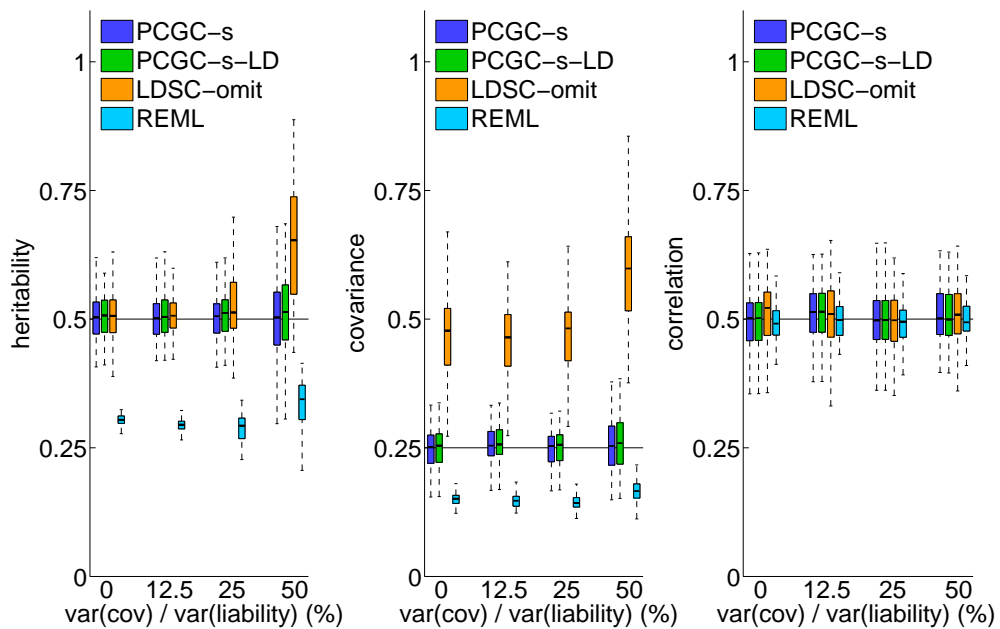

Figure S11: The performance of the evaluated methods when LDSC weights test statistics according to their postulated posterior variance (but still using a constrained intercept<sup>2</sup>), as implemented in the ldsc software<sup>2</sup>.

<sup>2</sup><https://github.com/bulik/ldsc>

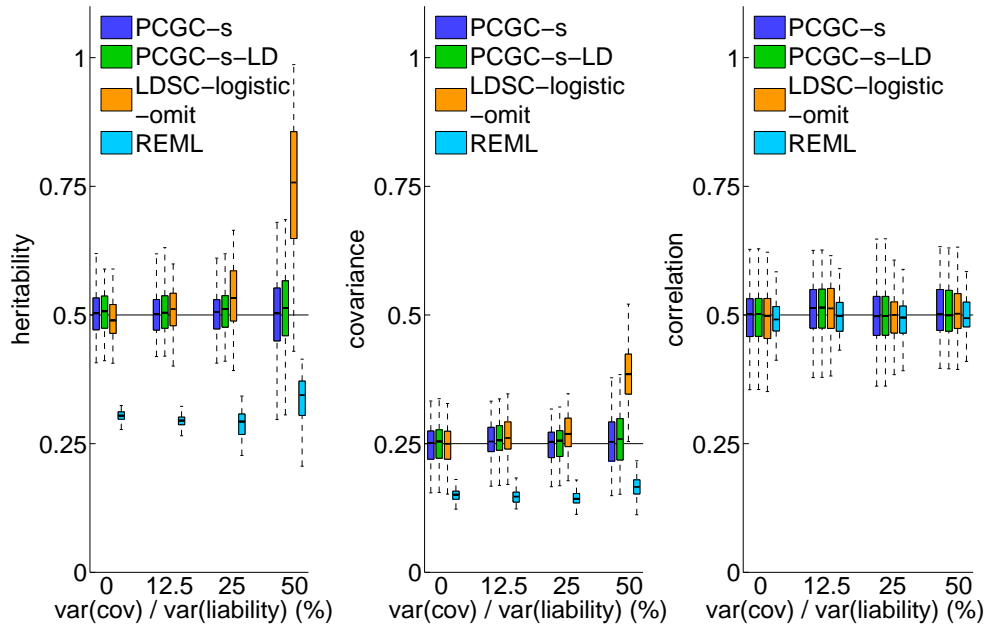

Figure S12: The performance of the evaluated methods when LDSC uses logistic regression rather than linear regression based summary statistics.

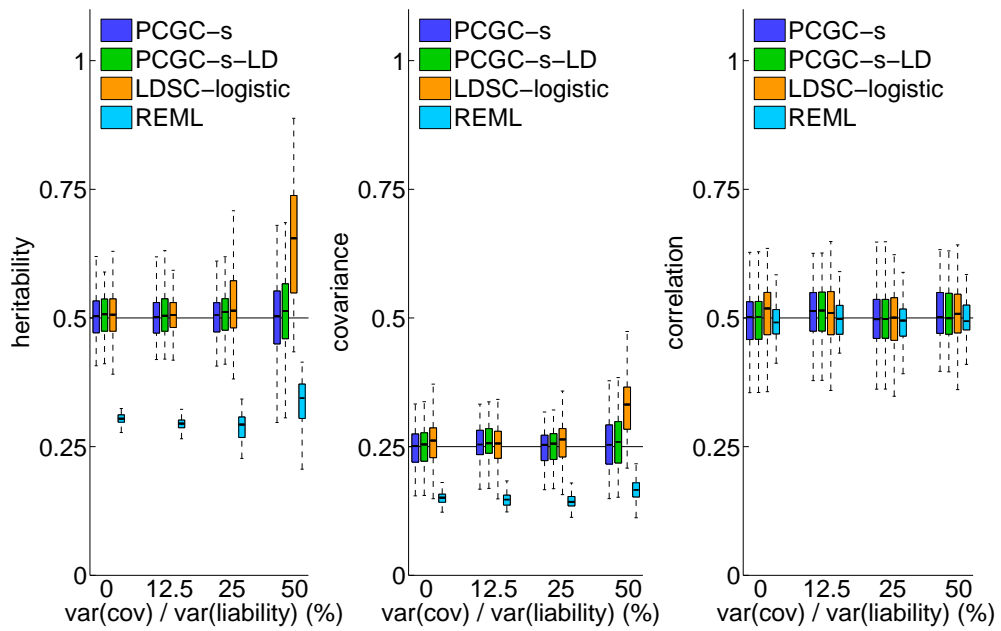

Figure S13: The performance of the evaluated methods when LDSC uses logistic regression rather than linear regression based summary statistics. Here, the logistic regression test statistics included the covariates instead of omitting them.



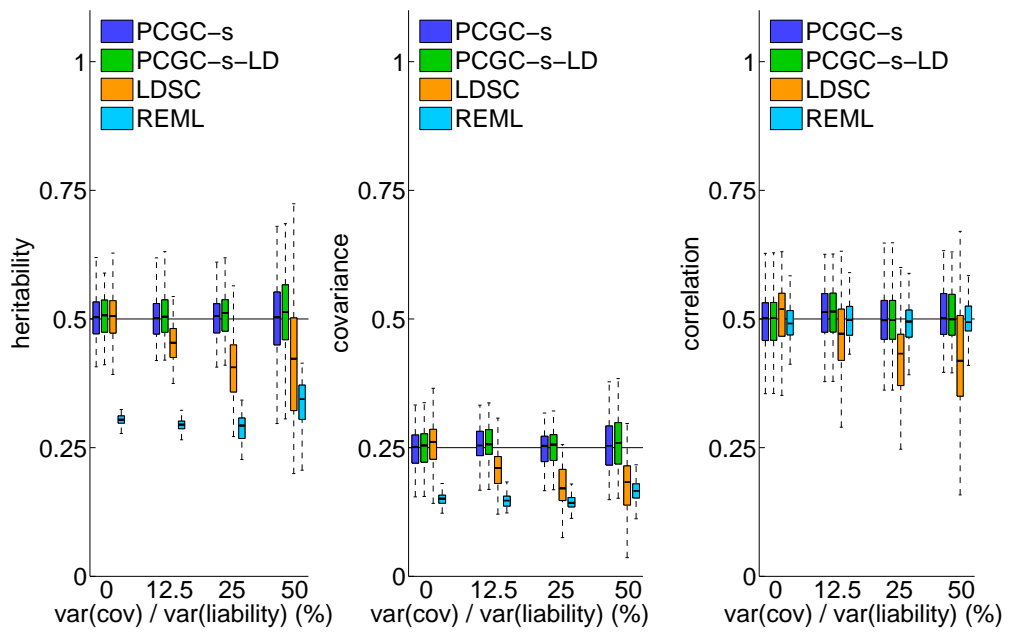

Figure S14: The performance of the evaluated methods under different levels of covariate strength, when LDSC regresses the covariates out of the phenotypes and genotypes.

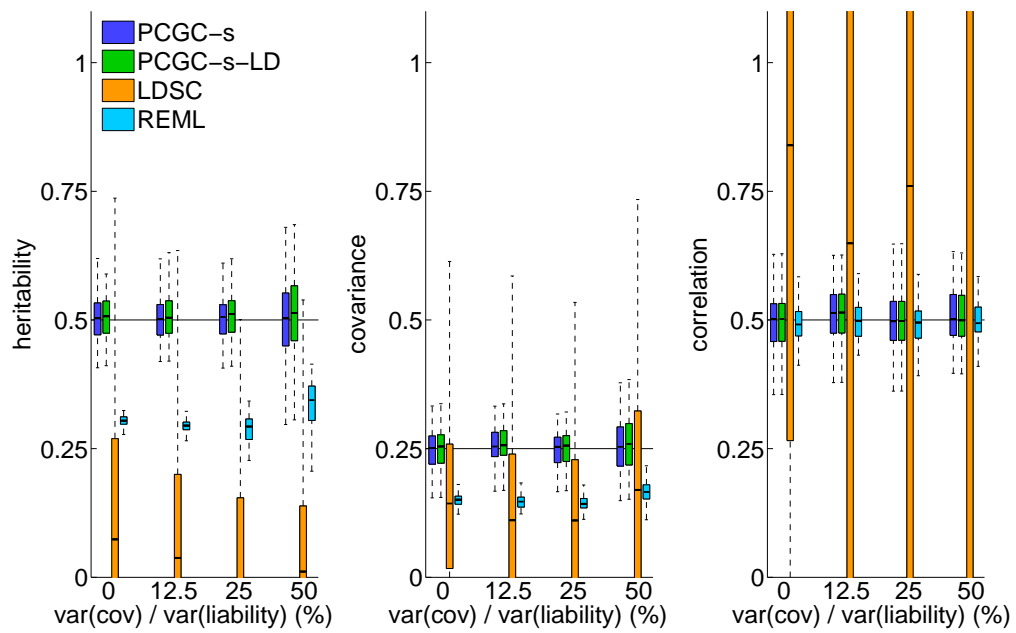

Figure S15: The performance of the evaluated methods under different levels of covariate strength, when LDSC regresses the covariates out of the phenotypes and genotypes and fits an intercept.

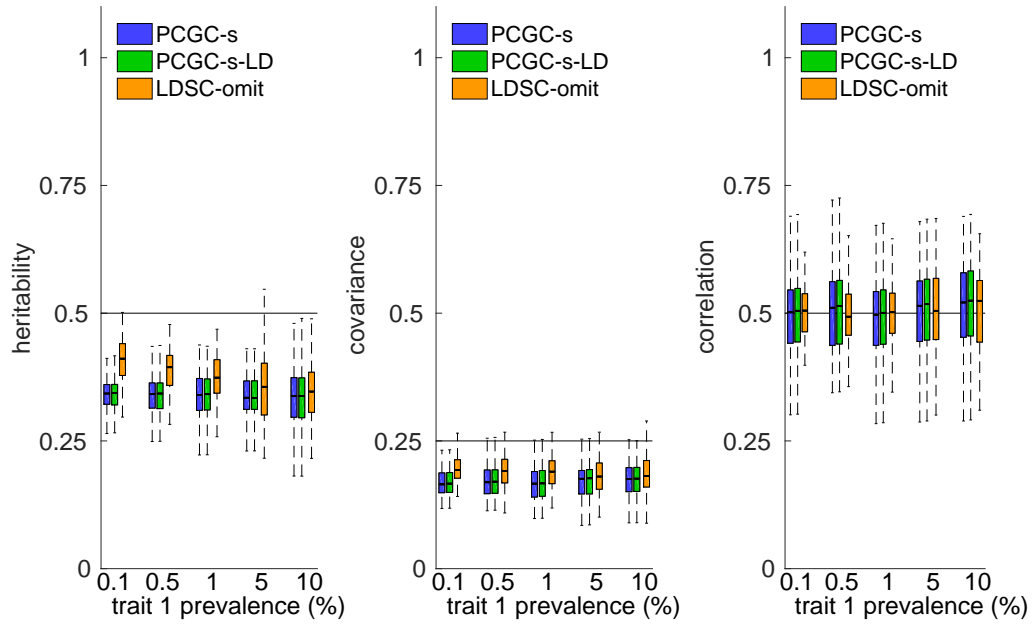

Figure S16: The performance of the evaluated methods when data is generated according to the LDAK model [6], under different prevalence levels for study 1. All methods yield biased estimates of heritability and of genetic covariance, because they use an incorrect model that assigns a uniform prior variance for the effect size of every SNP, regardless of its MAF and LD patterns. In contrast, genetic correlation estimates are unbiased, suggesting that the approximation errors of the heritabilities and of the genetic covariance are canceled when dividing the latter by the former. REML is not evaluated in this experiment because we are not aware of a REML-based method for estimation of genetic covariance under the LDAK model, which would be required for comparison with Figure S17.

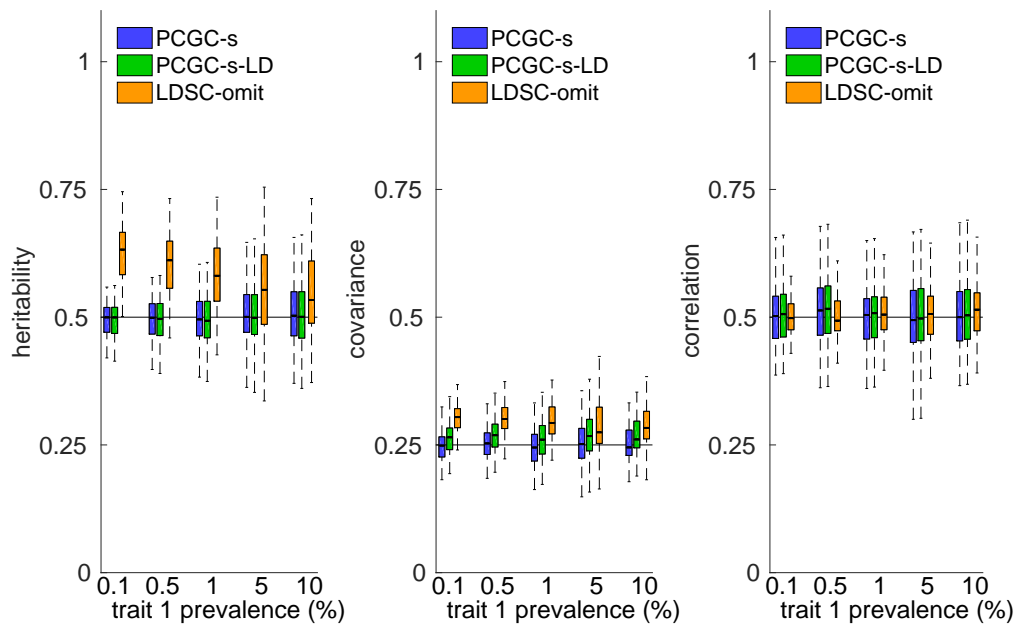

Figure S17: The performance of the evaluated methods when data is generated according to the LDAK model [6] (as in Figure S16), using modified versions of the evaluated methods which use the LDAK model for estimation. PCGC-s and PCGC-s-LD yield unbiased estimates because they use the correct underlying model, whereas LDSC-omit is biased because it ignores the effect of covariates. REML was not evaluated in this experiment because we are not aware of a REML-based method for estimation of genetic covariance under the LDAK model.

### 3 PCGC without Covariates

PCGC was described in [3] in the context of heritability estimation. Here we show the derivation for estimation of genetic covariance. This is a generalization of heritability, which in the absence of covariates can be seen as the genetic covariance of a trait with itself. We first present the derivation when there are no covariates. A derivation with covariates is presented in Section 4. The derivation here does not make use of summary statistics. A description of how PCGC can be reformulated to use summary statistics is presented in Section 5.

We first establish some notations. We assume the same mixed effects liability threshold model described in the main text. Namely, every individual is associated with a latent liability  $a_t^i$  for every studied trait  $t$ , where  $a_t^i = g_t^i + e_t^i$ , and  $g_t^i, e_t^i$  are genetic and environmental effects, respectively. We further assume  $g_t^i \sim \mathcal{N}(0, \sigma_{g_t}^2)$ ,  $e_t^i \sim \mathcal{N}(0, 1 - \sigma_{g_t}^2)$ . The environmental effects are assumed to be independent and identically distributed between individuals, and  $\text{cov}(g_{t_1}^i, g_{t_2}^j) = \rho_{t_1, t_2} G_{t_1, t_2}^{i, j}$ , where  $G_{t_1, t_2}^{i, j}$  is the genetic similarity coefficient between individual  $i$  in study  $t_1$  and individual  $j$  in study  $t_2$ . Every individual is also associated with an observed affection status indicator  $y_t^i = \mathbb{1}[a_t^i > \tau_t]$ , where  $\tau_t = \Phi^{-1}(1 - K_t)$  is the affection cutoff for a trait with prevalence  $K_t$ , and where  $\Phi^{-1}(\cdot)$  is the inverse standard normal cumulative distribution.

Note that when  $t_1$  and  $t_2$  refer to the same trait, the genetic covariance coincides with heritability,  $\rho_{t_1, t_2} = \sigma_{g_t}^2$ . Our derivation therefore encapsulates heritability estimation as a special case.

We assume an ascertained case-control study where cases are overrepresented relative to the trait prevalence. Denote  $P_t$  as the case-control proportion in study  $t$ , and define  $\tilde{y}_t^i \triangleq (y_t^i - P_t) / \sqrt{P_t(1 - P_t)}$  as the standardized phenotype of individual  $i$  in study  $t$ . Further denote  $s_t^i$  as an observed selection indicator for individual  $i$  in study  $t$ , such that  $s_t^i = 1$  for all individuals in the study. We assume that  $s_t^i$  is conditionally independent of all other variables given  $y_t^i$ . PCGC approximates the expected value of  $\tilde{y}_{t_1}^i \tilde{y}_{t_2}^j$  conditional on the ascertainment scheme and on the genetic similarity coefficient of individuals  $i$  and  $j$  via a Taylor expansion around  $G_{t_1, t_2}^{i, j} = 0$ . Namely, the first order Taylor expansion when there are no covariates is given by:

$$E \left[ \tilde{y}_{t_1}^i \tilde{y}_{t_2}^j \mid s_{t_1}^i, s_{t_2}^j, G_{t_1, t_2}^{i, j} \right] = G_{t_1, t_2}^{i, j} f(t_1, t_2) \rho_{t_1, t_2} + \mathcal{O} \left( (G_{t_1, t_2}^{i, j})^2 \right), \quad (1)$$

where  $s_t^i$  is a shorthand notation for  $s_{t_1}^i = 1$ , and where  $f(t_1, t_2)$  is given by:

$$f(t_1, t_2) = \frac{\sqrt{P_{t_1}(1 - P_{t_1})P_{t_2}(1 - P_{t_2})} \phi(\tau_{t_1}) \phi(\tau_{t_2})}{K_{t_1}(1 - K_{t_1})K_{t_2}(1 - K_{t_2})}. \quad (2)$$

Here,  $\phi(\cdot)$  is the standard normal density. Therefore,  $\rho_{t_1, t_2}$  can be estimated by regressing  $\tilde{y}_{t_1}^i \tilde{y}_{t_2}^j$  on  $G_{t_1, t_2}^{i, j} f(t_1, t_2)$ .

The derivation of Equation 1 is carried out as follows. We first write down the expected value of  $\tilde{y}_{t_1}^i \tilde{y}_{t_2}^j$  conditional on the ascertainment scheme and on the genetic similarity coefficient of individuals  $i$  and  $j$ . By using Bayes rule and the assumption that  $s_t^i$  is

conditionally independent of all other variables given  $y_t^i$ , we obtain:

$$\begin{aligned}
E \left[ \tilde{y}_{t_1}^i \tilde{y}_{t_2}^j \mid s_{t_1}^i, s_{t_2}^j, G_{t_1, t_2}^{i, j} \right] &= \sum_{y_{t_1}^i, y_{t_2}^j = 0}^1 \frac{y_{t_1}^i - P_{t_1}}{\sqrt{P_{t_1}(1-P_{t_1})}} \frac{y_{t_2}^j - P_{t_2}}{\sqrt{P_{t_2}(1-P_{t_2})}} P(y_{t_1}^i, y_{t_2}^j \mid s_{t_1}^i, s_{t_2}^j, G_{t_1, t_2}^{i, j}) \\
&= \frac{\sum_{y_{t_1}^i, y_{t_2}^j = 0}^1 \frac{y_{t_1}^i - P_{t_1}}{\sqrt{P_{t_1}(1-P_{t_1})}} \frac{y_{t_2}^j - P_{t_2}}{\sqrt{P_{t_2}(1-P_{t_2})}} P(y_{t_1}^i, y_{t_2}^j \mid G_{t_1, t_2}^{i, j}) P(s_{t_1}^i \mid y_{t_1}^i) P(s_{t_2}^j \mid y_{t_2}^j)}{P(s_{t_1}^i, s_{t_2}^j \mid G_{t_1, t_2}^{i, j})}.
\end{aligned} \tag{3}$$

Next, we approximate Equation 3 via a Taylor expansion around  $G_{t_1, t_2}^{i, j} = 0$ . Denote the numerator as  $A(G_{t_1, t_2}^{i, j})$  and the denominator as  $B(G_{t_1, t_2}^{i, j})$ . The Taylor expansion takes the form:

$$E \left[ \tilde{y}_{t_1}^i \tilde{y}_{t_2}^j \mid s_{t_1}^i, s_{t_2}^j, G_{t_1, t_2}^{i, j} \right] = \frac{A(0)}{B(0)} + \frac{A'(0)B(0) - B'(0)A(0)}{B(0)^2} G_{t_1, t_2}^{i, j} + \mathcal{O} \left( (G_{t_1, t_2}^{i, j})^2 \right). \tag{4}$$

Equation 4 can be simplified because  $A(0) = 0$ . This can be verified by noting that setting  $G_{t_1, t_2}^{i, j} = 0$  in Equation 4 yields  $A(0)/B(0)$  on the one hand, but setting  $G_{t_1, t_2}^{i, j} = 0$  also causes the random variables  $\tilde{y}_{t_1}^i, \tilde{y}_{t_2}^j$  to become independent conditional on  $s_{t_1}^i, s_{t_2}^j$ , and therefore leads to the decomposition:

$$E \left[ \tilde{y}_{t_1}^i \tilde{y}_{t_2}^j \mid s_{t_1}^i, s_{t_2}^j, G_{t_1, t_2}^{i, j} = 0 \right] = E \left[ \tilde{y}_{t_1}^i \mid s_{t_1}^i \right] E \left[ \tilde{y}_{t_2}^j \mid s_{t_2}^j \right] = 0, \tag{5}$$

because  $E \left[ \tilde{y}_t^i \mid s_t^i \right] = 0$  by definition.

We conclude that the Taylor expansion takes the form:

$$E \left[ \tilde{y}_{t_1}^i \tilde{y}_{t_2}^j \mid s_{t_1}^i, s_{t_2}^j, G_{t_1, t_2}^{i, j} \right] = \frac{A'(0)}{B(0)} G_{t_1, t_2}^{i, j} + \mathcal{O} \left( (G_{t_1, t_2}^{i, j})^2 \right). \tag{6}$$

To compute  $B(0)$ , we first compute the probability of cases and controls to participate in the study. Define  $s_{t,0} = P(s_t^i = 1 \mid y_t^i = 0)$ ,  $s_{t,1} = P(s_t^i = 1 \mid y_t^i = 1)$  as the selection probabilities of controls and cases, respectively. Using the definition of  $P_t$  and Bayes rule, we have:

$$\begin{aligned}
P_t = P(y_t^i = 1 \mid s_t^i = 1) &= \frac{P(y_t^i = 1)P(s_t^i = 1 \mid y_t^i = 1)}{P(y_t^i = 0)P(s_t^i = 1 \mid y_t^i = 0) + P(y_t^i = 1)P(s_t^i = 1 \mid y_t^i = 1)} \\
&= \frac{K_t s_{t,1}}{(1 - K_t) s_{t,0} + K_t s_{t,1}}.
\end{aligned} \tag{7}$$

After rearrangement, we obtain:

$$s_{t,0} = s_{t,1} \frac{K_t(1 - P_t)}{(1 - K_t)P_t}. \tag{8}$$

We assume without loss of generalization that  $s_{t,1} = 1$ , but the results remain exactly the same regardless.

Next, we use the fact that the variables  $s_{t_1}^i, s_{t_2}^j$  become independent given  $G_{t_1, t_2}^{i, j} = 0$ .

Therefore, by using Equation 8,  $B(0)$  is given by:

$$\begin{aligned}
B(0) &= P(s_{t_1}^i)P(s_{t_2}^j) \\
&= \left( P(y_{t_1}^i = 0)s_{t_1,0} + P(y_{t_1}^i = 1)s_{t_1,1} \right) \left( P(y_{t_2}^j = 0)s_{t_2,0} + P(y_{t_2}^j = 1)s_{t_2,1} \right) \\
&= \left( (1 - K_{t_1}) \frac{K_{t_1}(1 - P_{t_1})}{(1 - K_{t_1})P_{t_1}} + K_{t_1} \right) \left( (1 - K_{t_2}) \frac{K_{t_2}(1 - P_{t_2})}{(1 - K_{t_2})P_{t_2}} + K_{t_2} \right) \\
&= \frac{K_{t_1} K_{t_2}}{P_{t_1} P_{t_2}}.
\end{aligned} \tag{9}$$

It remains to derive  $A'(0)$ . We use the following lemma, derived in Section 2.2 of [3]. If the affection cutoffs of individuals  $i$  and  $j$  are  $\tau_{t_1}$  and  $\tau_{t_2}$ , respectively, then:

$$\begin{aligned}
\frac{d}{dG_{t_1,t_2}^{i,j}} P(y_{t_1}^i = y_{t_2}^j | G_{t_1,t_2}^{i,j}) |_{G_{t_1,t_2}^{i,j}=0} &= \phi(\tau_{t_1})\phi(\tau_{t_2})\rho_{t_1,t_2} \\
\frac{d}{dG_{t_1,t_2}^{i,j}} P(y_{t_1}^i \neq y_{t_2}^j | G_{t_1,t_2}^{i,j}) |_{G_{t_1,t_2}^{i,j}=0} &= -\phi(\tau_{t_1})\phi(\tau_{t_2})\rho_{t_1,t_2}.
\end{aligned} \tag{10}$$

Therefore,  $A'(0)$  is explicitly given by:

$$\begin{aligned}
A'(0) &= \sqrt{\frac{P_{t_1}}{1 - P_{t_1}} \frac{P_{t_2}}{1 - P_{t_2}}} s_{t_1,0} s_{t_2,0} \phi(\tau_{t_1})\phi(\tau_{t_2})\rho_{t_1,t_2} \\
&\quad + \sqrt{\frac{P_{t_1}}{1 - P_{t_1}} \frac{1 - P_{t_2}}{P_{t_2}}} s_{t_1,0} s_{t_2,1} \phi(\tau_{t_1})\phi(\tau_{t_2})\rho_{t_1,t_2} \\
&\quad + \sqrt{\frac{1 - P_{t_1}}{P_{t_1}} \frac{P_{t_2}}{1 - P_{t_2}}} s_{t_1,1} s_{t_2,0} \phi(\tau_{t_1})\phi(\tau_{t_2})\rho_{t_1,t_2} \\
&\quad + \sqrt{\frac{1 - P_{t_1}}{P_{t_1}} \frac{1 - P_{t_2}}{P_{t_2}}} s_{t_1,1} s_{t_2,1} \phi(\tau_{t_1})\phi(\tau_{t_2})\rho_{t_1,t_2}.
\end{aligned} \tag{11}$$

By incorporating the definition of  $s_{t,0}$  in Equation 8 and assuming  $s_{t,1} = 1$ , we obtain:

$$\begin{aligned}
A'(0) &= \frac{K_{t_1}}{1 - K_{t_1}} \frac{K_{t_2}}{1 - K_{t_2}} \sqrt{\frac{1 - P_{t_1}}{P_{t_1}} \frac{1 - P_{t_2}}{P_{t_2}}} \phi(\tau_{t_1})\phi(\tau_{t_2})\rho_{t_1,t_2} \\
&\quad + \frac{K_{t_1}}{1 - K_{t_1}} \sqrt{\frac{1 - P_{t_1}}{P_{t_1}} \frac{1 - P_{t_2}}{P_{t_2}}} \phi(\tau_{t_1})\phi(\tau_{t_2})\rho_{t_1,t_2} \\
&\quad + \frac{K_{t_2}}{1 - K_{t_2}} \sqrt{\frac{1 - P_{t_1}}{P_{t_1}} \frac{1 - P_{t_2}}{P_{t_2}}} \phi(\tau_{t_1})\phi(\tau_{t_2})\rho_{t_1,t_2} \\
&\quad + \sqrt{\frac{1 - P_{t_1}}{P_{t_1}} \frac{1 - P_{t_2}}{P_{t_2}}} \phi(\tau_{t_1})\phi(\tau_{t_2})\rho_{t_1,t_2} \\
&= \frac{\sqrt{\frac{(1 - P_{t_1})(1 - P_{t_2})}{P_{t_1} P_{t_2}}} \phi(\tau_{t_1})\phi(\tau_{t_2})\rho_{t_1,t_2}}{(1 - K_{t_1})(1 - K_{t_2})}.
\end{aligned} \tag{12}$$

Finally, we combine Equations 9 and 12 into Equation 6 to obtain:

$$\begin{aligned}
E \left[ \tilde{y}_{t_1}^i \tilde{y}_{t_2}^j | s_{t_1}^i, s_{t_2}^j, G_{t_1,t_2}^{i,j} \right] &= \frac{\sqrt{\frac{(1 - P_{t_1})(1 - P_{t_2})}{P_{t_1} P_{t_2}}} \phi(\tau_{t_1})\phi(\tau_{t_2})\rho_{t_1,t_2}}{(1 - K_{t_1})(1 - K_{t_2})} G_{t_1,t_2}^{i,j} + \mathcal{O} \left( (G_{t_1,t_2}^{i,j})^2 \right) \\
&= \frac{\sqrt{P_{t_1}(1 - P_{t_1})P_{t_2}(1 - P_{t_2})} \phi(\tau_{t_1})\phi(\tau_{t_2}) G_{t_1,t_2}^{i,j}}{K_{t_1}(1 - K_{t_1})K_{t_2}(1 - K_{t_2})} \rho_{t_1,t_2} + \mathcal{O} \left( (G_{t_1,t_2}^{i,j})^2 \right).
\end{aligned} \tag{13}$$

This completes the derivation.

## 4 PCGC with Covariates

Here we derive the PCGC genetic covariance estimator in the presence of covariates. We extend the model presented in the previous section as follows. We assume that every individual in study  $t$  carries a vector of covariates  $\mathbf{C}_t^i$ , including an intercept. The liability  $a_t^i$  is now given by  $a_t^i = g_t^i + e_t^i + (\mathbf{C}_t^i)^T \boldsymbol{\beta}_t$ , where  $\boldsymbol{\beta}_t$  is a vector of fixed effects. Denote  $P_t^i$  as the in-sample probability of individual  $i$  in study  $t$  being a case conditional on her covariates,  $P_t^i = P(y_t^i = 1 \mid \mathbf{C}_t^i, s_t^i = 1; \boldsymbol{\beta}_t)$ . We define the standardized phenotype of individual  $i$  as  $\tilde{y}_t^i = (y_t^i - P_t^i) / \sqrt{P_t^i(1 - P_t^i)}$ .

We show below that the first order Taylor expansion of the conditional expectation of  $\tilde{y}_{t_1}^i \tilde{y}_{t_2}^j$  is now given by:

$$\begin{aligned} E \left[ \tilde{y}_{t_1}^i \tilde{y}_{t_2}^j \mid \mathbf{C}_{t_1}^i, \mathbf{C}_{t_2}^j, s_{t_1}^i, s_{t_2}^j, G_{t_1, t_2}^{i, j} \right] \\ = G_{t_1, t_2}^{i, j} f \left( \mathbf{C}_{t_1}^i, \mathbf{C}_{t_2}^j; \boldsymbol{\beta}_{t_1}, \boldsymbol{\beta}_{t_2}, t_1, t_2 \right) \rho_{t_1, t_2} + \mathcal{O} \left( \left( G_{t_1, t_2}^{i, j} \right)^2 \right), \end{aligned} \quad (14)$$

where  $f \left( \mathbf{C}_{t_1}^i, \mathbf{C}_{t_2}^j; \boldsymbol{\beta}_{t_1}, \boldsymbol{\beta}_{t_2}, t_1, t_2 \right)$  depends on the covariates of individuals  $i$  and  $j$ , on the fixed effects and on the case-control proportions and the prevalences of the two studied traits, and is explicitly given by:

$$\begin{aligned} f \left( \mathbf{C}_{t_1}^i, \mathbf{C}_{t_2}^j; \boldsymbol{\beta}_{t_1}, \boldsymbol{\beta}_{t_2}, t_1, t_2 \right) \triangleq & \frac{\phi(\tau_{t_1}^i)}{\sqrt{P_{t_1}^i(1 - P_{t_1}^i)} \left( K_{t_1}^i + (1 - K_{t_1}^i) \frac{K_{t_1}(1 - P_{t_1})}{P_{t_1}(1 - K_{t_1})} \right)} \\ & \frac{\phi(\tau_{t_2}^j)}{\sqrt{P_{t_2}^j(1 - P_{t_2}^j)} \left( K_{t_2}^j + (1 - K_{t_2}^j) \frac{K_{t_2}(1 - P_{t_2})}{P_{t_2}(1 - K_{t_2})} \right)} \\ & \left[ q_{t_1, t_2; 0, 0}^{i, j} + q_{t_1, t_2; 0, 1}^{i, j} + q_{t_1, t_2; 1, 0}^{i, j} + q_{t_1, t_2; 1, 1}^{i, j} \right], \end{aligned} \quad (15)$$

where  $K_t^i = 1 - (1 - P_t^i) / \left( 1 + \frac{K_t(1 - P_t)}{P_t(1 - K_t)} P_t^i - P_t^i \right)$  is the population-level probability of being a case (derived in [3]),  $\tau_t^i = \Phi^{-1} (1 - K_t^i)$  is the individual-level affection cutoff, and the terms in the parentheses are given by:

$$\begin{aligned} q_{t_1, t_2; 0, 0}^{i, j} &= \frac{K_{t_1}(1 - P_{t_1})}{P_{t_1}(1 - K_{t_1})} \frac{K_{t_2}(1 - P_{t_2})}{P_{t_2}(1 - K_{t_2})} P_{t_1}^i P_{t_2}^j. \\ q_{t_1, t_2; 0, 1}^{i, j} &= \frac{K_{t_1}(1 - P_{t_1})}{P_{t_1}(1 - K_{t_1})} P_{t_1}^i (1 - P_{t_2}^j) \\ q_{t_1, t_2; 1, 0}^{i, j} &= \frac{K_{t_2}(1 - P_{t_2})}{P_{t_2}(1 - K_{t_2})} (1 - P_{t_1}^i) P_{t_2}^j \\ q_{t_1, t_2; 1, 1}^{i, j} &= (1 - P_{t_1}^i) (1 - P_{t_2}^j). \end{aligned} \quad (16)$$

Unlike the previous section, the term  $f \left( \mathbf{C}_{t_1}^i, \mathbf{C}_{t_2}^j; \boldsymbol{\beta}_{t_1}, \boldsymbol{\beta}_{t_2}, t_1, t_2 \right)$  is different for every pair of individuals. We first derive Equation 14 under the assumption that the fixed effects are known, and then describe estimation with unknown fixed effects.

The derivation of Equation 14 is carried out as follows. As before, we begin by writing down the conditional expectation of  $\tilde{y}_{t_1}^i \tilde{y}_{t_2}^j$  and use Bayes rule and the conditional

independence assumptions to obtain:

$$\begin{aligned}
E \left[ \tilde{y}_{t_1}^i \tilde{y}_{t_2}^j \mid \mathbf{C}_{t_1}^i, \mathbf{C}_{t_2}^j, s_{t_1}^i, s_{t_2}^j, G_{t_1, t_2}^{i, j} \right] &= \\
\sum_{y_{t_1}^i, y_{t_2}^j=0}^1 \frac{y_{t_1}^i - P_{t_1}^i}{\sqrt{P_{t_1}^i(1-P_{t_1}^i)}} \frac{y_{t_2}^j - P_{t_2}^j}{\sqrt{P_{t_2}^j(1-P_{t_2}^j)}} P(y_{t_1}^i, y_{t_2}^j \mid \mathbf{C}_{t_1}^i, \mathbf{C}_{t_2}^j, s_{t_1}^i, s_{t_2}^j, G_{t_1, t_2}^{i, j}) & \\
\sum_{y_{t_1}^i, y_{t_2}^j=0}^1 \frac{y_{t_1}^i - P_{t_1}^i}{\sqrt{P_{t_1}^i(1-P_{t_1}^i)}} \frac{y_{t_2}^j - P_{t_2}^j}{\sqrt{P_{t_2}^j(1-P_{t_2}^j)}} P(y_{t_1}^i, y_{t_2}^j \mid \mathbf{C}_{t_1}^i, \mathbf{C}_{t_2}^j, G_{t_1, t_2}^{i, j}) P(s_{t_1}^i \mid y_{t_1}^i) P(s_{t_2}^j \mid y_{t_2}^j) & \\
= \frac{\sum_{y_{t_1}^i, y_{t_2}^j=0}^1 \frac{y_{t_1}^i - P_{t_1}^i}{\sqrt{P_{t_1}^i(1-P_{t_1}^i)}} \frac{y_{t_2}^j - P_{t_2}^j}{\sqrt{P_{t_2}^j(1-P_{t_2}^j)}} P(y_{t_1}^i, y_{t_2}^j \mid \mathbf{C}_{t_1}^i, \mathbf{C}_{t_2}^j, G_{t_1, t_2}^{i, j}) P(s_{t_1}^i \mid y_{t_1}^i) P(s_{t_2}^j \mid y_{t_2}^j)}{P(s_{t_1}^i, s_{t_2}^j \mid \mathbf{C}_{t_1}^i, \mathbf{C}_{t_2}^j, G_{t_1, t_2}^{i, j})} & .
\end{aligned} \tag{17}$$

Next, we approximate Equation 17 via a Taylor expansion around  $G_{t_1, t_2}^{i, j} = 0$ . As before, we denote the numerator and denominator as  $A(G_{t_1, t_2}^{i, j})$  and  $B(G_{t_1, t_2}^{i, j})$ , respectively. The term  $A(0)$  is once again equal to 0, as can be verified by seeing that setting  $G_{t_1, t_2}^{i, j} = 0$  in the first order Taylor expansion of the expression  $A(G_{t_1, t_2}^{i, j})/B(G_{t_1, t_2}^{i, j})$  leads to the expression  $A(0)/B(0)$  on the one hand, but that the conditional expectation  $E \left[ \tilde{y}_{t_1}^i \tilde{y}_{t_2}^j \mid \mathbf{C}_{t_1}^i, \mathbf{C}_{t_2}^j, s_{t_1}^i, s_{t_2}^j, G_{t_1, t_2}^{i, j} = 0 \right]$  decomposes into a product of conditional expectations of  $\tilde{y}_{t_1}^i$  and of  $\tilde{y}_{t_2}^j$ , each of which is equal to 0 by definition. We therefore once again have a Taylor expansion of the form:

$$E \left[ \tilde{y}_{t_1}^i \tilde{y}_{t_2}^j \mid \mathbf{C}_{t_1}^i, \mathbf{C}_{t_2}^j, s_{t_1}^i, s_{t_2}^j, G_{t_1, t_2}^{i, j} \right] = \frac{A'(0)}{B(0)} G_{t_1, t_2}^{i, j} + \mathcal{O} \left( (G_{t_1, t_2}^{i, j})^2 \right). \tag{18}$$

To compute  $B(0)$ , we use the fact that the variables  $s_{t_1}^i, s_{t_2}^j$  become independent given  $G_{t_1, t_2}^{i, j} = 0$  and the covariates. Therefore, by using Equation 8,  $B(0)$  is given by:

$$\begin{aligned}
B(0) &= P(s_{t_1}^i \mid \mathbf{C}_{t_1}^i) P(s_{t_2}^j \mid \mathbf{C}_{t_2}^j) \\
&= \left( K_{t_1}^i + (1 - K_{t_1}^i) \frac{K_{t_1}(1 - P_{t_1})}{(1 - K_{t_1})P_{t_1}} \right) \left( K_{t_2}^j + (1 - K_{t_2}^j) \frac{K_{t_2}(1 - P_{t_2})}{(1 - K_{t_2})P_{t_2}} \right).
\end{aligned} \tag{19}$$

To compute  $A'(0)$ , we rewrite the numerator of Equation 17 using the results in Equation 10, and additionally incorporate Equation 8 as follows:

$$\begin{aligned}
A'(0) &= \frac{P_{t_1}^i P_{t_2}^j}{\sqrt{P_{t_1}^i(1-P_{t_1}^i)P_{t_2}^j(1-P_{t_2}^j)}} \frac{K_{t_1}(1-P_{t_1})}{P_{t_1}(1-K_{t_1})} \frac{K_{t_2}(1-P_{t_2})}{P_{t_2}(1-K_{t_2})} \phi(\tau_{t_1}^i) \phi(\tau_{t_2}^j) \rho_{t_1, t_2} \\
&+ \frac{P_{t_1}^i(1-P_{t_2}^j)}{\sqrt{P_{t_1}^i(1-P_{t_1}^i)P_{t_2}^j(1-P_{t_2}^j)}} \frac{K_{t_1}(1-P_{t_1})}{P_{t_1}(1-K_{t_1})} \phi(\tau_{t_1}^i) \phi(\tau_{t_2}^j) \rho_{t_1, t_2} \\
&+ \frac{(1-P_{t_1}^i)P_{t_2}^j}{\sqrt{P_{t_1}^i(1-P_{t_1}^i)P_{t_2}^j(1-P_{t_2}^j)}} \frac{K_{t_2}(1-P_{t_2})}{P_{t_2}(1-K_{t_2})} \phi(\tau_{t_1}^i) \phi(\tau_{t_2}^j) \rho_{t_1, t_2} \phi(\tau_{t_1}^i) \phi(\tau_{t_2}^j) \rho_{t_1, t_2} \\
&+ \frac{(1-P_{t_1}^i)(1-P_{t_2}^j)}{\sqrt{P_{t_1}^i(1-P_{t_1}^i)P_{t_2}^j(1-P_{t_2}^j)}} \phi(\tau_{t_1}^i) \phi(\tau_{t_2}^j) \rho_{t_1, t_2}.
\end{aligned} \tag{20}$$

Equation 14 is obtained by combining Equations 19 and 20 into Equation 18. This completes the derivation.

When the fixed effects are unknown we carry out a two steps procedure, as explained in [3]. In the first stage we estimate the fixed effects while ignoring the covariance



structure via logistic regression. The theory of generalized estimating equations shows that such an estimation procedure tends to produce highly accurate estimates [4] (the formula for the variance of the estimators needs to be modified to account for the covariance structure, but this is out of the scope of our work). In the second stage we use the estimated fixed effects to compute a conditional in-sample affection probability  $P_t^i = P(y_t^i = 1 | C_t^i, s_{t_1}^i; \beta)$ , which enables us to use the Taylor approximation described above.

## 5 Adapting PCGC to use Summary Statistics

Here we describe how PCGC can be modified to use summary statistics. Our derivation assumes the presence of covariates. Settings without covariates can be regarded as a special case with a single constant covariate carried by all individuals (a so-called intercept). To avoid dependency on the previous section, we first reestablish the relevant notations.

Denote  $P_t$  as the proportion of cases in study  $t$  and  $P_t^i$  as the in-sample probability of individual  $i$  in study  $t$  of being a case conditional on her covariates. Further denote  $K_t^i = 1 - (1 - P_t^i) / \left(1 + \frac{K_t(1-P_t)}{P_t(1-K_t)} P_t^i - P_t^i\right)$  as the population-level probability of being a case, and define  $\tau_t^i = \Phi^{-1}(1 - K_t^i)$ . Note that in the absence of covariates  $P_t^i = P_t$ ,  $K_t^i = K_t$  and  $\tau_t^i = \tau_t$  for all individuals.

The PCGC covariance estimator is given by regressing the conditionally-standardized phenotype products  $\frac{y_{t_1}^i - P_{t_1}^i}{\sqrt{P_{t_1}^i(1-P_{t_1}^i)}} \frac{y_{t_2}^j - P_{t_2}^j}{\sqrt{P_{t_2}^j(1-P_{t_2}^j)}}$  on the conditionally-modified genotype products  $G_{t_1,t_2}^{i,j} Q_{t_1,t_2}^{i,j}$ , where  $Q_{t_1,t_2}^{i,j}$  is given by:

$$Q_{t_1,t_2}^{i,j} \triangleq \sum_{a,b=0}^1 u_{t_1,a}^i u_{t_2,b}^j, \quad (21)$$

where

$$u_{t,0}^i \triangleq \frac{\phi(\tau_t^i)}{\sqrt{P_t^i(1-P_t^i)} \left(K_t^i + (1-K_t^i) \frac{K_t(1-P_t)}{P_t(1-K_t)}\right)} \frac{K_t(1-P_t)}{P_t(1-K_t)} P_t^i \quad (22)$$

$$u_{t,1}^i \triangleq \frac{\phi(\tau_t^i)}{\sqrt{P_t^i(1-P_t^i)} \left(K_t^i + (1-K_t^i) \frac{K_t(1-P_t)}{P_t(1-K_t)}\right)} (1-P_t^i). \quad (23)$$

Note that each term  $u_{t,0}^i$  and  $u_{t,1}^i$  depends only on information from study  $t$ .

A key ingredient in the adaptation of PCGC for summary statistics is the assumed form of the genetic similarity coefficients:

$$G_{t_1,t_2}^{i,j} \triangleq \frac{1}{m} \sum_{k=1}^m X_{t_1}^{k,i} X_{t_2}^{k,j}, \quad (24)$$

where  $X_t^{k,i}$  is the  $k$ th variant carried by individual  $i$  in study  $t$ , after normalization at the population level. Therefore, both  $G_{t_1,t_2}^{i,j}$  and  $Q_{t_1,t_2}^{i,j}$  are given by sums of products of terms, where each term depends only on an individual from one of the two studies. This is the underlying idea that enables to compute the PCGC estimator via summary

statistics. However, we note that it is straightforward to extend our results to accommodate frequency or LD-dependent architectures or multiple variance components, as shown in Sections 6 and 7.

We now provide the full derivation of our results. The PCGC covariance estimator is explicitly given by:

$$\hat{\rho}_{t_1, t_2}^{\text{pcgc-covar}} = \frac{\sum_{i, j \notin S_{t_1, t_2}} \tilde{y}_{t_1}^i \tilde{y}_{t_2}^j G_{t_1, t_2}^{i, j} Q_{t_1, t_2}^{i, j}}{\sum_{i, j \notin S_{t_1, t_2}} \left( G_{t_1, t_2}^{i, j} Q_{t_1, t_2}^{i, j} \right)^2}, \quad (25)$$

where  $S_{t_1, t_2}$  is the set of all pairs of indices  $i, j$  that refer to the same individual who is shared between the two studies, and  $\tilde{y}_t^i \triangleq \frac{y_{t_1}^i - P_{t_1}^i}{\sqrt{P_{t_1}^i (1 - P_{t_1}^i)}}$ .

To compute Equation 25 without having access to genetic and phenotypic data, we require the following summary statistics:

$$\begin{aligned} z_t^{k, \text{covar}} &\triangleq \sum_i \tilde{y}_t^i X_t^{k, i} \sum_{a=0}^1 u_{t, a}^i \\ \hat{r}_t^{k, h, \text{covar}} &\triangleq \sum_i X_t^{k, i} X_t^{h, i} \sum_{a, b=0}^1 u_{t, a}^i u_{t, b}^i. \end{aligned} \quad (26)$$

If the two studies include overlapping individuals, we also require the following summary statistics for each of the overlapping individuals:

$$w_t^i \triangleq \sqrt{G_{t, t}^{i, i} \tilde{y}_t^i} \left( \sum_{a=0}^1 u_{t, a}^i \right). \quad (27)$$

The summary statistic  $w_t^i$  are not privacy preserving because they expose (a noisy version of) the phenotype of individual  $i$ , and some indirect information about her covariates. This is often not a problem, because overlapping individuals often consist of control cohorts, in which the phenotypes are already known. Nevertheless, we propose a privacy-preserving approximation in Section 5.2.

We now describe how Equation 25 can be rewritten to use only the above summary statistics. The numerator of Equation 25 can be rewritten to use only summary statistics as follows. We first decompose the numerator into two terms:

$$\sum_{i, j \notin S_{t_1, t_2}} \tilde{y}_{t_1}^i \tilde{y}_{t_2}^j G_{t_1, t_2}^{i, j} Q_{t_1, t_2}^{i, j} = \sum_{i, j} \tilde{y}_{t_1}^i \tilde{y}_{t_2}^j G_{t_1, t_2}^{i, j} Q_{t_1, t_2}^{i, j} - \sum_{i, j \in S_{t_1, t_2}} \tilde{y}_{t_1}^i \tilde{y}_{t_2}^j G_{t_1, t_2}^{i, j} Q_{t_1, t_2}^{i, j}. \quad (28)$$

We will handle each term separately. By using Equations 24 and 21, the first term on the right hand side of Equation 28 can be reformulated as follows:

$$\begin{aligned} \sum_{i, j} \tilde{y}_{t_1}^i \tilde{y}_{t_2}^j G_{t_1, t_2}^{i, j} Q_{t_1, t_2}^{i, j} &= \sum_{i, j} \tilde{y}_{t_1}^i \tilde{y}_{t_2}^j \left( \frac{1}{m} \sum_{k=1}^m X_{t_1}^{k, i} X_{t_2}^{k, j} \right) \left( \sum_{a, b=0}^1 u_{t_1, a}^i u_{t_2, b}^j \right) \\ &= \frac{1}{m} \sum_{k=1}^m \left( \sum_i \tilde{y}_{t_1}^i X_{t_1}^{k, i} \sum_{a=0}^1 u_{t_1, a}^i \right) \left( \sum_j \tilde{y}_{t_2}^j X_{t_2}^{k, j} \sum_{b=0}^1 u_{t_2, b}^j \right) \\ &= \frac{1}{m} \sum_{k=1}^m z_{t_1}^{k, \text{covar}} z_{t_2}^{k, \text{covar}}. \end{aligned} \quad (29)$$

Using Equations 21 and 27, the second term on the right hand side of Equation 28 can be rewritten as follows:

$$\begin{aligned}
\sum_{i,j \in S_{t_1,t_2}} \tilde{y}_{t_1}^i \tilde{y}_{t_2}^j G_{t_1,t_2}^{i,j} Q_{t_1,t_2}^{i,j} &= \sum_{i,j \in S_{t_1,t_2}} \tilde{y}_{t_1}^i \tilde{y}_{t_2}^j \sqrt{G_{t_1,t_1}^{i,i} G_{t_2,t_2}^{j,j}} \sum_{a,b=0}^1 u_{t_1,a}^i u_{t_2,b}^j \\
&= \sum_{i,j \in S_{t_1,t_2}} \left( \sqrt{G_{t_1,t_1}^{i,i}} \tilde{y}_{t_1}^i \sum_{a=0}^1 u_{t_1,a}^i \right) \left( \sqrt{G_{t_2,t_2}^{j,j}} \tilde{y}_{t_2}^j \sum_{b=0}^1 u_{t_2,b}^j \right) \\
&= \sum_{i,j \in S_{t_1,t_2}} w_{t_1}^i w_{t_2}^j. \tag{30}
\end{aligned}$$

The derivation in Equation 30 requires having access to the genotypes and covariates of overlapping individuals. If there are no covariates and the number of overlapping individuals having each of the four possible combinations of phenotypes is known, Equation 30 can be simplified considerably by using the approximation  $G_{t_1,t_2}^{i,j} \approx 1.0$  for overlapping individuals. However, we caution that this approximation is very sensitive to the data preprocessing, because  $G_{t_1,t_2}^{i,j} \neq \sqrt{G_{t_1,t_1}^{i,i}} \sqrt{G_{t_2,t_2}^{j,j}}$  if studies  $t_1, t_2$  were preprocessed separately (see Supplemental section on the effects of preprocessing the data for a discussion of this issue).

If a third party with no access to the overlapping individuals wishes to approximate the second term on the right hand side of Equation 28, she may do so using a sum of Taylor Expansions around the mean covariates vector for each of the four possible combinations of phenotypes of overlapping individuals. Typically the only overlapping individuals are controls, which simplifies this approximation. The derivation is provided in Section 5.2.

We now consider the denominator of Equation 25. As in the analysis of the numerator, we first decompose the denominator into two terms:

$$\sum_{i,j \notin S_{t_1,t_2}} \left( G_{t_1,t_2}^{i,j} Q_{t_1,t_2}^{i,j} \right)^2 = \sum_{i,j} \left( G_{t_1,t_2}^{i,j} Q_{t_1,t_2}^{i,j} \right)^2 - \sum_{i,j \in S_{t_1,t_2}} \left( G_{t_1,t_2}^{i,j} Q_{t_1,t_2}^{i,j} \right)^2. \tag{31}$$

As before, we will handle each term separately. The first term on the right hand side of Equation 31 can be reformulated as follows:

$$\begin{aligned}
\sum_{i,j} \left( G_{t_1,t_2}^{i,j} Q_{t_1,t_2}^{i,j} \right)^2 &= \sum_{i,j} \left( \left( \frac{1}{m} \sum_{k=1}^m X_{t_1}^{k,i} X_{t_2}^{k,j} \right) \left( \sum_{a,b=0}^1 u_{t_1,a}^i u_{t_2,b}^j \right) \right)^2 \\
&= \frac{1}{m_2} \sum_{i,j} \left( \sum_{k,h=1}^m X_{t_1}^{k,i} X_{t_2}^{k,j} X_{t_1}^{h,i} X_{t_2}^{h,j} \right) \left( \sum_{a,b,c,d=0}^1 u_{t_1,a}^i u_{t_2,b}^j u_{t_1,c}^i u_{t_2,d}^j \right) \\
&= \frac{1}{m_2} \sum_{k,h=1}^m \left( \sum_i X_{t_1}^{k,i} X_{t_1}^{h,i} \sum_{a,c=0}^1 u_{t_1,a}^i u_{t_1,c}^i \right) \left( \sum_j X_{t_2}^{k,j} X_{t_2}^{h,j} \sum_{b,d=0}^1 u_{t_2,b}^j u_{t_2,d}^j \right) \\
&= \frac{1}{m_2} \sum_{k,h=1}^m \hat{r}_{t_1}^{k,h,\text{covar}} \hat{r}_{t_2}^{k,h,\text{covar}}. \tag{32}
\end{aligned}$$

A possible drawback of the summary statistics  $\hat{r}_t^{k,h,\text{covar}}$  is their large number. If the linkage disequilibrium (LD) patterns within both studies are approximately the same as in a reference population based on which LD patterns were computed, we can carry out an approximate analysis with only a single summary statistics, as described in Section 5.1.

Finally, the second term on the right hand side of Equation 31 can be easily computed by a research group with access to the genotypes and covariates of overlapping individuals (only covariate can suffice when using the approximation  $G_{t_1, t_2}^{i, j} \approx 1$ ). Otherwise, we describe an approximation of this term in Section 5.2.

## 5.1 Approximate Summary Statistics without LD

Recall from Equation 32 that computation of the sum  $\sum_{i, j} \left( G_{t_1, t_2}^{i, j} Q_{t_1, t_2}^{i, j} \right)^2$  via summary statistics requires summary statistics for every pair of variants. Here we describe an approximation that requires only a single summary statistics,  $E \left[ Q_{t, t}^{i, i} \right]$ , and empirically yields very accurate approximations.

The approximation consists of assuming independence between covariates and genetic variants (technically, one needs to assume only that for every pair of individuals  $i, j$  and pair of variants  $k, h$ , the covariates of individuals  $i, j$  are independent of the product  $X_{t_1}^{k, i} X_{t_1}^{h, i} X_{t_2}^{k, j} X_{t_2}^{h, j}$ , which is a very mild assumption). Using this assumption and the law of large numbers, the denominator of Equation 25 can be approximated as:

$$\begin{aligned}
\sum_{i, j \notin S_{t_1, t_2}} \left( G_{t_1, t_2}^{i, j} Q_{t_1, t_2}^{i, j} \right)^2 &\approx |\{(i, j) \mid (i, j) \notin S_{t_1, t_2}\}| E_{i, j \notin S_{t_1, t_2}} \left[ \left( G_{t_1, t_2}^{i, j} Q_{t_1, t_2}^{i, j} \right)^2 \right] \\
&\approx |\{(i, j) \mid (i, j) \notin S_{t_1, t_2}\}| E_{i, j \notin S_{t_1, t_2}} \left[ \left( G_{t_1, t_2}^{i, j} \right)^2 \right] E_{i, j \notin S_{t_1, t_2}} \left[ \left( Q_{t_1, t_2}^{i, j} \right)^2 \right] \\
&= |\{(i, j) \mid (i, j) \notin S_{t_1, t_2}\}| E_{i, j \notin S_{t_1, t_2}} \left[ \left( G_{t_1, t_2}^{i, j} \right)^2 \right] E_{i, j \notin S_{t_1, t_2}} \left[ \left( \sum_{a, b=0}^1 u_{t_1, a}^i u_{t_2, b}^j \right)^2 \right] \\
&= |\{(i, j) \mid (i, j) \notin S_{t_1, t_2}\}| E_{i, j \notin S_{t_1, t_2}} \left[ \left( G_{t_1, t_2}^{i, j} \right)^2 \right] E_{i, j \notin S_{t_1, t_2}} \left[ \sum_{a, b, c, d=0}^1 u_{t_1, a}^i u_{t_1, c}^i u_{t_2, b}^j u_{t_2, d}^j \right] \\
&= |\{(i, j) \mid (i, j) \notin S_{t_1, t_2}\}| E_{i, j \notin S_{t_1, t_2}} \left[ \left( G_{t_1, t_2}^{i, j} \right)^2 \right] E_{i, j \notin S_{t_1, t_2}} \left[ Q_{t_1}^{i, i} Q_{t_2}^{j, j} \right]. \tag{33}
\end{aligned}$$

To proceed, we first make use of the fact that when the in-sample LD patterns in both studies are the same, we have:

$$E_{i, j \notin S_{t_1, t_2}} \left[ \left( G_{t_1, t_2}^{i, j} \right)^2 \right] = \frac{n_{t_1} n_{t_2}}{m} E[\ell], \tag{34}$$

where  $E[\ell]$  is the unbiased estimate of the mean LD score among all genetic variants in the data (see [5] for an explanation). Second, we use the fact that  $Q_{t_1}^{i, i}$ ,  $Q_{t_2}^{j, j}$  are independent for  $i, j \notin S_{t_1, t_2}$ , as they depend only on the covariates of individuals  $i, j$ , which are sampled from their respective distributions. Using these facts, Equation 33 can be approximated as:

$$\sum_{i, j \notin S_{t_1, t_2}} \left( G_{t_1, t_2}^{i, j} Q_{t_1, t_2}^{i, j} \right)^2 \approx \frac{n_{t_1} n_{t_2}}{m} E[\ell] E \left[ Q_{t_1}^{i, i} \right] E \left[ Q_{t_2}^{j, j} \right]. \tag{35}$$

We conclude that the denominator of the PCGC estimator (Equation 25) can be approximated as  $\frac{n_{t_1} n_{t_2}}{m} E[\ell] E \left[ Q_{t_1}^{i, i} \right] E \left[ Q_{t_2}^{j, j} \right]$ .

Finally, we note that if the covariate-genotypes independence assumption above does not exactly hold, one can obtain a better fit by assuming conditional independence given

phenotypes, and then apply the approximation:

$$\begin{aligned} \sum_{i,j \notin S_{t_1,t_2}} \left(G_{t_1,t_2}^{i,j} Q_{t_1,t_2}^{i,j}\right)^2 &\approx N^{\text{cas,cas}} E \left[ \left(G_{t_1,t_2}^{\text{cas,cas}} Q_{t_1,t_2}^{\text{cas,cas}}\right)^2 \right] + N^{\text{cas,con}} E \left[ \left(G_{t_1,t_2}^{\text{cas,con}} Q_{t_1,t_2}^{\text{cas,con}}\right)^2 \right] \\ &+ N^{\text{con,cas}} E \left[ \left(G_{t_1,t_2}^{\text{con,cas}} Q_{t_1,t_2}^{\text{con,cas}}\right)^2 \right] + N^{\text{con,con}} E \left[ \left(G_{t_1,t_2}^{\text{con,con}} Q_{t_1,t_2}^{\text{con,con}}\right)^2 \right], \end{aligned} \quad (36)$$

where  $N^{\text{cas,cas}}$  is the number of non-overlapping individuals in the two studies who are cases for both traits,  $E \left[ \left(G_{t_1,t_2}^{\text{cas,cas}} Q_{t_1,t_2}^{\text{cas,cas}}\right)^2 \right]$  is the mean value of  $\left(G_{t_1,t_2}^{i,j} Q_{t_1,t_2}^{i,j}\right)^2$  for a pair of cases in the two studies, and the other quantities are defined analogously. One can then apply the approximation for each of the four summands separately. This approximation is typically not required because overlapping individuals consist mainly of shared controls.

## 5.2 Third Party Approximations

If two studies include overlapping individuals, the PCGC estimators cannot be computed exactly by a third party with no access to the covariates of these overlapping individuals. Here we propose a summary statistics based approximation. Recall that the denominator of the PCGC estimator (Equation 25) can be approximated without access to individual-level data using the approximation described in Section 5.1. We are therefore left with the task of approximating the second term in the numerator of Equation 25, given by  $\sum_{i,j \in S_{t_1,t_2}} \tilde{y}_{t_1}^i \tilde{y}_{t_2}^j G_{t_1,t_2}^{i,j} Q_{t_1,t_2}^{i,j}$ .

As a first step, we can approximate  $G^{i,j} \approx 1$  since  $i$  and  $j$  refer to the same individual, which simplifies this term to  $\sum_{i,j \in S_{t_1,t_2}} \tilde{y}_{t_1}^i \tilde{y}_{t_2}^j Q_{t_1,t_2}^{i,j}$ . We propose approximating this term by approximating the expectation for every combination of the two phenotypes:

$$\sum_{i,j \in S_{t_1,t_2}} \tilde{y}_{t_1}^i \tilde{y}_{t_2}^j Q_{t_1,t_2}^{i,j} \approx \sum_{y_{t_1}^i, y_{t_2}^j \in \{0,1\}} n_{t_1,t_2}^{y_{t_1}^i, y_{t_2}^j} E \left[ \tilde{y}_{t_1}^i \tilde{y}_{t_2}^j Q_{t_1,t_2}^{i,j} \mid y_{t_1}^i, y_{t_2}^j \right], \quad (37)$$

where  $n_{t_1,t_2}^{y_{t_1}^i, y_{t_2}^j}$  is the number of overlapping individuals having phenotypes  $y_{t_1}^i$  and  $y_{t_2}^j$ . However, unlike before we cannot make independence assumptions because the terms in the expectations refer to the same individuals, and therefore terms belonging to the two studies are likely to use the same covariates.

Instead, we propose to use summary statistics of the mean covariates vector for every combination of phenotypes,  $E \left[ \mathbf{C}_{t_1}^i; \mathbf{C}_{t_2}^j \mid y_{t_1}^i, y_{t_2}^j \right]$ . Typically this is feasible because overlapping individuals consist almost exclusively of controls. Using this information, we can approximate the term  $E \left[ \tilde{y}_{t_1}^i \tilde{y}_{t_2}^j Q_{t_1,t_2}^{i,j} \mid y_{t_1}^i, y_{t_2}^j \right]$  via a first order Taylor expansion of  $\tilde{y}_{t_1}^i \tilde{y}_{t_2}^j Q_{t_1,t_2}^{i,j}$  around the mean covariate values, respectively. Since the first-order Taylor expansion is linear in the covariates, the approximate expectation is linear in the mean covariates vector. Although the derivations are technically straightforward, they are extremely tedious to write down explicitly. Nevertheless, it is not difficult to code these computations algorithmically.

## 6 Allele-frequency and LD Dependent Genetic Architectures

The derivations in the sections above assume a genetic similarity matrix of the form  $\mathbf{G} = \mathbf{X}\mathbf{X}^T/m$ . It is possible to consider alternative architectures, which assign different weights to different SNPs based on their MAF levels, their LD-scores, or other properties [6]. In this case, the genetic similarity matrix can be written as  $\mathbf{G} = \mathbf{X}\mathbf{W}\mathbf{X}^T/M$ , where  $\mathbf{W}$  is an  $m \times m$  diagonal matrix of SNP weights, and  $M = \sum_k W^{kk}$  is a normalization factor which guarantees that the mean entry in the diagonal of the resulting matrix is 1.0. Assuming that the weights are known, it is straightforward to adapt PCGC and PCGC-s for such architectures, as we now describe.

Adapting PCGC for alternative architectures is straightforward, by using the correct (weighted) form of the genetic similarity entries  $G_{t_1, t_2}^{i, j}$  in Equation 25. To adapt PCGC-s, we need to adapt the summary statistics in Equation 26 by (a) multiplying each summary statistic  $z_t^{k, \text{covar}}$  by  $\sqrt{W^{kk}/M}$ , and (b) multiplying each summary statistic  $\hat{r}_t^{k, h, \text{covar}}$  by  $\sqrt{W^{kk}W^{hh}}/M$ .

Instead of using the summary statistics  $\hat{r}_t^{k, h, \text{covar}}$ , we can approximate the denominator of the modified form of Equation 25 (as described in Section 5.1) by replacing the average LD score  $E[\ell] = \sum_{k, h} (\hat{r}^{kh})^2 / m$  in Equation 35 with the term  $\sum_{k, h} W^{kk}W^{hh} (\hat{r}^{kh})^2 / M$ .

Hence, we can approximate the denominator of the PCGC-s estimator via:

$$n_{t_1} n_{t_2} \frac{1}{M} \sum_{k, h} W^{kk} W^{hh} (\hat{r}^{kh})^2 E [Q_{t_1}^{i, i}] E [Q_{t_2}^{j, j}]. \quad (38)$$

Importantly, the above derivation demonstrates that we can carry out estimation using the exact same summary statistics as in the unweighted version of PCGC-s. Hence, it is possible to evaluate heritability and genetic correlation under various sets of modeling assumptions given a single set of summary statistics.

## 7 Extension to Multiple Variance Components

The derivations in the sections above describe estimation of a single variance component. The extension to multiple variance components is straightforward [3]. In the presence of multiple variance components, the PCGC estimator is obtained via a multivariate Taylor expansion of the form:

$$\begin{aligned} & E \left[ \tilde{y}_{t_1}^i \tilde{y}_{t_2}^j \mid \mathbf{C}_{t_1}^i, \mathbf{C}_{t_2}^j, s_{t_1}^i, s_{t_2}^j, G_{t_1, t_2}^{i, j} \right] \\ &= \sum_{v=1}^V G_{t_1, t_2; v}^{i, j} Q_{t_1, t_2}^{i, j} \rho_{t_1, t_2; v} + \sum_{v=1}^V \mathcal{O} \left( \left( G_{t_1, t_2; v}^{i, j} \right)^2 \right), \end{aligned} \quad (39)$$

where  $V$  is the number of variance components,  $G_{t_1, t_2; v}^{i, j}$  is the genetic similarity coefficient between individuals  $i$  and  $j$  according to variance component  $v$  and  $\rho_{t_1, t_2; v}$  is the corresponding coefficient. The multivariate regression estimator is now given by:

$$\hat{\boldsymbol{\rho}}_{t_1, t_2}^{\text{pcgc-multi}} \triangleq \left( (\mathbf{Z}_{t_1, t_2})^T \mathbf{Z}_{t_1, t_2} \right)^{-1} (\mathbf{Z}_{t_1, t_2})^T \tilde{\mathbf{Y}}_{t_1, t_2}. \quad (40)$$

In Equation 40,  $\tilde{\mathbf{Y}}_{t_1, t_2}$  is a  $(n_{t_1} n_{t_2} - |S_{t_1, t_2}|) \times 1$  vector of  $\tilde{y}_{t_1}^i \tilde{y}_{t_2}^j$  values for non-overlapping individuals and  $\mathbf{Z}_{t_1, t_2}$  is a  $(n_{t_1} n_{t_2} - |S_{t_1, t_2}|) \times V$  matrix where column  $v$  is a vector of  $G_{t_1, t_2; v}^{i, j} Q_{t_1, t_2}^{i, j}$  values for non-overlapping individuals.

We now describe how Equation 40 can be computed via summary statistics. We consider the terms  $\left( (\mathbf{Z}_{t_1, t_2})^T \mathbf{Z}_{t_1, t_2} \right)^{-1}$  and  $(\mathbf{Z}_{t_1, t_2})^T \tilde{\mathbf{Y}}_{t_1, t_2}$  separately.

We begin with the term  $(\mathbf{Z}_{t_1, t_2})^T \tilde{\mathbf{Y}}_{t_1, t_2}$ . This term is a vector with  $V$  elements, each of which corresponds to the summation  $\sum_{i, j \notin S_{t_1, t_2}} G_{t_1, t_2; v}^{i, j} Q_{t_1, t_2}^{i, j} \tilde{y}_{t_1}^i \tilde{y}_{t_2}^j$ . Following the derivation in Equations 28 and 29, each such term can be computed via:

$$\sum_{i, j \notin S_{t_1, t_2}} G_{t_1, t_2; v}^{i, j} Q_{t_1, t_2}^{i, j} \tilde{y}_{t_1}^i \tilde{y}_{t_2}^j = \frac{1}{m^v} \sum_{k \in v} z_{t_1}^{k, \text{covar}} z_{t_2}^{k, \text{covar}} - \sum_{i, j \in S_{t_1, t_2}} G_{t_1, t_2; v}^{i, j} Q_{t_1, t_2}^{i, j} \tilde{y}_{t_1}^i \tilde{y}_{t_2}^j, \quad (41)$$

where  $m^v$  is the number of variants used to compute genetic similarity coefficient  $v$  and  $k$  iterates over all variants participating in this genetic similarity coefficient. As before, the second term on the right hand side can be computed by a party with access to the covariates of overlapping individuals, using the summary statistics  $w_t^i$  in Equation 27 or using the approximations described in Section 5.2.

The term  $\left( (\mathbf{Z}_{t_1, t_2})^T \mathbf{Z}_{t_1, t_2} \right)$  is a  $V \times V$  matrix, wherein each entry  $\left( (\mathbf{Z}_{t_1, t_2})^T \mathbf{Z}_{t_1, t_2} \right)^{v, w}$  corresponds to the summation  $\sum_{i, j \notin S_{t_1, t_2}} G_{t_1, t_2; v}^{i, j} G_{t_1, t_2; w}^{i, j} \left( Q_{t_1, t_2}^{i, j} \right)^2$ . Following the derivation in Equations 31 and 32, this term can be computed via summary statistics as follows:

$$\sum_{i, j \notin S_{t_1, t_2}} G_{t_1, t_2; v} G_{t_1, t_2; w} \left( Q_{t_1, t_2}^{i, j} \right)^2 = \frac{1}{m^v m^w} \sum_{k \in v, h \in w} \hat{r}_{t_1}^{k, h, \text{covar}} \hat{r}_{t_2}^{k, h, \text{covar}} - \sum_{i, j \in S_{t_1, t_2}} G_{t_1, t_2; v} G_{t_1, t_2; w} \left( Q_{t_1, t_2}^{i, j} \right)^2. \quad (42)$$

The second term on the right hand side can be computed by a party with access to the covariates of overlapping individuals, or using approximations similar to those described in Section 5.1.

## 8 Estimating the Liability Variance Due to Covariates

Heritability estimation requires dividing the genetic variance estimator of study  $t$ ,  $(\hat{\sigma}_g^2)_t$ , by an estimate of the liability variance  $\text{var}(a_t^i) = 1 + \text{var}\left( (\mathbf{C}_t^i)^T \boldsymbol{\beta}_t \right)$ . However, since the data we have is ascertained, we cannot directly estimate  $\boldsymbol{\beta}$ . Instead we use the non-parametric variance estimator proposed in [3]. Namely, we employ the law of total variance to decompose  $\text{var}(a_t^i)$  as follows:

$$\text{var}(a_t^i) = E \left[ \text{var} \left( a_t^i \mid (\mathbf{C}_t^i)^T \boldsymbol{\beta}_t \right) \right] + \text{var} \left( E \left[ a_t^i \mid (\mathbf{C}_t^i)^T \boldsymbol{\beta}_t \right] \right). \quad (43)$$

The first term on the right hand side of Equation 43 is equal to one by definition, so our task is estimating the second term, which is equal to  $\text{var}\left( (\mathbf{C}_t^i)^T \boldsymbol{\beta}_t \right)$  by definition. Since  $\tau_{t_i} \triangleq \tau_t + (\mathbf{C}_t^i)^T \boldsymbol{\beta}_t$ , we can instead estimate  $\text{var}(\tau_{t_i})$ . We employ the law of total variance again to obtain:

$$\text{var}(\tau_{t_i}) = E \left[ \text{var} \left( \tau_{t_i} \mid y^i \right) \right] + \text{var} \left( E \left[ \tau_{t_i} \mid y^i \right] \right). \quad (44)$$

Following the derivation in [3] we can estimate the right hand side of Equation 44 as follows:

$$\begin{aligned} E \left[ \text{var} \left( \tau_{t_i} \mid y_t^i \right) \right] &= K_t \text{var}(\tau_t^i \mid y_t^i = 1) + (1 - K_t) \text{var}(\tau_t^i \mid y_t^i = 0). \\ \text{var} \left( E \left[ \tau_{t_i} \mid y_t^i \right] \right) &= K_t(1 - K_t) \left( E \left[ \tau_t^i \mid y_t^i = 1 \right] - E \left[ \tau_t^i \mid y_t^i = 0 \right] \right)^2. \end{aligned} \quad (45)$$

The affection cutoffs  $\tau_{t_i}$  are conditionally independent of the selection variables  $s_t^i$  given the phenotypes  $y_t^i$ . We can therefore estimate the expectations and variances in Equation 45 by their sample estimates.

Consequently, heritability estimation via summary statistics (without having access to genotype or phenotype data) requires the summary statistic  $\text{var}(\tau_{t_i})$ .

## 9 Logistic Regression based Summary Statistics

Case control studies often report logistic regression rather than linear regression based Z-scores. We demonstrate here that although the PCGC estimator should ideally be computed with linear regression Z-scores, logistic regression Z-scores are approximately the same as linear regression Z-scores under large sample sizes. Thus, the use of logistic regression based summary statistics is expected to yield accurate estimates as well, as verified in our simulations. Our derivation here assumes that variants are single nucleotide polymorphisms (SNPs) and does not consider covariates. The use of logistic regression based summary statistics with covariates leads to inaccurate estimates, as demonstrated in the main text. We note that a somewhat similar treatment was provided in [7], but this treatment only concerned the estimated effect sizes, whereas here we are concerned with the Z-scores of the estimates.

Recall that linear regression Z-scores are given by:

$$Z_t^{k,\text{linear}} \triangleq \frac{1}{\sqrt{n_t}} \sum_i \tilde{y}_t^i X_t^{k,i}. \quad (46)$$

Logistic regression Z-scores are given by:

$$Z_t^{k,\text{logistic}} \triangleq \frac{\hat{\beta}^k}{\sqrt{\text{Var}(\hat{\beta}^k)}}, \quad (47)$$

where  $\hat{\beta}^k$  is the estimate of the logistic regression coefficient of SNP  $k$ . We show that under several mild assumptions  $Z_t^{k,\text{logistic}} \approx Z_t^{k,\text{linear}}$  under large sample sizes.

Our derivation is carried out in two stages. First, we apply a Taylor expansion to show that  $\hat{\beta}^k \approx \frac{Z_t^{k,\text{linear}}}{\sqrt{n_t P_t (1 - P_t)}}$ , where  $P_t$  is the case-control proportion in study  $t$ . Then, we approximate  $Z_t^{k,\text{logistic}}$  via a Taylor expansion around  $\hat{\beta}^k = 0$  and incorporate the estimate of  $\hat{\beta}^k$  from the first stage to complete the derivation.

**First stage:** We now demonstrate that  $\hat{\beta}^k \approx \frac{Z_t^{k,\text{linear}}}{\sqrt{n_t P_t (1 - P_t)}}$  under large sample sizes.

We consider a logistic regression model with the covariates vector  $\mathbf{X}_t^k$  and an intercept. Unfortunately, logistic regression does not admit a closed form solution. To circumvent this difficulty, we will approximate the solution by using a profile log likelihood instead



of the true log likelihood. Namely, we will first find the maximum likelihood estimate (MLE) of the intercept coefficient  $\beta_0^k$  under the assumption  $\beta^k = 0$  and then express the MLE of  $\beta^k$  as a function of  $\hat{\beta}_0^k$  and of  $Z_t^{k,\text{linear}}$ . This approximation is likely to be accurate if  $\beta^k \approx 0$ , which is likely to hold for polygenic traits.

Finding the MLE of  $\beta_0^k$  under the assumption  $\beta^k = 0$  is easy. The log likelihood is:

$$\ell(\beta_0^k) = -n_t P_t \log(1 + \exp(-\beta_0^k)) - n_t(1 - P_t) \log(1 + \exp(\beta_0^k)), \quad (48)$$

and after differentiating it and setting the derivative to zero, we obtain:

$$\hat{\beta}_0^k = \log(P_t/(1 - P_t)). \quad (49)$$

To proceed we assume that under large sample sizes, logistic regression and linear regression estimate the same conditional mean function. The approximation is accurate when the first order approximation of the logistic function as a function of  $X$  is close to the actual function, which is the case when  $\beta^k \approx 0$  (more generally, the approximation holds when both the logistic and linear approximation of the true function estimate a very small coefficient for the tested variant). Formally, denote  $E_{\text{linear}}[\tilde{y}_{t_i} | X_t^{k,i}]$  as the linear regression estimated conditional mean of  $\tilde{y}_{t_i}$  given  $X_t^{k,i}$ , and  $E_{\text{logistic}}[y_{t_i} | X_t^{k,i}]$  as the logistic regression estimated conditional mean of  $y_{t_i}$  given  $X_t^{k,i}$ . Then we assume that for every value of  $X_t^{k,i}$ :

$$\begin{aligned} E_{\text{linear}}[\tilde{y}_{t_i}^i | X_t^{k,i}] &= E_{\text{linear}} \left[ \frac{y_{t_i}^i - P_t}{\sqrt{P_t(1 - P_t)}} \middle| X_t^{k,i} \right] \\ &= \frac{E_{\text{linear}}[y_{t_i}^i | X_t^{k,i}] - P_t}{\sqrt{P_t(1 - P_t)}} \\ &\approx \frac{E_{\text{logistic}}[y_{t_i}^i | X_t^{k,i}] - P_t}{\sqrt{P_t(1 - P_t)}}. \end{aligned} \quad (50)$$

This assumption enables us to express  $\hat{\beta}^k$  as a function of  $Z_t^{k,\text{linear}}$ .

We begin by simplifying the logistic regression estimate. According to the definition of logistic regression, we have:

$$E_{\text{logistic}}[y_{t_i}^i | X_t^{k,i}] = P(y_{t_i}^i = 1 | X_t^{k,i}) = \frac{1}{1 + \exp(-X_t^{k,i} \hat{\beta}^k - \hat{\beta}_0^k)}. \quad (51)$$

We approximate this quantity via a Taylor expansion around  $\hat{\beta}^k = 0$  and then plug in the approximated value of  $\hat{\beta}_0^k$  from Equation 49 to obtain:

$$\begin{aligned} E_{\text{logistic}}[y_{t_i}^i | X_t^{k,i}] &\approx \frac{1}{1 + \exp(-\beta_0^k)} + \frac{X_t^{k,i} \exp(-\beta_0^k)}{(1 + \exp(-\beta_0^k))^2} \hat{\beta}^k \\ &\approx \frac{1}{1 + (1 - P_t)/P_t} + \frac{X_t^{k,i} (1 - P_t)/P_t}{(1 + (1 - P_t)/P_t)^2} \hat{\beta}^k \\ &= P_t + P_t(1 - P_t) X_t^{k,i} \hat{\beta}^k. \end{aligned} \quad (52)$$

We now consider a linear regression model. Denoting  $\hat{\gamma}^k$  as the coefficient estimate of  $X_t^{k,i}$  in the regression of  $\tilde{y}_{t_i}^i$  on  $X_t^{k,i}$ , we have:

$$\hat{\gamma}^k = \sqrt{n_t} \frac{Z_t^{k,\text{linear}}}{\sum_i (X_t^{k,i})^2} \approx \frac{Z_t^{k,\text{linear}}}{\sqrt{n_t}}, \quad (53)$$

where we made the approximation  $\sum_i (X_t^{k,i})^2 \approx n_t$ . Although this is not guaranteed to hold in case-control studies where the allele frequencies are different from the population frequencies, the approximation remains accurate under high levels of polygenicity where each SNP exerts a very small effect on the phenotype. Therefore, the linear regression estimate of the conditional mean is closely approximated as follows:

$$E_{\text{linear}}[\tilde{y}_t^i | X_t^{k,i}] = X_t^{k,i} \hat{\gamma}^k \approx X_t^{k,i} \frac{Z_t^{k,\text{linear}}}{\sqrt{n_t}}. \quad (54)$$

Finally, we combine Equations 52 and 54 into Equation 50 and rearrange to obtain:

$$\hat{\beta}^k \approx \frac{Z_t^{k,\text{linear}}}{\sqrt{n_t P_t (1 - P_t)}}. \quad (55)$$

This completes the derivation.

**Second stage:** In the second stage we demonstrate that  $Z_t^{k,\text{logistic}} \approx Z_t^{k,\text{linear}}$  by approximating  $Z_t^{k,\text{logistic}}$  via a Taylor expansion around  $\hat{\beta}^k = 0$ . We begin by deriving  $\text{Var}(\hat{\beta}^k)$ . Define  $\tilde{\mathbf{X}}_t^k$  as a matrix with two columns, where the first column contains ones and the second column contains  $\mathbf{X}_t^k$ . The observed information matrix is given by  $(\tilde{\mathbf{X}}_t^k)^T \mathbf{D} \tilde{\mathbf{X}}_t^k$ , where  $\mathbf{D}$  is given by:

$$\mathbf{D} = \text{diag} \left( \left( 1 + \exp \left( -X_t^{k,i} \hat{\beta}^k - \hat{\beta}_0^k \right)^{-1} \right) \left( 1 + \exp \left( X_t^{k,i} \hat{\beta}^k + \hat{\beta}_0^k \right)^{-1} \right) \right). \quad (56)$$

The covariance matrix  $\left( (\tilde{\mathbf{X}}_t^k)^T \mathbf{D} \tilde{\mathbf{X}}_t^k \right)^{-1}$  can be computed analytically using the formula for inversion of a  $2 \times 2$  matrix. Namely,  $\text{Var}(\hat{\beta}^k)$  is given by:

$$\text{Var}(\hat{\beta}^k) = \frac{\sum_i D^{i,i}}{\left( \sum_i D^{i,i} \right) \left( \sum_i D^{i,i} (X_t^{k,i})^2 \right) - \left( \sum_i D^{i,i} X_t^{k,i} \right)^2}. \quad (57)$$

To write  $\text{Var}(\hat{\beta}^k)$  in an analytic form, denote  $n_t^0$ ,  $n_t^1$  and  $n_t^2$  as the number of individuals with 0, 1 and 2 minor alleles in SNP  $k$ , respectively. Further denote  $D^0$ ,  $D^1$  and  $D^2$  as the values of the diagonal entries of  $\mathbf{D}$  corresponding to individuals with 0, 1 and 2 minor alleles, respectively (note that the  $i$ th diagonal entry in  $\mathbf{D}$  depends only on the number of minor alleles carried by individual  $i$ ). Finally, denote  $X_{t,0}^k$ ,  $X_{t,1}^k$  and  $X_{t,2}^k$  as the values of the genotypes carried by individuals with 0, 1 and 2 minor alleles, respectively, after normalization. Using these notations, we can rewrite Equation 57 as follows:

$$\text{Var}(\hat{\beta}^k) = \frac{\sum_{a=0}^2 n_t^a D^a}{\left( \sum_{a=0}^2 n_t^a D^a \right) \left( \sum_{a=0}^2 n_t^a D^a (X_{t,a}^k)^2 \right) - \left( \sum_{a=0}^2 n_t^a D^a X_{t,a}^k \right)^2}. \quad (58)$$

We can now incorporate Equation 58 into Equation 47 and then compute a first order Taylor expansion of  $Z_t^{k,\text{logistic}}$  around  $\hat{\beta}^k = 0$ . After also using the approximation of  $\hat{\beta}_0^k$  from Equation 49 and applying some algebra, the first order Taylor approximation takes the form:

$$\begin{aligned} Z_t^{k,\text{logistic}} &\approx \frac{P_t \sqrt{\left( \sum_{a,b=0,a \neq b}^2 n_t^a n_t^b (X_{t,a}^k)^2 \right) - 2 \left( \sum_{a,b=0,a < b}^2 n_t^a n_t^b X_{t,a}^k X_{t,b}^k \right)}}{\sqrt{n_t P_t / (1 - P_t)}} \hat{\beta}^k. \\ &= \frac{P_t \sqrt{\sum_{a,b=0,a < b}^2 n_t^a n_t^b (X_{t,a}^k - X_{t,b}^k)^2}}{\sqrt{n_t P_t / (1 - P_t)}} \hat{\beta}^k. \end{aligned} \quad (59)$$

Next, we use the fact that the genotypes were initially coded as 0,1,2 and then standardized by subtracting twice the minor allele frequency  $p^k$  and dividing by  $\sqrt{2p^k(1-p^k)}$ . We therefore have:

$$\frac{1}{\sqrt{2p^k(1-p^k)}} = X_{t,2}^k - X_{t,1}^k = X_{t,1}^k - X_{t,0}^k = \frac{X_{t,2}^k - X_{t,0}^k}{2}. \quad (60)$$

Using this fact, Equation 59 can be rewritten as:

$$Z_t^{k,\text{logistic}} \approx \frac{P_t \sqrt{n_t^0 n_t^1 + n_t^1 n_t^2 + 4n_t^0 n_t^2}}{\sqrt{n_t P_t / (1 - P_t)} \sqrt{2p^k(1-p^k)}} \hat{\beta}^k. \quad (61)$$

To proceed, we note that under large sample sizes and assuming Hardy-Weinberg equilibrium (HWE), we have  $n_t^0 \approx n_t(1-p^k)^2$ ,  $n_t^1 \approx 2n_t p^k(1-p^k)$ ,  $n_t^2 \approx n_t(p^k)^2$ . In practice, HWE and these approximations do not hold exactly in case-control studies, but the deviation is very small for highly polygenic traits where each SNP has a small effect. By incorporating these approximations into Equation 61, we obtain:

$$\begin{aligned} Z_t^{k,\text{logistic}} &\approx \frac{P_t n_t \sqrt{2p^k(1-p^k)^3 + 2(p^k)^3(1-p^k) + 4(p^k)^2(1-p^k)^2}}{\sqrt{n_t P_t / (1 - P_t)} \sqrt{2p^k(1-p^k)}} \hat{\beta}^k. \\ &= \frac{P_t n_t \sqrt{(1-p^k)^2 + (p^k)^2 + 2p^k(1-p^k)}}{\sqrt{n_t P_t / (1 - P_t)}} \hat{\beta}^k \\ &= \sqrt{n_t P_t (1 - P_t)} \hat{\beta}^k. \end{aligned} \quad (62)$$

Finally, we combine Equations 55 and 62 to obtain:

$$Z_t^{k,\text{logistic}} \approx \sqrt{n_t P_t (1 - P_t)} \frac{Z_t^{k,\text{linear}}}{\sqrt{n_t P_t (1 - P_t)}} = Z_t^{k,\text{linear}}. \quad (63)$$

This completes the derivation.

## 10 Additional Summary Statistics

In [2] it is proposed to use LD score regression in case control studies by treating each SNP as a pair of binary variables, which enables using summary statistics of the form:

$$Z_{t,m}^{k,\text{binary}} \triangleq \frac{\sqrt{n_t P_t (1 - P_t)} (\hat{p}_{t,m}^{k,\text{cas}} - \hat{p}_{t,m}^{k,\text{con}})}{\sqrt{\hat{p}_{t,m}^k (1 - \hat{p}_{t,m}^k)}}, \quad (64)$$

where  $Z_{t,m}^{k,\text{binary}}$  is the summary statistics of the maternal allele of SNP  $k$  in study  $t$ ,  $\hat{p}_{t,m}^k$  is the in-sample maternal allele frequency of SNP  $k$  in study  $t$ , and  $\hat{p}_{t,m}^{k,\text{cas}}$ ,  $\hat{p}_{t,m}^{k,\text{con}}$  are its in-sample maternal allele frequency among cases and controls, respectively. The paternal allele summary statistic  $Z_{t,p}^{k,\text{binary}}$  is defined analogously. [2] argue that using LD score regression with these summary statistics and a constrained intercept yields approximately the correct genetic correlation estimate. Here we reach the same conclusion, by showing that these summary statistics are approximately proportional to linear

regression-based summary statistics of maternal and paternal alleles, which can provably be used to estimate genetic correlation owing to the relation to PCGC discussed in the main text.

We begin by establishing some notations. Denote  $X_{t,m}^{k,i}$ ,  $X_{t,p}^{k,i}$  as the maternal and paternal alleles of SNP  $k$  of individual  $i$  in study  $t$ , respectively, where  $X_{t,m}^{k,i}, X_{t,p}^{k,i} \in \{0, 1\}$ . Further denote  $X_t^{k,i} = X_{t,m}^{k,i} + X_{t,p}^{k,i}$  as the un-standardized value of SNP  $k$  of individual  $i$  in study  $t$ , and denote  $\tilde{X}_{t,m}^{k,i} = \frac{X_{t,m}^{k,i} - p^k}{\sqrt{2p^k(1-p^k)}}$  as the standardized value of the maternal allele, and denote  $\tilde{X}_{t,p}^{k,i} = \frac{X_{t,p}^{k,i} - p^k}{\sqrt{2p^k(1-p^k)}}$  analogously for the paternal allele, where  $p^k$  is the minor allele frequency of SNP  $k$ . Note that the notations here are slightly different from those used in the rest of the paper and the Supplemental material, where we defined  $X_t^{k,i}$  as the standardized value of SNP  $k$ . This modification facilitates the notations in this section.

Using these notations, we define the maternal, paternal and standard linear regression summary statistics of the form:

$$\begin{aligned} Z_{t,m}^{k,\text{linear}} &\triangleq \frac{1}{\sqrt{n_t}} \sum_i \tilde{X}_{t,m}^{k,i} \tilde{y}_t^i \\ Z_{t,p}^{k,\text{linear}} &\triangleq \frac{1}{\sqrt{n_t}} \sum_i \tilde{X}_{t,p}^{k,i} \tilde{y}_t^i \\ Z_t^{k,\text{linear}} &\triangleq \frac{1}{\sqrt{n_t}} \sum_i \left( \tilde{X}_{t,m}^{k,i} + \tilde{X}_{t,p}^{k,i} \right) \tilde{y}_t^i. \end{aligned} \quad (65)$$

In the large sample limit we have:

$$\sum_k Z_{t_1,m}^{k,\text{linear}} Z_{t_2,m}^{k,\text{linear}} + \sum_k Z_{t_1,p}^{k,\text{linear}} Z_{t_2,p}^{k,\text{linear}} \approx \frac{1}{2} \sum_k Z_{t_1}^{k,\text{linear}} Z_{t_2}^{k,\text{linear}}. \quad (66)$$

The approximation is obtained by applying the approximation that for each  $r \in \{m, p\}$  the sum  $\sum_k Z_{t_1,r}^{k,\text{linear}} Z_{t_2,r}^{k,\text{linear}}$  is the same in the large sample limit. This sum is used in the numerator of the PCGC-s covariance estimator described in the main text. We conclude that the sum of the maternal and paternal linear regression-based summary statistics can be used to estimate genetic correlation, since genetic correlation is a ratio and is therefore invariant to scaling by  $\frac{1}{2}$ .

We now show that in the large sample limit we have:

$$\begin{aligned} Z_{t,m}^{k,\text{binary}} &\approx 2\sqrt{2}P_t(1-P_t)Z_{t,m}^{k,\text{linear}} + \frac{\sqrt{n_t p^k P_t (1-P_t)}}{\sqrt{(1-p^k)}} (2P_t - 1) \\ Z_{t,p}^{k,\text{binary}} &\approx 2\sqrt{2}P_t(1-P_t)Z_{t,p}^{k,\text{linear}} + \frac{\sqrt{n_t p^k P_t (1-P_t)}}{\sqrt{(1-p^k)}} (2P_t - 1). \end{aligned} \quad (67)$$

These approximations demonstrate that  $Z_{t,m}^{k,\text{binary}}$  is approximately proportional to  $Z_{t,m}^{k,\text{linear}}$  when the case-control ratio  $P_t$  is close to  $\frac{1}{2}$ , and can therefore be used to estimate genetic correlation as well. All the derivations henceforth refer to the maternal allele but are equally applicable to the paternal allele.

We first rewrite Equation 65 as follows:

$$\begin{aligned}
Z_{t,m}^{k,\text{linear}} &= \frac{1}{\sqrt{n_t}} \sum_i \tilde{y}_{t_i} \frac{X_{t,m}^{k,i} - p^k}{\sqrt{2p^k(1-p^k)}} \\
&= \frac{1}{\sqrt{n_t}} \sum_i \tilde{y}_{t_i} \frac{X_{t,m}^{k,i}}{\sqrt{2p^k(1-p^k)}} \\
&= \frac{1}{\sqrt{n_t}} \sum_i \frac{y_{t_i}^i - P_t}{\sqrt{P_t(1-P_t)}} \frac{X_{t,m}^{k,i}}{\sqrt{2p^k(1-p^k)}} \\
&= \frac{\sum_i y_{t_i}^i X_{t,m}^{k,i} - P_t \sum_i X_{t,m}^{k,i}}{\sqrt{2n_t P_t(1-P_t) p^k(1-p^k)}} \\
&\approx \frac{\sum_i y_{t_i}^i X_{t,m}^{k,i} - n_t P_t p^k}{\sqrt{2n_t P_t(1-P_t) p^k(1-p^k)}}. \tag{68}
\end{aligned}$$

Here, the first equality uses the definition of  $\tilde{X}_t^{k,i}$  as a standardized SNP, the second equality uses the fact that  $\sum_i \tilde{y}_{t_i} = 0$  by definition, the third equality uses the definition of  $\tilde{y}_{t_i}$ , the fourth equality is a straightforward expansion and the final approximation uses a large sample approximation.

Next, we rewrite Equation 64 as follows:

$$\begin{aligned}
Z_{t,m}^{k,\text{binary}} &\triangleq \frac{\sqrt{n_t P_t(1-P_t)} (\hat{p}_{t,m}^{k,\text{cas}} - \hat{p}_{t,m}^{k,\text{con}})}{\sqrt{\hat{p}_{t,m}^k (1 - \hat{p}_{t,m}^k)}} \\
&\approx \frac{\sqrt{n_t P_t(1-P_t)} \sum_i X_{t,m}^{k,i} y^i - \sum_i X_{t,m}^{k,i} (1 - y^i)}{\sqrt{p^k (1 - p^k)} n_t} \\
&= \frac{\sqrt{P_t(1-P_t)}}{\sqrt{n_t p^k (1 - p^k)}} \left( 2 \sum_i X_{t,m}^{k,i} y^i - \sum_i X_{t,m}^{k,i} \right) \\
&\approx \frac{\sqrt{P_t(1-P_t)}}{\sqrt{n_t p^k (1 - p^k)}} \left( 2 \sum_i X_{t,m}^{k,i} y^i - n_t p^k \right). \tag{69}
\end{aligned}$$

Here, both approximations are based on large sample assumptions and the assumption that the in-sample maternal allele frequency  $\hat{p}_{t,m}^k$  is approximately the same as the population-level allele frequency  $p^k$  for highly polygenic traits.

Finally, we combine Equations 68 and 69 to obtain:

$$\begin{aligned}
Z_{t,m}^{k,\text{binary}} &\approx \frac{\sqrt{P_t(1-P_t)}}{\sqrt{n_t p^k (1 - p^k)}} \left( 2 \left( Z_{t,m}^{k,\text{linear}} \sqrt{2n_t P_t(1-P_t) p^k(1-p^k)} + n_t P_t p^k \right) - n_t p^k \right) \\
&= 2\sqrt{2} P_t(1-P_t) Z_{t,m}^{k,\text{linear}} + \frac{\sqrt{n_t p^k P_t(1-P_t)}}{\sqrt{(1-p^k)}} (2P_t - 1). \tag{70}
\end{aligned}$$

We conclude that  $Z_{t,m}^{k,\text{binary}}$  is approximately proportional to  $Z_{t,m}^{k,\text{linear}}$  if the sample case-control ratio  $P_t$  is close to 0.5. Therefore, genetic correlation estimates are likely to be accurate when using the summary statistics  $Z_{t,m}^{k,\text{binary}}$ ,  $Z_{t,p}^{k,\text{binary}}$ .

## 11 The Effect of Ignoring Covariates

Here we prove the result reported in the main text, that under certain conditions, omitting measured covariates does not bias heritability or genetic correlation estimates. Specifically, the estimates remain unbiased if the covariate effects are normally distributed and are uncorrelated with the genetic effect.

The proof proceeds as follows. Recall that the liability for individual  $i$  in study  $t$  is given by  $a_t^i = g_t^i + e_t^i + (\mathbf{C}_t^i)^T \boldsymbol{\beta}_t$ , where  $\mathbf{C}_t^i$  is a vector of covariates and  $\text{var}(g_t^i) + \text{var}(e_t^i) = 1$ . If we treat the term  $(\mathbf{C}_t^i)^T \boldsymbol{\beta}_t$  as an unobserved random variable and assume it is uncorrelated with the genetic effect, then the liability variance is given by  $\text{var}(g_{t_i}) + \text{var}(e_{t_i}^\dagger)$ , where  $e_{t_i}^\dagger = e_t^i + (\mathbf{C}_t^i)^T \boldsymbol{\beta}_t$ . If we additionally assume that  $e_{t_i}^\dagger$  is normally distributed, then all the model assumptions hold except for the constraint  $\text{var}(g_t^i) + \text{var}(e_{t_i}^\dagger) = 1$  (the variables  $e_{t_i}^\dagger$  are by definition independently and identically distributed).

Since the liability is unobserved, it is unidentifiable up to multiplication. We can therefore define a new model in which covariates are omitted, and estimate the model parameters in this new model. Denote  $g_t^{i*}$  and  $e_{t_i}^{*}$  as the genetic and environmental effects in this new model, respectively. We proceed by making the assumption  $\text{var}(g_t^{i*}) + \text{var}(e_{t_i}^{*}) = 1$ . Define  $\sigma_{g_t}^{2*} = \text{var}(g_t^{i*})$ ,  $\sigma_{e_t}^{2*} = \text{var}(e_{t_i}^{*})$ ,  $\rho_{t_1, t_2}^* = \text{cov}(g_{t_1}^{i*}, g_{t_2}^{i*})$  as the genetic variance, the environmental variance and the genetic covariance in this new model, respectively. Then we have:

$$\begin{aligned}\sigma_{g_t}^{2*} &= \frac{\text{var}(g_t^i)}{\text{var}(g_t^i) + \text{var}(e_{t_i}^\dagger)} \\ \sigma_{e_t}^{2*} &= \frac{\text{var}(e_{t_i}^\dagger)}{\text{var}(g_t^i) + \text{var}(e_{t_i}^\dagger)} \\ \rho_{t_1, t_2}^* &= \frac{\rho_{t_1, t_2}}{\sqrt{\text{var}(g_{t_1}^i) + \text{var}(e_{t_1}^\dagger)} \sqrt{\text{var}(g_{t_2}^i) + \text{var}(e_{t_2}^\dagger)}}.\end{aligned}\quad (71)$$

Consequently, heritability and genetic correlation in this new model are given by:

$$\begin{aligned}h_t^{2*} &\triangleq \frac{\sigma_{g_t}^{2*}}{1} = \frac{\text{var}(g_t^i)}{\text{var}(g_t^i) + \text{var}(e_{t_i}^\dagger)} = \frac{\text{var}(g_t^i)}{\text{var}(a_t^i)} = h_t^2 \\ r_{t_1, t_2}^{g*} &\triangleq \frac{\rho_{t_1, t_2}^*}{\sqrt{\sigma_{g_{t_1}}^{2*} \sigma_{g_{t_2}}^{2*}}} = \frac{\rho_{t_1, t_2}}{\sqrt{\text{var}(g_{t_1}^i) \text{var}(g_{t_2}^i)}} = r_{t_1, t_2}^g.\end{aligned}\quad (72)$$

We conclude that when the assumptions of covariate normality and lack of correlation with genetic effects hold, heritability and genetic correlation in the omitted-covariates model is the same as in the covariates model. Therefore, estimates of these quantities are unbiased when these assumptions hold.

## 12 Real Data Analysis

We performed stringent quality control preprocessing to avoid genotyping artifacts from biasing the results. SNPs were excluded if they had minor allele frequency  $< 5\%$ ,

missingness rates  $> 1\%$ , a significantly different missingness rate between cases and controls, or a significant deviation from Hardy Weinberg equilibrium among the controls group. In the Wellcome Trust Case Control Consortium (WTCCC) analysis, controls consisted of individuals from the national blood service control group. Individuals were excluded from the analysis if they were in the WTCCC exclusion lists or if they had missingness rates  $> 1\%$ . We further excluded individuals with a standardized similarity coefficient  $> 0.05$  with at least one other individual, by greedily removing individuals according to the number of related individuals they had, until no related individuals remained. In Table 1 and in Supplemental Tables S3 and S5 we additionally projected all genotype vectors to the subspace that is orthogonal to the top 10 principal components to prevent spurious results due to population structure. However, we caution that the analysis is sensitive to this procedure (see next section).

The analysis of each pair of WTCCC traits included approximately 1,950 cases, 1,450 shared controls and 275,000 SNPs that passed the quality filtering in both data sets. Following [1], the assumed prevalence for the traits was Crohn’s disease (CD, 0.1%), type 1 diabetes (T1D; 0.5%), bipolar disorder (BD, 0.5%), rheumatoid arthritis (RA; 0.75%), type 2 diabetes (T2D; 3%), coronary artery disease (CAD; 3.5%) and hypertension (HT; 5%).

The schizophrenia data set included 1745 cases and 2586 controls. The bipolar disorder data set included 1268 cases and 3707 controls. 2566 controls were shared between the two data sets. After quality control, the analysis included 635,339 SNPs shared between the two data sets. These SNPs were taken from genotyped and imputed data provided by the Psychiatric Genomics Consortium (PGC), and filtered to ensure that no two SNPs had  $r_2 > 0.9$ . The MHC region was excluded from all analyses of these disorders. The assumed population prevalence for both disorders was 1%.

When analyzing the PGC datasets according to the LDAK model assumptions [6], we first computed SNP LD-weightings using LDAK [6], and then multiplied the LD-weighting of SNP  $j$  by  $(p^j(1-p^j))^{0.75}$  (where  $p_j$  is the MAF of SNP  $j$ ) to obtain its final weight. We then used these weights to compute a weighted genetic similarity coefficient between every pair of individuals. These weighted genetic similarity coefficients were used in the PCGC-s estimator, as explained in Section 6. LDAK estimated the weight of 244,640 SNPs as zero, which decreased the number of SNPs used in the estimation to 390,699. The LDAK commands we used to compute weightings were:

```
ldak5 .linux --bfile <plink_file_name>
           --cut-weights <file_name>
ldak5 .linux --bfile <plink_file_name>
           --calc-weights-all <file_name>
```

Every SNP  $k$  was standardized by subtracting  $2p^k$  and dividing by  $\sqrt{2p^k(1-p^k)}$ , where  $p^k$  is its minor allele frequency. The minor allele frequencies were computed using Hapmap 3 data rather than from the data itself, To ensure that the summary statistics in both data sets use the same normalization.

Sex was used as a covariate in all analyses. The top 10 principal components were used as additional covariates in Table 1 and in Supplemental Tables S3 and S5. To use SNPs from the MHC region as covariates for T1D and RA, we ranked all SNPs in chromosome 6 between loci 25963966 and 34013250 (hg18) according to their correlation with the phenotype and then selected the 24 top SNPs (for T1D) and the top 31 SNPs (for RA)

by maximizing the area under the receiving operating characteristic curve (AUC) via a five-fold cross validation using a logistic regression model. All SNPs in the MHC region were excluded from the genetic similarity matrix computations of T1D and RA.

LD scores were computed in-sample using the overlapping controls with a 0.1 centiMorgan window via the ldsc software<sup>3</sup> and were used by both PCGC-s-LD and LDSC. In Table 2, LDSC used a predetermined intercept and weighted all summary statistics by the inverse of the LD scores as recommended in [2], but a second weighting was not performed (see the discussion in the main text for further elaboration on these issues). The results with two rounds of weighting were similar (Table S5).

In all analyses, confidence intervals were computed using a block jackknife procedure with 200 blocks of SNPs, as in LDSC [2].

### 13 The Effects of Preprocessing the Data

The main text compares the performance of LDSC with omitted covariates to PCGC with included covariates. Under ideal conditions, LDSC with omitted covariates is almost equivalent to PCGC with omitted covariates, and this indeed was the case under the simulation studies. However, this equivalence can break down due to preprocessing of the data. Here we provide a short discussion of these issues. We consider LDSC invoked with weighting of the test statistics by the inverse of the LD score (but not by their posterior variance) and with a predetermined intercept. Recall that the PCGC-s and LDSC estimators in the absence of covariates are given by:

$$\hat{\rho}_{t_1, t_2}^{\text{pcgc-s}} = \frac{\frac{\sqrt{n_{t_1} n_{t_2}}}{m} \sum_{k=1}^m z_{t_1}^k z_{t_2}^k - \sum_{i, j \in S_{t_1, t_2}} \tilde{y}_{t_1}^i \tilde{y}_{t_2}^j G_{t_1, t_2}^{i, j}}{\frac{n_{t_1} n_{t_2}}{m^2} \sum_{k, h=1}^m \hat{r}_{t_1}^{k, h} \hat{r}_{t_2}^{k, h} - \sum_{i, j \in S_{t_1, t_2}} \left(G_{t_1, t_2}^{i, j}\right)^2}. \quad (73)$$

$$\hat{\rho}_{t_1, t_2}^{\text{ldsc}} = \frac{\frac{\sqrt{n_{t_1} n_{t_2}}}{m} \sum_{k=1}^m z_{t_1}^k z_{t_2}^k - \sum_{i, j \in S_{t_1, t_2}} \tilde{y}_{t_1}^i \tilde{y}_{t_2}^j}{\frac{n_{t_1} n_{t_2}}{m} E[\ell]}. \quad (74)$$

Here,  $S_{t_1, t_2}$  is the set of pairs of indices  $i, j$  that refer to the same individual in the two studies, and  $E[\ell]$  is the mean LD score among all variants in the study.

If both studies used the exact same preprocessing prior to computing the test statistics, Equations 73 and 74 are almost equivalent: The second term of the numerator of Equation 74 (the so-called LDSC intercept) very closely approximates the second term of the numerator of Equation 73, because the genetic similarity coefficient of an individual with herself is typically very close to 1.0 when using a large number of variants. Furthermore, the denominator of Equation 74 is an unbiased estimator of the denominator of Equation 73 when the LD patterns in the two studies are the same as in a reference population from which LD scores was computed [5]. The two aforementioned assumptions are unlikely to hold exactly under case-control sampling, but our simulation studies indicate that under a highly polygenic trait model, the deviation from these assumptions is very small.

Unfortunately, the two assumptions can be violated when the two studies differ in the preprocessing of the data. Namely, the genotype distribution in the two studies can differ when using different SNP normalizations or when regressing principal components out of the genotypes.

<sup>3</sup><https://github.com/bulik/ldsc>



We first consider the effect of different normalization of SNPs. Under ideal conditions, every SNP  $k$  is standardized by subtracting  $2p^k$  and dividing by  $\sqrt{2p^k(1-p^k)}$ , where  $p^k$  is its minor allele frequency. However,  $p^k$  is an unknown parameter that needs to be estimated from data. Many studies estimate this value from the sample and thus use a study-specific normalization. This can lead to situations where the genetic similarity coefficient of an individual shared between two studies, given by  $\sum_k X_{t_1}^{k,i} X_{t_2}^{k,j} / m$  (where  $i$  and  $j$  refer to the same individual) can deviate from 1.0. Although the deviation is typically small (less than 0.03 on average in the analysis of the WTCCC data), the LDSC estimator is very sensitive to such small deviations.

Regression of principal components can also affect the approximate equivalence between Equations 73 and 74. Ref. [5] argues that regression of principal components is likely to have a minimal effect on short-range LD patterns in the data, and thus advocates estimating LD using a limited window size. However, regression of PCs can lead to small deviations in the genetic similarity coefficient estimates of an individual with herself from 1.0, which can severely affect the LDSC intercept.

We note that although genetic similarity coefficient estimates of an individual with herself that deviate from 1.0 are biased estimators, treating these genetic similarity coefficients as if they were 1.0, without also correcting the first part of the numerator accordingly, can increase rather than decrease the bias of  $\hat{\rho}_{t_1,t_2}^{\text{ldsc}}$ .

We conclude that estimating variance components via summary statistics is sensitive to preprocessing. We therefore recommend that researchers provide summary statistics that can minimize the bias due to preprocessing, by enabling other researchers to replicate the preprocessing procedure. Namely, we recommend that researchers publish the in-sample LD information of their samples after normalization and regression of principal components. We further recommend that researchers normalize SNPs according to published minor allele frequencies based on a reference population rather than in-sample estimates. Finally, we recommend that researchers publish the estimated principal components so that researchers with access to overlapping individuals can replicate the preprocessing exactly for these overlapping individuals. We carried out these steps in the results reported in the manuscript.

## 14 Simulations

The simulation procedure consisted of first generating SNPs with LD patterns and then generating phenotypes based on these SNPs. Here we describe these steps.

The simulation of LD is an active research topic, but existing simulation require an elaborate model of population history [8], which is beyond the scope of our study. The use of real genotypes is hardly an option, because simulation of case-control studies requires first obtaining a population sample with millions of individuals and then down-sampling cases and controls. Here we used a simple model based on a Gaussian field with a single parameter controlling the degree of LD, similarly to other simulations of case-control studies [9]. Briefly, we first sampled a minor allele frequency for each SNP  $k$  in the range  $[0.05, 0.5]$ . Afterwards, two independent vectors  $\mathbf{v}_m, \mathbf{v}_p$  corresponding to maternal and paternal chromosomes were sampled for each individual from a zero mean multivariate normal distribution with a covariance matrix  $\mathbf{R}$  obeying  $R_{kh} = \theta^{|k-h|}$ , where  $\theta \in [0, 1]$  is a tunable parameter. Finally, the maternal and paternal alleles of

each SNP  $k$  were set to the minor allele if  $v_m^k$  and  $v_p^k$  exceeded the normal distribution percentile corresponding to their respective MAF. The normal vectors were generated without explicitly computing the matrix  $\mathbf{R}$ , using the well known result that a first order normal autoregressive process with autocorrelation parameter  $\theta$  has the covariance matrix  $\mathbf{R}$  [10].

Each SNP was first encoded as a vector of  $\{0,1,2\}$  (corresponding to the number of minor alleles) and then standardized to have a zero mean and unit variance in the population. The two effects of each SNP were sampled from  $\mathcal{N}\left(\mathbf{0}, \begin{matrix} \sigma_{g_{t_1}}^2/m & \rho_{t_1,t_2}/m \\ \rho_{t_1,t_2}/m & \sigma_{g_{t_2}}^2/m \end{matrix}\right)$ , where  $m$  is the number of SNPs.

Binary covariates were generated as vectors of  $\{0,1\}$  and then standardized. Covariate effects were generated in several stages. First, the effect of each covariate  $j$  in study  $t$ ,  $\beta_t^j$ , was sampled from  $\mathcal{N}(0,1)$ . Afterwards, the effect of the first covariate was multiplied by a parameter  $w \geq 1$ . Finally, all effects  $\beta_t^j$  were scaled by a constant to ensure that the contribution of the covariates to the liability variance,  $\sum_j (\beta_t^j)^2$ , yields the desired heritability level. This procedure enables tuning the normality of the aggregated covariates effect via the parameter  $w$ ; Values of  $w$  close to 1 yield an approximately normal distribution of the aggregate effect.

The liability of every individual was computed as the weighted sum of the SNPs and the covariates multiplied by their effects, and an environmental term sampled from  $\mathcal{N}\left(0, 1 - \sigma_{g_t}^2\right)$ . The affection cutoff was determined empirically from the data as the  $1-K$  percentile of the liabilities, where  $K$  was the simulated prevalence level. Individuals with liability greater than the affection cutoff were marked as cases.

In each experiment we first generated a population of size  $n_t/K_t$  (where  $n_t$  is the desired sample size and  $K_t$  is the trait prevalence) and then sampled the desired number of cases and controls from this population.

To generate simulations with MAF and LD-dependent SNP weightings, we made several modifications to the simulations algorithm. First, we divided the SNPs in to 10 different LD blocks, where the correlation between the Gaussian fields in each LD block  $b$  is a different number  $\theta_b$ , with  $\theta_b \in (0.1, 0.2, 0.3, 0.4, 0.5, 0.6, 0.7, 0.8, 0.9, 0.95)$ . This was done in order for some SNPs to have significantly different LD scores (and thus different weights) than the others. Second, the SNP effects were sampled from a MAF and LD-dependent distribution, using the LDAK model [6]. Specifically, the effect of every SNP  $k$ ,  $\beta_k$ , was generated from a zero-mean normal distribution with variance  $(p_k(1 - p_k))^{0.75} w_k/M$ , where the weights  $w_k$  were selected to minimize the average  $L_2$  norm of the quantity  $1 - \sum_{k=1}^m (r^{kj})^2 w_k$  across all SNPs  $j$ .

We computed the LDAK weights using the LDAK software [6]. Specifically, after creating an (unascertained) population of individuals, we created a plink file for a randomly selected subset of 10,000 individuals, and then computed the SNP weights by invoking LDAK with the options:

```
ldak5 .linux --bfile <plink_file_name>
--no-thin YES --cut-weights <file_name>
ldak5 .linux --bfile <plink_file_name>
--calc-weights-all <file_name> --quick-weights YES.
```

We used the quick-weights option to expedite the simulation studies (which encompasses

hundreds of different simulations). We note that our results demonstrate that PCGC can be adapted for different genetic architectures, and so the specific weight values are not of central importance for this demonstration.

Unless otherwise stated, all simulated datasets consisted of two studies of two traits with 1% prevalence, 50% heritability and 50% genetic correlation, with each study having 2,000 cases, 1,000 unique and 1,000 overlapping controls, 10,000 single nucleotide polymorphisms (SNPs) with a correlation of between 25% and 90% between adjacent SNPs. In most simulations all SNPs influenced the phenotype, though we verified that relaxing this assumption does not affect the results (Figure S10). 100 simulations were conducted for each unique combination of settings.

## 15 Use of Alternative Methods

Here we describe how LDSC and REML were used in the results section.

REML estimates were computed via GCTA [11]. Specifically, heritability was estimated via the following two commands:

```
gcta64 --bfile <file_name> --make-grm --out <file_name>
gcta64 --grm <file_name> --reml-bivar --pheno <phenotypes_file>
      --reml-bivar-prevalence <trait 1 prevalence> <trait 2 prevalence>
      --qcovar <covariates file>
```

LDSC estimates in the real data analysis were computed via the command:

```
python ldsc.py --w-ld <file_name> --ref-ld <file_name>
      --rg <sumstats1>,<sumstats1>
      --samp_prev <sample_prevalence1>,<sample_prevalence2>
      --pop-prev <prevalence1>,<prevalence2> --M <#variants>
```

When using a predetermined intercept, we also added the arguments:

```
intercept -h2 1,1 --intercept-gencov 0, <intercept>
```

where the provided intercept was computed as described in [2].

## References

- [1] D. Golan and S. Rosset. Effective genetic-risk prediction using mixed models. *Am. J. Hum. Genet.* 95(4) (2014), 383–93.
- [2] B. Bulik-Sullivan et al. An atlas of genetic correlations across human diseases and traits. *Nat. Genet.* 47(11) (2015), 1236–41.
- [3] D. Golan, E.S. Lander, and S. Rosset. Measuring missing heritability: Inferring the contribution of common variants. *Proc. Natl. Acad. Sci. USA* 111(49) (2014), E5272–81.
- [4] C.E. McCulloch, S.R. Searle, and J.M. Neuhaus. *Generalized, Linear, and Mixed Models*. 2nd. Wiley Series in Probability and Statistics, 2008.
- [5] B. Bulik-Sullivan. Relationship between LD Score and Haseman-Elston Regression. *bioRxiv* (2015), 018283.

- [6] D. Speed et al. Reevaluation of SNP heritability in complex human traits. *Nat. Genet.* 49(7) (2017), 986.
- [7] M. Pirinen, P. Donnelly, C.C. Spencer, et al. Efficient computation with a linear mixed model on large-scale data sets with applications to genetic studies. *Ann. Appl. Stat.* 7(1) (2013), 369–390.
- [8] S. Hoban, G. Bertorelle, and O.E. Gaggiotti. Computer simulations: tools for population and evolutionary genetics. *Nat. Rev. Genet.* 13(2) (2011), 110–22.
- [9] B.K. Bulik-Sullivan et al. LD Score regression distinguishes confounding from polygenicity in genome-wide association studies. *Nat. Genet.* 47(3) (2015), 291–5.
- [10] C. Rasmussen and C. Williams. *Gaussian Processes for Machine Learning*. The MIT Press, 2006.
- [11] J. Yang et al. GCTA: a tool for genome-wide complex trait analysis. *Am. J. Hum. Genet.* 88(1) (2011), 76–82.
